# Supplementary material for: Disentangling the Complex Relationships Between Autoimmune Diseases and Cancer Through Polygenic Risk Scores: Evidence from a Large Prospective Study
Source: Research Square preprint supplement (doi:10.21203/rs.3.rs-6491161/v1), 2025-05-07
Supplement: Supplementary file 1 [file 66f8c90f966dfa89cf2c75c7.xlsx]

## Sheet: Contents
Supplementary Tables for
Large-scale population-based study highlights increased cancer risk among individuals with elevated genetic predisposition to autoimmune diseases
Table S1. List of cancer types and their ICD (9 or 10) codes or components
Table S2. Sources of summary statistics of genome-wide association study (GWAS) on six autoimmnue diseases
Table S3. The incidence (per 100000 Person years) of six autoimmune diseases in United Kingdom
Table S4. SNPs used to construct polygenic risk score (PRS) of Crohn’s disease (CD)
Table S5. SNPs used to construct polygenic risk score (PRS) of ulcerative colitis (UC)
Table S6. SNPs used to construct polygenic risk score (PRS) of multiple sclerosis (MS)
Table S7. SNPs used to construct polygenic risk score (PRS) of rheumatoid arthritis (RA)
Table S8. SNPs used to construct polygenic risk score (PRS) of type 1 diabetes mellitus (T1D)
Table S9. SNPs used to construct polygenic risk score (PRS) of systemic lupus erythematosus (SLE)
Table S10. Sources of summary statistics of genome-wide association study (GWAS) on selected cancers
Table S11. SNPs used to construct polygenic risk scores (PRSs) for selected cancers
Table S12. List of blood cell count and C-reactive protein
Table S13. Definition of covariates included in observational association analysis in UK Biobank
Table S14. Baseline characteristics of participants.
Table S15. Association between baseline autoimmune disease (yes or no) and cancer risk
Table S16. Associations between baseline autoimmune disease (yes or no) and cancer risk after additionally adjusting for immunosuppressant use at baseline
Table S17. Results of all associations between baseline autoimmune disease (yes or no) and cancer risk in whole population and stratified by sex
Table S18. Association between combined autoimmune disease polygenic risk scores (PRSs) (per SD increase) and risk of autoimmune diseases
Table S19. Association between specific autoimmune disease polygenic risk scores (PRSs) (per SD increase) and risk of autoimmune diseases
Table S20. Association between combined autoimmune-polygenic risk score (PRS) (per SD increase) and cancer risk
Table S21. Results of all associations between autoimmune disease polygenic risk scores (PRSs) (disease-specific and combined) (per SD increase) and cancer risk
Table S22. Genetic correlation between autoimmune disease and cancer
Table S23. Association between cancer polygenic risk scores (PRSs) (per SD increase) and cancer risk
Table S24. Association between SLE-PRS and prostate cancer risk stratified by prostate PRS (low, high)
Table S25. Association between specific autoimmune disease at baseline (yes/no) and cancer risk
Table S26. Associations of baseline autoimmune disease (yes or no) with blood cell count and C-reactive protein (CRP)
Table S27. Mediation analysis of the association between baseline autoimmune disease (yes or no) and cancers, with blood cell count, CRP, or immunosuppressant use as the mediator
Table S28. Association between baseline autoimmune disease-related blood cell count (per SD increase), CRP (per SD increase), and the risk of cancers
Table S29. Association between immunosuppressant use at baseline (yes or no) and the risk of cancers
Table S30. Associations between autoimmune polygenic risk scores (PRSs) (per SD increase) and blood cell count and C-reactive protein (CRP)
Table S31. Association between autoimmune polygenic risk scores (PRSs) and immunosuppressant use at baseline (yes or no)
Table S32. Association between autoimmune polygenic risk scores (PRSs)-related blood cell count (per SD increase), CRP (per SD increase), and the risk of cancers

## Sheet: Table S1
Table S1. List of cancer types and their ICD (9 or 10) codes or components
Cancer type	ICD/component
Anal cancer	C21, 1542, 1543
Bladder cancer	C67, 188
Brain cancer	C71, 191
Breast cancer	C50, 174
Cervix uteri cancer	C53, 180
Colorectal cancer	C18, C19, C20, 153, 154
Corpus uteri cancer	C54, 182
Hodgkin's disease	C81, 201
Kidney cancer	C64, 189
Liver cancer	C22, 155
Lung cancer	C34, 162
Lymphoid leukemia	C91, 204
Malignant neoplasms of lip, oral cavity and pharynx	C00, C01, C02, C03, C04, C05, C06, C07, C08, C09, C10, C11, C12, C13, C14, 140, 141, 142, 143, 144, 145, 146, 147, 148, 149
Melanoma	C43, 172
Multiple myeloma	C90, 203
Non-Hodgkin's lymphoma	C82,C83,C84,C85,C86,C96, 202
Esophageal cancer	C15, 150
Ovary cancer	C56, 183
Overall cancer	C00,C01,C02,C03,C04,C05,C06,C07,C08,C09,C10,C11,C12,C13,C14,C15,C16,C17,C18,C19,C20,C21,C22,C23,C24,C25,C26,C27,C28,C29,C30,C31,C32,C33,C34,C35,C36,C37,C38,C39,C40,C41,C42,C43,C45,C46,C47,C48,C49,C50,C51,C52,C53,C54,C55,C56,C57,C58,C59,C60,C61,C62,C63,C64,C65,C66,C67,C68,C69,C70,C71,C72,C73,C74,C75,C76,C77,C78,C79,C80,C81,C82,C83,C84,C85,C86,C87,C88,C89,C90,C91,C92,C93,C94,C95,C96,C97,140,141,142…
Pancreas cancer	C25, 157
Prostate cancer	C61, 185
Stomach cancer	C16, 151
Testis cancer	C62, 186
Thyroid cancer	C73, 193
Hematological cancer	Hodgkin's disease, Non-Hodgkin's lymphoma, Lymphoid leukemia, Multiple myeloma
Digestive cancer	Anal cancer, Colorectal cancer, Oesophagus cancer, Pancreas cancer, Stomach cancer, Liver cancer
Urinary cancer	Bladder cancer, Kidney cancer
Male genital cancer	Prostate cancer, Testis cancer
Female genital cancer	Cervix uteri cancer, Corpus uteri cancer, Ovary cancer
HPV-related cancer	Anal cancer, Cervix uteri cancer, Malignant neoplasms of lip, oral cavity and pharynx
ICD, International Classification of Diseases

## Sheet: Table S2
Table S2. Sources of summary statistics of genome-wide association study (GWAS) on six autoimmnue diseases
Source (or PMID)	Disease	Population	Sex	Case	Control	Full summary statistics
26502338	Systemic lupus erythematosus	European	Both	5201	9066	http://ftp.ebi.ac.uk/pub/databases/gwas/summary_statistics/GCST003001-GCST004000/GCST003156
Neale lab	female: Non-cancer illness code, self-reported: systemic lupus erythematosis/sle	European	Female	359	193794	https://broad-ukb-sumstats-us-east-1.s3.amazonaws.com/round2/additive-tsvs/20002_1381.gwas.imputed_v3.female.tsv.bgz
31604244	Multiple sclerosis	European	Both	47429	68374	No (note: the full GWAS summary data from GCST001198 [9,772 European ancestry cases, 16,849 European ancestry controls] was used in LDSC analysis)
Neale lab	female: Non-cancer illness code, self-reported: multiple sclerosis	European	Female	954	193199	https://broad-ukb-sumstats-us-east-1.s3.amazonaws.com/round2/additive-tsvs/20002_1261.gwas.imputed_v3.female.tsv.bgz
Neale lab	male: Non-cancer illness code, self-reported: multiple sclerosis	European	Male	372	166616	https://broad-ukb-sumstats-us-east-1.s3.amazonaws.com/round2/additive-tsvs/20002_1261.gwas.imputed_v3.male.tsv.bgz
34012112	Type 1 diabetes	European	Both	18942	501638	http://ftp.ebi.ac.uk/pub/databases/gwas/summary_statistics/GCST90014001-GCST90015000/GCST90014023
Neale lab	female: Type 1 diabetes	European	Female	238	193936	https://broad-ukb-sumstats-us-east-1.s3.amazonaws.com/round2/additive-tsvs/E4_DM1.gwas.imputed_v3.female.tsv.bgz
Neale lab	male: Type 1 diabetes	European	Male	345	166675	https://broad-ukb-sumstats-us-east-1.s3.amazonaws.com/round2/additive-tsvs/E4_DM1.gwas.imputed_v3.male.tsv.bgz
28067908	Ulcerative colitis	European	Both	12366	33609	http://ftp.ebi.ac.uk/pub/databases/gwas/summary_statistics/GCST004001-GCST005000/GCST004133/uc_build37_45975_20161107.txt.gz
Neale lab	female: Non-cancer illness code, self-reported: ulcerative colitis	European	Female	1021	193132	https://broad-ukb-sumstats-us-east-1.s3.amazonaws.com/round2/additive-tsvs/20002_1463.gwas.imputed_v3.female.tsv.bgz
Neale lab	male: Non-cancer illness code, self-reported: ulcerative colitis	European	Male	895	166093	https://broad-ukb-sumstats-us-east-1.s3.amazonaws.com/round2/additive-tsvs/20002_1463.gwas.imputed_v3.male.tsv.bgz
28067908	Crohn’s disease	European	Both	12194	28072	http://ftp.ebi.ac.uk/pub/databases/gwas/summary_statistics/GCST004001-GCST005000/GCST004132/cd_build37_40266_20161107.txt.gz
Neale lab	female: Non-cancer illness code, self-reported: crohns disease	European	Female	625	193528	https://broad-ukb-sumstats-us-east-1.s3.amazonaws.com/round2/additive-tsvs/20002_1462.gwas.imputed_v3.female.tsv.bgz
Neale lab	male: Non-cancer illness code, self-reported: crohns disease	European	Male	471	166517	https://broad-ukb-sumstats-us-east-1.s3.amazonaws.com/round2/additive-tsvs/20002_1462.gwas.imputed_v3.male.tsv.bgz
35470158	Rheumatoid arthritis	Northwestern European	Both	31313	995377	https://download.decode.is/form/2022/RA_All.txt.gz
Neale lab	female: Non-cancer illness code, self-reported: rheumatoid arthritis	European	Female	2758	191395	https://broad-ukb-sumstats-us-east-1.s3.amazonaws.com/round2/additive-tsvs/20002_1464.gwas.imputed_v3.female.tsv.bgz
Neale lab	male: Non-cancer illness code, self-reported: rheumatoid arthritis	European	Male	1259	165729	https://broad-ukb-sumstats-us-east-1.s3.amazonaws.com/round2/additive-tsvs/20002_1464.gwas.imputed_v3.male.tsv.bgz

## Sheet: Table S3
Table S3. The incidence (per 100000 Person years) of six autoimmune diseases in United Kingdom
source (or PMID)	measure_name	location_name	cause_name	sex	year	val	lower	upper
32690524	Incidence	United Kingdom	Crohn’s disease	Both sexes	-	10.2	10	10.5
32690524	Incidence	United Kingdom	Crohn’s disease	Male	-	9.3	0	9.6
32690524	Incidence	United Kingdom	Crohn’s disease	Female	-	11.1	10.8	11.5
GBD	Incidence	United Kingdom	Diabetes mellitus type 1	Both sexes	2019	18.0388	14.3368	22.2033
GBD	Incidence	United Kingdom	Diabetes mellitus type 1	Male	2019	18.8488	14.9422	23.2731
GBD	Incidence	United Kingdom	Diabetes mellitus type 1	Female	2019	17.2082	13.6775	21.0995
GBD	Incidence	United Kingdom	Inflammatory bowel disease	Both sexes	2019	23.1116	20.332	26.2808
GBD	Incidence	United Kingdom	Inflammatory bowel disease	Male	2019	24.8396	21.8518	28.2285
GBD	Incidence	United Kingdom	Inflammatory bowel disease	Female	2019	21.4082	18.8533	24.4216
GBD	Incidence	United Kingdom	Multiple sclerosis	Both sexes	2019	4.40464	3.88768	4.94782
GBD	Incidence	United Kingdom	Multiple sclerosis	Male	2019	3.07681	2.70193	3.47605
GBD	Incidence	United Kingdom	Multiple sclerosis	Female	2019	5.75292	5.06298	6.46935
GBD	Incidence	United Kingdom	Rheumatoid arthritis	Both sexes	2019	23.5941	21.4508	25.8711
GBD	Incidence	United Kingdom	Rheumatoid arthritis	Male	2019	13.0055	11.7883	14.3423
GBD	Incidence	United Kingdom	Rheumatoid arthritis	Female	2019	33.9791	30.9344	37.2076
36241363	Incidence	United Kingdom	Systemic lupus erythematosus	Both sexes	2019	4.04	3.89	4.17
36241363	Incidence	United Kingdom	Systemic lupus erythematosus	Male	2019	1.19	1.14	1.23
36241363	Incidence	United Kingdom	Systemic lupus erythematosus	Female	2019	6.82	6.58	7.05
32690524	Incidence	United Kingdom	Ulcerative colitis	Both sexes	-	15.7	15.4	15.9
32690524	Incidence	United Kingdom	Ulcerative colitis	Male	-	16.7	16.3	17.1
32690524	Incidence	United Kingdom	Ulcerative colitis	Female	-	14.7	14.3	15
GBD, Global Burden of Disease

## Sheet: Table S4
Table S4. SNPs used to construct polygenic risk score (PRS) of Crohn’s disease (CD)
Disease	SNP	chr	pos	Both sexes					Male					Female
				alt	ref	beta	se	pval	alt	ref	beta	se	pval	alt	ref	beta	se	pval
CD	rs2476601	1	114377568	G	A	0.2312	0.0286	6.44e-16	G	A	0.000546249	0.000301419	0.0699486	G	A	0.000887489	0.000300283	0.00312194
CD	rs11589479	1	155033308	G	A	0.1335	0.0221	1.49e-09	A	G	-0.000354712	0.000247298	0.151474	A	G	-0.000501323	0.000245551	0.0411903
CD	rs12131079	1	155319668	C	T	0.1088	0.0174	3.99e-10	T	C	-0.000408696	0.000200078	0.0410848	T	C	-0.000359278	0.000197655	0.0691119
CD	rs34687326	1	159799910	G	A	0.1649	0.0288	1.06e-08	A	G	-0.000300757	0.000279933	0.282649	A	G	-0.000820574	0.000276149	0.00296397
CD	rs114802258	1	160831855	C	T	0.2245	0.0384	5.11e-09	T	C	-0.000533296	0.000463662	0.25007	T	C	0.000313527	0.000457644	0.493288
CD	rs6704109	1	172857050	C	T	-0.1748	0.0181	5.1e-22	T	C	0.000365973	0.000214267	0.087634	T	C	0.000127228	0.000212416	0.549203
CD	rs1775448	1	197615130	G	A	-0.122	0.017	6.78e-13	G	A	-0.000304907	0.000197001	0.121686	G	A	-0.000343569	0.000194445	0.0772425
CD	rs35730213	1	200874229	G	C	0.1166	0.0181	1.17e-10	C	G	-0.00026391	0.000201705	0.19074	C	G	-0.000249541	0.000200288	0.212799
CD	rs3122605	1	206955041	G	A	0.1748	0.0227	1.24e-14	A	G	-0.000755965	0.000264519	0.0042653	A	G	-0.000695826	0.000262338	0.00799287
CD	rs2243198	1	207011492	G	A	0.327	0.0582	1.9e-08	G	A	0.000236725	0.000646565	0.71427	G	A	0.000979928	0.000643259	0.127665
CD	rs116068903	1	67498721	C	T	0.4161	0.0753	3.29e-08	T	C	-0.00030798	0.000736893	0.675988	T	C	-0.000165281	0.000733246	0.821661
CD	rs12059621	1	67529981	G	A	-0.1704	0.0221	1.4e-14	G	A	-0.00059929	0.000240779	0.0128125	G	A	-0.000637683	0.00023917	0.0076713
CD	rs7528804	1	67593819	G	A	0.1537	0.0238	9.79e-11	A	G	-0.000214539	0.000280664	0.444632	A	G	-0.000368653	0.000277695	0.184329
CD	rs74080014	1	67608994	G	A	-0.1957	0.0296	3.85e-11	G	A	-0.000331881	0.000297814	0.265114	G	A	-0.000219295	0.000294384	0.456316
CD	rs11465791	1	67649496	G	A	-0.2366	0.0367	1.12e-10	A	G	1.63341e-05	0.000396914	0.967174	A	G	0.000883504	0.000393524	0.0247624
CD	rs6664119	1	67655895	C	T	-0.15	0.016	6.89e-21	T	C	0.000162419	0.000184249	0.378036	T	C	0.000490276	0.000182459	0.00720946
CD	rs114425253	1	67680321	G	A	-0.382	0.0662	8.1e-09	A	G	0.000296204	0.00102761	0.77316	A	G	0.00111169	0.00101004	0.271055
CD	rs7517847	1	67681669	G	T	-0.3447	0.0165	5.84e-97	G	T	-0.000674547	0.000184526	0.000256692	G	T	-0.0010061	0.000182903	3.7872e-08
CD	rs11581607	1	67707690	G	A	0.7935	0.0388	6.33e-93	A	G	-0.00183464	0.000366928	5.73868e-07	A	G	-0.00187907	0.000364374	2.51209e-07
CD	rs2088242	1	67763780	C	T	-0.2786	0.018	2.78e-54	T	C	0.000916546	0.000204704	7.56019e-06	T	C	0.00101029	0.000202698	6.2267e-07
CD	rs10889680	1	67768593	T	A	-0.2329	0.0286	3.6e-16	A	T	0.000764232	0.000298817	0.0105428	A	T	0.00112691	0.000297732	0.000153769
CD	rs11576006	1	67772013	C	T	-0.1173	0.02	4.83e-09	C	T	-0.000235636	0.000213497	0.269726	C	T	-0.000304227	0.000211778	0.150851
CD	rs12138718	1	67912079	G	A	0.1159	0.0164	1.74e-12	G	A	0.00025148	0.000189105	0.183573	G	A	0.000402615	0.000187293	0.0315837
CD	rs6584282	10	101286495	G	A	-0.1658	0.016	3.44e-25	G	A	-0.000239502	0.00018371	0.19234	G	A	-0.000451405	0.000181752	0.0130058
CD	rs10884966	10	112185596	G	A	-0.1131	0.0171	4.13e-11	A	G	0.000336692	0.000192764	0.0806991	A	G	-0.000134401	0.000190864	0.481326
CD	rs2002695	10	30805480	G	A	-0.1293	0.0189	8.31e-12	G	A	3.24663e-06	0.000215756	0.987994	G	A	-0.000179738	0.000214002	0.400972
CD	rs1148246	10	35496626	C	T	0.1323	0.0167	2.09e-15	T	C	-0.000416321	0.000193034	0.0310285	T	C	-0.000476405	0.000191448	0.0128314
CD	rs61839660	10	6094697	C	T	-0.1468	0.0261	1.98e-08	T	C	0.000404596	0.000308027	0.189013	T	C	0.000483402	0.000303702	0.111454
CD	rs80028601	10	64301873	G	A	-0.2023	0.0326	5.12e-10	A	G	6.09677e-05	0.000390808	0.87603	A	G	0.00048716	0.00038771	0.208934
CD	rs79829650	10	64380124	G	T	0.1874	0.029	1.09e-10	T	G	-0.00016029	0.000330341	0.627518	T	G	-0.00044502	0.000327178	0.173776
CD	rs10822050	10	64438771	C	T	0.1827	0.0162	2.35e-29	C	T	0.000394021	0.000188253	0.0363476	C	T	0.000332542	0.00018649	0.0745613
CD	rs224136	10	64470675	C	T	0.1655	0.0228	3.83e-13	T	C	-0.000302384	0.00025765	0.240548	T	C	-0.000162505	0.000255384	0.524571
CD	rs2675670	10	75655628	G	C	-0.1074	0.0161	2.9e-11	C	G	0.000157491	0.000185829	0.396713	C	G	-7.28521e-05	0.000184348	0.692704
CD	rs1250573	10	81042475	G	A	0.1522	0.0179	1.92e-17	A	G	-0.000284022	0.000195335	0.145941	A	G	-0.000142981	0.00019304	0.458888
CD	rs1870148	10	82271341	G	A	-0.1351	0.0206	5.44e-11	A	G	0.000288726	0.000225788	0.200987	A	G	2.32742e-05	0.000224586	0.917462
CD	rs11236797	11	76299649	C	A	-0.176	0.0161	8.51e-28	A	C	0.000283769	0.000184747	0.124544	A	C	0.000186148	0.000182756	0.308411
CD	rs77566919	12	113163656	G	A	0.1089	0.0185	4.13e-09	A	G	7.51488e-05	0.000200842	0.708279	A	G	-8.83314e-05	0.000198944	0.657041
CD	rs1491934	12	40596166	T	A	-0.1499	0.0261	9.17e-09	T	A	6.79806e-06	0.000335501	0.983834	T	A	-0.00053423	0.000332776	0.108413
CD	rs34635748	12	40824663	C	T	-0.4794	0.0504	1.95e-21	T	C	0.00238707	0.000740102	0.00125853	T	C	0.000356951	0.000720731	0.620416
CD	rs2052802	12	40824739	G	A	-0.1162	0.0196	3.29e-09	A	G	2.83517e-06	0.000226021	0.989992	A	G	0.000218587	0.000223666	0.328426
CD	rs28999107	12	6493100	G	T	-0.1083	0.0178	1.06e-09	T	G	0.000205016	0.000187063	0.27309	T	G	-0.000114623	0.000185065	0.535677
CD	rs80244186	13	42917861	C	T	0.1246	0.0226	3.66e-08	C	T	-7.82328e-05	0.000265916	0.768605	C	T	0.000421096	0.000262779	0.109053
CD	rs1373904	13	44475398	G	A	0.141	0.0189	9.11e-14	G	A	0.000498899	0.000227364	0.028217	G	A	0.000782931	0.000225597	0.000519645
CD	rs194746	14	69282887	C	T	-0.0975	0.0161	1.24e-09	T	C	0.000175396	0.000183952	0.340346	T	C	0.000269126	0.00018258	0.140479
CD	rs3850378	14	88417517	C	T	0.199	0.0267	8.31e-14	C	T	0.000891462	0.000309816	0.0040103	C	T	0.000692303	0.000309841	0.0254592
CD	rs72743461	15	67441750	C	A	-0.1684	0.0187	2.26e-19	A	C	0.000290588	0.000215845	0.178214	A	C	0.000410997	0.000214407	0.0552517
CD	rs6416647	16	10965597	C	T	0.1007	0.0178	1.46e-08	C	T	2.17994e-05	0.000203005	0.914485	C	T	2.66573e-05	0.000201166	0.894578
CD	rs2021511	16	11344903	C	T	0.1082	0.0182	2.63e-09	T	C	-0.000104892	0.000205021	0.608923	T	C	-0.00032961	0.000203133	0.10467
CD	rs71381201	16	11357860	G	T	-0.3182	0.0543	4.58e-09	G	T	-0.00106123	0.000569626	0.0624608	G	T	-0.000371343	0.000563628	0.509996
CD	rs42861	16	28494421	G	A	0.1243	0.0167	8.87e-14	G	A	0.000146688	0.00018504	0.427933	G	A	0.000317952	0.000183284	0.0827867
CD	rs6500266	16	49962406	G	A	0.1138	0.0195	5.05e-09	G	A	0.000130248	0.000191195	0.495728	G	A	-6.63625e-05	0.000189397	0.726048
CD	rs11643164	16	50056554	C	T	0.0998	0.0175	1.15e-08	T	C	-7.35008e-05	0.000201621	0.715448	T	C	-0.000597067	0.000198814	0.00267241
CD	rs149399409	16	50110842	G	A	-0.2584	0.0398	8.39e-11	A	G	5.44162e-05	0.000491986	0.911929	A	G	0.00109736	0.000491576	0.0255941
CD	rs55938681	16	50235418	T	A	0.141	0.0209	1.47e-11	T	A	6.98492e-05	0.000248593	0.778728	T	A	0.000407433	0.000246057	0.0977542
CD	rs78769578	16	50290725	C	T	-0.1952	0.0275	1.36e-12	T	C	0.000344031	0.000305248	0.259722	T	C	0.000200691	0.000303652	0.508662
CD	rs77150043	16	50304249	C	T	-0.1792	0.0191	7.9e-21	T	C	0.000546084	0.000215779	0.0113825	T	C	0.000531151	0.000213798	0.0129792
CD	rs9934775	16	50383077	C	T	0.1408	0.0223	2.7e-10	T	C	-5.81509e-05	0.000250399	0.816358	T	C	-0.000257687	0.000248166	0.2991
CD	rs7500958	16	50391596	C	T	-0.1152	0.0184	4.27e-10	T	C	-1.04672e-05	0.000212161	0.960652	T	C	0.000295165	0.000209832	0.159527
CD	rs11644238	16	50404393	C	A	0.143	0.0202	1.3e-12	A	C	-9.78159e-05	0.000217682	0.653178	A	C	-0.000219288	0.000215987	0.309974
CD	rs1906053	16	50442899	G	A	0.1282	0.0164	5.38e-15	A	G	-0.000217747	0.000184705	0.238445	A	G	-0.00024083	0.000183093	0.188397
CD	rs72790325	16	50532695	C	T	-0.6157	0.0333	1.57e-76	T	C	0.00148192	0.000407748	0.000278705	T	C	0.00263367	0.000403638	6.82475e-11
CD	rs1990623	16	50565970	G	A	0.1768	0.0224	2.96e-15	G	A	0.000553234	0.000258533	0.0323646	G	A	0.000858306	0.000255548	0.000783273
CD	rs35419407	16	50575019	C	A	0.1814	0.0225	7.99e-16	A	C	-0.000406586	0.000226694	0.0728877	A	C	-0.000108026	0.00022451	0.6304
CD	rs146528649	16	50660964	G	T	-0.908	0.0493	7.51e-76	T	G	0.00439742	0.000620584	1.3864e-12	T	G	0.00393818	0.000611543	1.19951e-10
CD	rs117372389	16	50668077	G	T	-0.6622	0.0557	1.26e-32	T	G	0.00187003	0.000761438	0.0140537	T	G	0.00242358	0.000755399	0.00133523
CD	rs7186163	16	50686557	C	A	-0.1753	0.0171	1.2e-24	C	A	-0.000259463	0.000199053	0.19241	C	A	-0.000577101	0.000197387	0.00345941
CD	rs75489898	16	50723618	G	A	0.331	0.04	1.35e-16	A	G	-0.000357449	0.000397918	0.369027	A	G	-0.000721154	0.000392624	0.0662478
CD	rs2076756	16	50756881	G	A	0.385	0.0174	1.8e-108	G	A	0.00120725	0.000211855	1.21079e-08	G	A	0.00114431	0.000209951	5.03254e-08
CD	rs7205423	16	50769262	G	C	-0.1888	0.016	5.87e-32	G	C	-0.00030428	0.000183699	0.0976422	G	C	-0.000742812	0.000182305	4.61179e-05
CD	rs2270394	16	50847022	T	A	0.1279	0.019	1.82e-11	T	A	0.000188077	0.000209294	0.368854	T	A	0.000616309	0.000207263	0.00294404
CD	rs11862740	16	50847665	G	C	-0.2372	0.0378	3.45e-10	C	G	0.000184661	0.000402276	0.646206	C	G	0.00105497	0.000399725	0.00831001
CD	rs72798422	16	50866917	C	T	0.5495	0.0382	6.05e-47	C	T	0.00231137	0.000519959	8.78263e-06	C	T	0.00206891	0.000513666	5.63393e-05
CD	rs77634443	16	50897514	G	A	-0.3879	0.0348	7.63e-29	A	G	0.00171224	0.000420938	4.75054e-05	A	G	0.00130179	0.00041831	0.00185838
CD	rs62029940	16	50914402	C	T	-0.147	0.0219	1.81e-11	C	T	-3.306e-05	0.000239736	0.890318	C	T	-0.000265837	0.000236971	0.261943
CD	rs145126485	16	50918662	C	A	0.5236	0.0431	6.4e-34	C	A	0.00114304	0.000584205	0.0503984	C	A	0.00113063	0.000577176	0.0501258
CD	rs1872679	16	50978048	G	T	-0.1048	0.018	5.66e-09	G	T	8.70034e-05	0.000204206	0.670067	G	T	-0.00040427	0.00020203	0.0453898
CD	rs55709012	16	51002618	T	A	0.392	0.0375	1.48e-25	T	A	0.00147584	0.000444746	0.000905564	T	A	0.000710294	0.000440524	0.10688
CD	rs79028154	16	51013434	C	T	-0.4858	0.0358	6.01e-42	T	C	0.00123421	0.000433283	0.00439304	T	C	0.00207691	0.000430257	1.3862e-06
CD	rs1566045	16	51021803	C	T	0.114	0.0201	1.34e-08	C	T	0.000415552	0.000240258	0.0837024	C	T	0.00021626	0.000237815	0.36316
CD	rs11859823	16	51046380	C	T	-0.1548	0.0212	2.84e-13	T	C	-4.95649e-06	0.000237673	0.983362	T	C	0.000534796	0.000234641	0.0226558
CD	rs79147159	16	51131237	C	A	-0.3589	0.0436	1.92e-16	A	C	0.00042716	0.000487029	0.380448	A	C	0.000881213	0.000480366	0.0665872
CD	rs59926756	16	82879772	G	A	-0.1062	0.0176	1.74e-09	A	G	0.00010886	0.000202479	0.59083	A	G	0.000230525	0.000200056	0.249197
CD	rs2948542	17	25856486	G	A	0.1016	0.0163	5.15e-10	G	A	0.000567084	0.000186628	0.00237738	G	A	0.000336511	0.000184796	0.0686109
CD	rs3091315	17	32593665	G	A	-0.1579	0.0182	3.76e-18	G	A	-0.00023694	0.00020535	0.248571	G	A	-0.000514068	0.000203583	0.0115673
CD	rs159276	17	32691179	C	T	0.1844	0.0323	1.09e-08	C	T	-0.000177942	0.000367269	0.628032	C	T	0.000475965	0.000363237	0.190082
CD	rs12936409	17	38043649	C	T	-0.1426	0.016	4.31e-19	T	C	0.000135516	0.00018412	0.461719	T	C	0.000403421	0.000181932	0.0265948
CD	rs744166	17	40514201	G	A	-0.1142	0.0162	1.8e-12	G	A	-6.95767e-05	0.000185679	0.707872	G	A	-0.000276631	0.000183777	0.132259
CD	rs80262450	18	12818922	G	A	-0.2268	0.0244	1.34e-20	A	G	0.000969919	0.000281394	0.000567331	A	G	0.000375439	0.000278756	0.178035
CD	rs144309607	19	10492274	C	T	0.3712	0.047	2.69e-15	T	C	-0.000534873	0.000443457	0.227763	T	C	-0.000481636	0.000434828	0.268015
CD	rs142770866	19	10525372	G	A	-0.1753	0.0292	1.99e-09	A	G	0.000167218	0.000328837	0.611095	A	G	0.000648524	0.000328126	0.0481053
CD	rs62131887	19	10587596	C	T	0.1154	0.0185	4.45e-10	T	C	-0.000429976	0.000205426	0.0363424	T	C	-0.000545021	0.000204033	0.00755775
CD	rs2074452	19	1107160	C	T	0.1268	0.0186	1e-11	T	C	-0.000206037	0.000207106	0.319815	T	C	-0.00031839	0.000205762	0.121776
CD	rs4807570	19	1123652	G	A	-0.1811	0.0193	6.03e-21	A	G	0.000329231	0.00022913	0.150755	A	G	0.000354682	0.000227182	0.118472
CD	rs145026040	19	1178654	G	C	-0.1788	0.0238	6.05e-14	C	G	-0.000101042	0.000265242	0.703246	C	G	0.000580273	0.000263492	0.0276494
CD	rs55811668	19	1191611	C	T	0.1215	0.0191	1.9e-10	T	C	-0.000214331	0.000190186	0.259763	T	C	-0.000444786	0.000188777	0.0184669
CD	rs889100	19	33730032	T	A	0.1096	0.0172	1.68e-10	A	T	-0.000207387	0.000186374	0.265819	A	T	-0.000255196	0.000184414	0.166415
CD	rs62126620	19	33753200	G	A	-0.144	0.0201	8.61e-13	A	G	0.000531784	0.000233739	0.0229001	A	G	0.000118804	0.000231113	0.607215
CD	rs736289	19	33757062	C	T	-0.1033	0.0169	1.03e-09	C	T	-0.000275572	0.000187794	0.142264	C	T	-0.000480686	0.000185976	0.00974792
CD	rs492602	19	49206417	G	A	0.1084	0.0162	2.33e-11	G	A	0.000198353	0.000184443	0.282188	G	A	0.000165091	0.000182573	0.365865
CD	rs12470867	2	102926366	G	A	0.1178	0.0183	1.14e-10	A	G	-0.000615823	0.000200098	0.00208704	A	G	-0.000125858	0.000198125	0.525268
CD	rs2110735	2	103050925	G	A	-0.1372	0.0185	1.2e-13	G	A	-0.000545705	0.000221038	0.0135565	G	A	0.00018861	0.000217752	0.386398
CD	rs11683692	2	145509615	C	T	-0.2144	0.038	1.75e-08	C	T	-0.000394172	0.000427399	0.356395	C	T	-0.000226924	0.000425528	0.593844
CD	rs151175749	2	173424407	G	C	0.2483	0.0428	6.73e-09	G	C	-0.000184809	0.000523709	0.724176	G	C	-5.14188e-05	0.000520261	0.921271
CD	rs6740847	2	182308352	G	A	-0.104	0.0161	9.72e-11	G	A	-0.000340647	0.000185844	0.0668086	G	A	-0.000242841	0.000184533	0.188182
CD	rs1583792	2	198900288	C	T	0.0882	0.016	3.26e-08	T	C	-6.99861e-05	0.00018375	0.703295	T	C	-0.000152273	0.000182822	0.404899
CD	rs7563433	2	231095678	C	T	0.1525	0.02	2.14e-14	C	T	0.000636626	0.000234169	0.00655533	C	T	0.00064792	0.000231954	0.00521762
CD	rs113524366	2	231172539	G	A	-0.1107	0.0198	2.12e-08	G	A	-0.000431609	0.000225322	0.0554285	G	A	-0.000477537	0.000223436	0.0325795
CD	rs73110043	2	234149384	C	A	0.2272	0.033	5.67e-12	A	C	-0.000518319	0.000359769	0.149671	A	C	-0.000642049	0.000355592	0.0709859
CD	rs3816234	2	234185999	G	A	-0.2704	0.0162	1.51e-62	A	G	0.000543459	0.000183941	0.00313197	A	G	0.000544848	0.000182152	0.00277936
CD	rs10929032	2	234204354	G	C	-0.2003	0.0354	1.46e-08	G	C	-0.000260593	0.000384842	0.498317	G	C	-0.0010327	0.000383205	0.00704173
CD	rs12617453	2	234205342	T	A	-0.3673	0.0445	1.42e-16	T	A	-0.000171499	0.000452247	0.704529	T	A	-0.000151598	0.000448478	0.735343
CD	rs4343432	2	25161236	G	A	0.1123	0.0162	3.5e-12	G	A	-2.91392e-05	0.000183899	0.874101	G	A	0.000359289	0.000182219	0.04864
CD	rs7578575	2	25488819	T	A	-0.0972	0.0176	3.5e-08	A	T	0.000265975	0.0002038	0.191867	A	T	0.000421042	0.000201766	0.0369093
CD	rs1260326	2	27730940	C	T	-0.1053	0.0161	6.32e-11	C	T	-0.000462969	0.000187661	0.0136243	C	T	-0.000303914	0.000186245	0.102725
CD	rs11677002	2	28614401	C	T	-0.1124	0.0163	4.57e-12	C	T	-0.00039825	0.000185056	0.0313947	C	T	-0.000382147	0.000183027	0.0368053
CD	rs55946629	2	43851246	C	A	-0.1755	0.0231	2.85e-14	A	C	1.65115e-05	0.000264648	0.950252	A	C	0.00053308	0.000263075	0.042731
CD	rs7608697	2	61204641	C	A	0.1229	0.0163	4.03e-14	C	A	0.000439118	0.000189645	0.0205881	C	A	0.000409791	0.000187712	0.0290304
CD	rs3761158	20	44634912	G	A	0.1098	0.0165	2.65e-11	A	G	0.000303688	0.000189235	0.108534	A	G	0.000105802	0.000187803	0.573187
CD	rs310669	20	62212154	G	A	-0.0951	0.0173	4.02e-08	A	G	0.000389769	0.000194127	0.0446654	A	G	-0.000182861	0.000191871	0.34057
CD	rs6062496	20	62329099	G	A	-0.1223	0.0167	2.62e-13	A	G	4.56191e-05	0.000184167	0.804363	A	G	0.000234656	0.000182563	0.198674
CD	rs1297264	21	16816017	G	A	-0.1769	0.0163	1.59e-27	G	A	-0.000427066	0.000184647	0.0207303	G	A	-0.000562987	0.00018318	0.00211656
CD	rs2284553	21	34776695	G	A	0.1277	0.0165	1.14e-14	G	A	0.00014663	0.000187326	0.433773	G	A	0.000145348	0.00018584	0.434149
CD	rs73199862	21	35134421	C	T	-0.1651	0.0298	2.93e-08	C	T	-0.000225347	0.000323442	0.485981	C	T	-0.00052268	0.000320572	0.103006
CD	rs2838517	21	45613825	C	T	-0.1456	0.0162	2.03e-19	C	T	-0.000231008	0.000188174	0.219586	C	T	-0.000534277	0.000186208	0.00411493
CD	rs5754100	22	21916166	C	T	0.1687	0.0206	3.02e-16	C	T	0.000315217	0.000236163	0.181964	C	T	0.000187196	0.000233685	0.423098
CD	rs4821544	22	37258503	C	T	0.0966	0.0171	1.76e-08	C	T	0.000308454	0.0001994	0.121886	C	T	4.4688e-05	0.000197417	0.820919
CD	rs2143178	22	39660829	C	T	-0.2087	0.0223	6.84e-21	C	T	-0.000860397	0.000248983	0.000549103	C	T	-0.000734038	0.000245772	0.00282075
CD	rs62228378	22	39701795	G	A	-0.1513	0.0204	1.25e-13	A	G	4.65061e-06	0.000230787	0.983923	A	G	9.87432e-05	0.000229215	0.666622
CD	rs6808936	3	141109321	G	A	0.0904	0.0161	1.93e-08	G	A	-4.4259e-05	0.000184488	0.810407	G	A	0.000210011	0.000183272	0.251838
CD	rs56116661	3	188401160	C	T	0.1312	0.0212	5.67e-10	T	C	-0.000363663	0.000230224	0.114199	T	C	2.299e-06	0.000227866	0.99195
CD	rs9836291	3	49697459	G	A	-0.1722	0.017	3.77e-24	A	G	0.000498883	0.000202156	0.0135953	A	G	6.49452e-05	0.000199695	0.745014
CD	rs2581828	3	53133149	G	C	-0.0941	0.0162	6.46e-09	G	C	0.00038454	0.000186217	0.0389241	G	C	-0.000169946	0.000184791	0.357748
CD	rs13107325	4	103188709	C	T	-0.2006	0.0284	1.67e-12	T	C	-0.000433922	0.000347361	0.211595	T	C	0.000428486	0.000348155	0.218424
CD	rs62324212	4	123560939	C	A	-0.106	0.0163	8.02e-11	A	C	0.000146878	0.000185423	0.42829	A	C	0.000535751	0.000183538	0.00351169
CD	rs73243877	4	26047616	G	A	0.1164	0.0212	4.12e-08	G	A	-0.000418255	0.00024515	0.0879881	G	A	8.49746e-06	0.000243544	0.972167
CD	rs10036482	5	130429031	G	A	0.1191	0.0188	2.34e-10	A	G	-0.00031042	0.000213614	0.146174	A	G	-0.000290468	0.000211847	0.170338
CD	rs31467	5	131436838	C	T	-0.0968	0.017	1.16e-08	T	C	0.000549991	0.000183314	0.00269786	T	C	-0.000294294	0.000181482	0.104886
CD	rs7737937	5	131614981	G	A	0.1387	0.0232	2.4e-09	A	G	9.52614e-05	0.000260168	0.71425	A	G	-0.000439048	0.000257598	0.0883091
CD	rs2188962	5	131770805	C	T	-0.2004	0.016	5.59e-36	T	C	0.000482468	0.000185485	0.00929315	T	C	0.000554326	0.000183991	0.00258886
CD	rs10477741	5	131795310	G	T	-0.1638	0.0256	1.48e-10	G	T	-0.000221281	0.000275447	0.421772	G	T	-6.00193e-05	0.000274279	0.826786
CD	rs809123	5	132138164	C	T	-0.1162	0.0202	8.83e-09	C	T	-0.00032145	0.00022017	0.14429	C	T	-0.000328471	0.000218397	0.13258
CD	rs181826	5	141526057	C	A	-0.1162	0.0167	3.25e-12	A	C	-0.000194329	0.000189054	0.303998	A	C	-9.06157e-05	0.000187015	0.628005
CD	rs2961703	5	141596996	C	T	0.1911	0.0297	1.23e-10	T	C	0.000345226	0.00032969	0.295044	T	C	0.000316111	0.000326598	0.3331
CD	rs9637870	5	150227615	G	A	-0.2558	0.0275	1.33e-20	A	G	5.31218e-05	0.000347637	0.87855	A	G	0.000740146	0.000344877	0.0318649
CD	rs10046001	5	158814577	G	T	0.1733	0.018	6.2e-22	G	T	-5.44773e-05	0.00020118	0.786554	G	T	0.000256669	0.000199067	0.197275
CD	rs918521	5	158826247	G	A	0.1413	0.0215	4.64e-11	G	A	0.000185419	0.000231853	0.423871	G	A	0.000414714	0.000229545	0.070814
CD	rs755374	5	158829294	C	T	-0.1969	0.0174	1.38e-29	T	C	0.000830568	0.000198328	2.81764e-05	T	C	0.000160355	0.000196629	0.414773
CD	rs62377655	5	158871681	T	A	0.2249	0.0314	7.39e-13	A	T	-0.000524781	0.000344836	0.128054	A	T	-0.00118765	0.000341124	0.000498553
CD	rs1024099	5	39998845	C	A	-0.1027	0.0161	1.72e-10	A	C	5.04402e-05	0.000185677	0.785887	A	C	0.000542545	0.000183701	0.00314321
CD	rs115562049	5	40241451	G	A	-0.3381	0.048	1.96e-12	G	A	-0.0013559	0.000442511	0.00218366	G	A	-0.00126047	0.000438395	0.00403832
CD	rs72748445	5	40245696	C	A	0.1369	0.0181	4.31e-14	A	C	-0.000269375	0.000204074	0.186842	A	C	-0.000484033	0.00020184	0.0164812
CD	rs35828468	5	40318425	C	T	-0.2952	0.022	5.99e-41	T	C	0.000224626	0.000257133	0.382348	T	C	0.000652061	0.000255007	0.0105577
CD	rs6451494	5	40411291	C	T	0.2605	0.0166	8.26e-56	C	T	0.000706711	0.00018776	0.000167337	C	T	0.000653097	0.000186104	0.000449367
CD	rs76798728	5	40480404	T	A	-0.2728	0.0476	1.02e-08	T	A	-0.000242444	0.000489122	0.620126	T	A	-0.000247124	0.000483181	0.609035
CD	rs10076944	5	40496951	G	A	-0.2293	0.0176	6.27e-39	A	G	0.000240391	0.000199891	0.229128	A	G	0.000574811	0.00019767	0.00363866
CD	rs150064688	5	40526195	G	A	0.421	0.0646	7.17e-11	G	A	0.000240286	0.000758519	0.751408	G	A	0.000763024	0.000754497	0.311874
CD	rs11740266	5	40756395	T	A	-0.1733	0.0212	2.91e-16	A	T	2.39506e-05	0.000241366	0.920956	A	T	0.000637567	0.000239315	0.00771943
CD	rs1001684	5	40810426	C	A	0.1423	0.0187	2.57e-14	A	C	-0.00034498	0.000215167	0.108867	A	C	-0.000586234	0.000212772	0.00586573
CD	rs587412	5	41061871	C	T	0.089	0.0161	3.09e-08	C	T	9.21742e-05	0.000184873	0.618074	C	T	0.000117891	0.000183413	0.520378
CD	rs6873866	5	96247810	C	T	-0.1314	0.0164	1.35e-15	C	T	-0.000305939	0.000185159	0.0984732	C	T	-0.000227164	0.000183334	0.21532
CD	rs73516754	6	106459738	C	A	0.1423	0.0169	4.04e-17	C	A	-0.000235544	0.000193997	0.224688	C	A	0.000252472	0.000191818	0.188107
CD	rs6911490	6	106522027	C	T	-0.1137	0.0195	6.02e-09	C	T	0.000136991	0.000223574	0.540053	C	T	-0.000201904	0.000221753	0.362564
CD	rs9482770	6	127443092	C	T	0.0987	0.0162	1.01e-09	C	T	0.000320132	0.000184842	0.0832884	C	T	7.89923e-05	0.000183284	0.666481
CD	rs212408	6	159470242	G	T	0.1136	0.0167	9.12e-12	T	G	-0.000306276	0.000190709	0.108279	T	G	-0.00020948	0.000188823	0.267257
CD	rs35171809	6	167432766	G	A	0.1566	0.0159	9.07e-23	G	A	0.000167514	0.000183943	0.362464	G	A	0.000728252	0.000181923	6.25444e-05
CD	rs41463945	6	167544907	C	T	-0.2005	0.0346	7e-09	C	T	-0.000687537	0.000318255	0.0307483	C	T	-0.000445139	0.000316815	0.16001
CD	rs1012636	6	20674811	G	T	-0.1291	0.0198	7.01e-11	T	G	0.000120442	0.000223924	0.590669	T	G	0.000414888	0.000221129	0.0606256
CD	rs9358372	6	20812588	G	A	0.0936	0.0164	1.25e-08	A	G	1.87944e-05	0.000190147	0.921264	A	G	-7.40653e-05	0.000187699	0.693142
CD	rs7753014	6	21441035	G	C	-0.0989	0.0163	1.39e-09	G	C	-0.000532504	0.000184738	0.00394593	G	C	-2.03732e-05	0.000182778	0.911248
CD	rs112965058	6	30017328	C	T	-0.2935	0.048	9.96e-10	T	C	-0.000807051	0.000567332	0.154872	T	C	0.00013244	0.000562818	0.813964
CD	rs2240069	6	30075641	G	A	-0.1568	0.0252	4.73e-10	G	A	-0.000123621	0.000259944	0.634382	G	A	-0.00048525	0.000257296	0.0593016
CD	rs2517592	6	30093137	C	T	0.1436	0.0217	3.66e-11	T	C	-0.000161039	0.000211859	0.447184	T	C	-0.000531237	0.000209796	0.011337
CD	rs1264372	6	30769726	C	T	0.1404	0.0211	2.83e-11	T	C	-0.000157879	0.000206005	0.443449	T	C	-0.000424093	0.000204828	0.0384084
CD	rs3095344	6	30824649	C	T	0.1024	0.018	1.25e-08	T	C	7.4055e-05	0.000187033	0.692146	T	C	-0.000404566	0.000185222	0.0289466
CD	rs3132558	6	31105466	G	C	-0.1296	0.0186	3.31e-12	G	C	-0.000415792	0.000212656	0.0505568	G	C	-0.000186416	0.000210861	0.376658
CD	rs2524096	6	31236467	G	T	-0.1506	0.0169	5.85e-19	T	G	0.000472492	0.000186004	0.011079	T	G	0.000464977	0.000184158	0.0115747
CD	rs6922309	6	31321238	G	C	-0.2637	0.032	1.89e-16	C	G	3.7344e-05	0.000386866	0.9231	C	G	0.000306141	0.000381791	0.422638
CD	rs2844546	6	31344657	G	A	0.1098	0.0184	2.27e-09	A	G	-0.000179543	0.000190375	0.345631	A	G	-0.000633909	0.000188681	0.00078045
CD	rs1063630	6	31378358	G	T	0.1588	0.0223	1.01e-12	G	T	0.0002552	0.000257098	0.320898	G	T	0.000725929	0.000254235	0.00429947
CD	rs115363051	6	31444174	C	A	0.2882	0.0435	3.35e-11	C	A	0.000279266	0.000562248	0.619405	C	A	0.00168287	0.000559367	0.00262554
CD	rs1052248	6	31556581	T	A	-0.1447	0.0178	3.95e-16	A	T	0.000622042	0.000210499	0.00312631	A	T	0.000666774	0.000208357	0.00137378
CD	rs401775	6	31931137	C	T	0.2023	0.0203	2.17e-23	C	T	0.000411536	0.000241874	0.0888607	C	T	0.000604607	0.000238879	0.011374
CD	rs3134932	6	32186147	C	A	0.1171	0.0176	2.89e-11	A	C	-0.000193312	0.000189089	0.306625	A	C	-0.000351989	0.000187187	0.0600539
CD	rs3134931	6	32190620	C	T	0.1351	0.019	1.25e-12	C	T	0.000321631	0.000199616	0.107128	C	T	0.000818627	0.000198118	3.59757e-05
CD	rs399950	6	32196940	C	T	-0.141	0.0223	2.54e-10	T	C	0.000463016	0.000242888	0.0566144	T	C	0.000517816	0.00024069	0.0314476
CD	rs145568234	6	32247045	G	T	0.8602	0.0633	4.31e-42	G	T	0.00364522	0.000648891	1.93918e-08	G	T	0.00361616	0.00063584	1.29308e-08
CD	rs2073045	6	32339548	G	A	0.1032	0.0188	4.28e-08	A	G	-7.89703e-05	0.00019774	0.689626	A	G	-0.00032683	0.000195746	0.094987
CD	rs9501400	6	32394184	G	A	-0.1423	0.0254	2.21e-08	A	G	0.000371355	0.000275848	0.178231	A	G	0.00104773	0.000273357	0.000126725
CD	rs2760994	6	32574308	C	T	0.1112	0.0171	8.1e-11	T	C	-0.000115954	0.000185989	0.532993	T	C	-0.00025178	0.000184176	0.171608
CD	rs9273369	6	32626484	C	T	-0.2227	0.0276	7.25e-16	C	T	-0.000334	0.000258075	0.1956	C	T	-0.0005731	0.000256185	0.0252836
CD	rs2008560	6	32729734	G	C	0.1082	0.0169	1.63e-10	G	C	0.000524681	0.000183905	0.00433143	G	C	0.000251847	0.000182379	0.16731
CD	rs2621366	6	32768980	C	A	-0.1345	0.017	2.23e-15	A	C	0.000246407	0.000200278	0.218578	A	C	0.000433315	0.000198126	0.028739
CD	rs28724899	6	32829141	T	A	0.1483	0.0239	5.62e-10	T	A	0.000328978	0.000270807	0.224443	T	A	0.000802153	0.000268951	0.00285918
CD	rs11965964	6	33020604	C	T	-0.3044	0.0529	8.83e-09	T	C	0.000997007	0.000643339	0.121206	T	C	0.00164022	0.000639145	0.0102806
CD	rs1321859	6	91011673	C	T	0.1049	0.0172	1.18e-09	T	C	-2.21015e-05	0.000193506	0.909067	T	C	3.61777e-05	0.000191979	0.850527
CD	rs9656588	7	50306780	C	T	0.1183	0.0173	8.73e-12	C	T	0.000461626	0.000195016	0.0179282	C	T	0.000454194	0.000193062	0.0186444
CD	rs4380956	8	126529074	G	A	-0.132	0.0165	1.15e-15	A	G	-0.000101097	0.000189009	0.592734	A	G	0.000244496	0.000187627	0.192543
CD	rs938650	8	129552540	G	A	0.1747	0.0247	1.65e-12	A	G	-0.0005923	0.000273924	0.0305985	A	G	-0.000350457	0.000271508	0.196781
CD	rs79832570	8	145097720	C	T	0.2234	0.0344	8.9e-11	C	T	0.00048339	0.000334734	0.148713	C	T	-0.000212927	0.000333492	0.523163
CD	rs113106667	9	117541713	C	A	-0.3738	0.0675	3.08e-08	C	A	-0.00162376	0.000660674	0.0139825	C	A	-0.000556322	0.000660141	0.39938
CD	rs10114470	9	117547772	C	T	0.1687	0.0177	1.76e-21	C	T	0.000170142	0.000197235	0.388339	C	T	0.000139704	0.000195424	0.474688
CD	rs12237626	9	117576300	G	A	-0.1576	0.0234	1.69e-11	A	G	1.18701e-05	0.000276382	0.965743	A	G	5.66953e-05	0.000273344	0.835687
CD	rs3181356	9	117692882	C	T	-0.129	0.0189	7.88e-12	T	C	0.000112502	0.000226706	0.619722	T	C	0.000164969	0.0002243	0.462046
CD	rs4077515	9	139266496	C	T	-0.1848	0.0162	3.15e-30	T	C	0.000152766	0.000185266	0.409613	T	C	0.000500104	0.000183624	0.00645964
CD	rs7870145	9	139401565	G	A	-0.1656	0.0271	1e-09	G	A	3.2821e-05	0.000288581	0.90945	G	A	-0.000645543	0.000286095	0.0240471
CD	rs1887428	9	4984530	G	C	0.166	0.0169	8.54e-23	C	G	-0.000448545	0.000192292	0.0196692	C	G	-0.000650285	0.000190664	0.00064826
CD	rs9501641	6	32450319	C	T	-0.3027	0.0432	2.57e-12	NA	NA	NA	NA	NA	NA	NA	NA	NA	NA

## Sheet: Table S5
Table S5. SNPs used to construct polygenic risk score (PRS) of ulcerative colitis (UC)
Disease	SNP	chr	pos	Both sex					Male					Female
				alt	ref	beta	se	pval	alt	ref	beta	se	pval	alt	ref	beta	se	pval
UC	rs1336900	1	150679033	G	A	0.0887	0.0163	4.95e-08	A	G	-0.000323204	0.000258674	0.211496	A	G	-6.51691e-05	0.000237916	0.784149
UC	rs79051659	1	151757843	G	A	-0.1605	0.0264	1.3e-09	A	G	0.000217468	0.000418435	0.60326	A	G	-0.000429788	0.000385703	0.265153
UC	rs4845604	1	151801680	G	A	0.1608	0.0239	1.57e-11	A	G	-0.00049394	0.000363703	0.174438	A	G	-0.00139481	0.000333804	2.93513e-05
UC	rs6658353	1	161469054	G	C	0.1569	0.016	1.17e-22	C	G	-0.000976795	0.000254436	0.000123549	C	G	-0.00096717	0.000234129	3.61451e-05
UC	rs79568124	1	161502849	G	A	0.2115	0.0262	6.56e-16	G	A	0.000670687	0.000414786	0.105891	G	A	0.00183218	0.000380216	1.44542e-06
UC	rs2816980	1	200078035	G	T	-0.1941	0.026	9.18e-14	T	G	0.00160744	0.000401608	6.2703e-05	T	G	0.000737787	0.000368289	0.0451484
UC	rs10917534	1	20087038	C	T	-0.1011	0.0165	8.92e-10	T	C	0.000292763	0.000264316	0.268027	T	C	0.000713259	0.000243499	0.00339859
UC	rs7554511	1	200877562	C	A	0.1448	0.0178	4.27e-16	A	C	-0.000924139	0.000275845	0.000807666	A	C	-0.00084955	0.000254004	0.000824067
UC	rs4655208	1	20128536	C	T	-0.1671	0.022	2.7e-14	C	T	-0.000718811	0.000277072	0.00947887	C	T	-0.000798942	0.000254858	0.00171969
UC	rs1317209	1	20140036	G	A	-0.1818	0.0203	2.9e-19	A	G	0.00113513	0.000337038	0.000757432	A	G	0.00146799	0.000309161	2.05274e-06
UC	rs3820328	1	20142447	G	A	-0.1662	0.0164	3.66e-24	G	A	-0.000662868	0.000259705	0.0106996	G	A	-0.00130789	0.000238842	4.35688e-08
UC	rs72658548	1	20147269	G	A	0.3388	0.0501	1.34e-11	A	G	-0.000665185	0.00068821	0.333774	A	G	-0.00130484	0.000629013	0.0380415
UC	rs7551717	1	20153661	C	T	-0.1539	0.0242	1.89e-10	C	T	-0.000986946	0.000356274	0.00560298	C	T	-0.00110342	0.000326302	0.000720786
UC	rs10737481	1	20171514	G	T	0.2173	0.0159	2.56e-42	G	T	0.000876165	0.000253137	0.000537855	G	T	0.00100186	0.000232917	1.69828e-05
UC	rs77522209	1	20173440	T	A	0.1947	0.0309	3e-10	T	A	0.00110199	0.000532547	0.0385205	T	A	0.00174981	0.000490686	0.000362506
UC	rs79474100	1	206914649	T	A	-0.2763	0.0468	3.51e-09	A	T	0.000670512	0.000672344	0.318632	A	T	0.000719937	0.000619517	0.245199
UC	rs3024493	1	206943968	C	A	-0.21	0.0209	7.46e-24	A	C	0.00149449	0.000349844	1.93951e-05	A	C	0.00124598	0.000321672	0.000107348
UC	rs34920465	1	22700351	G	A	-0.1708	0.0213	9.01e-16	G	A	-0.00120137	0.000331241	0.000286969	G	A	-0.000530911	0.000305276	0.0820154
UC	rs7544646	1	2496649	G	C	-0.1168	0.016	2.53e-13	G	C	-0.00022763	0.000253991	0.37014	G	C	-0.000289804	0.00023281	0.213203
UC	rs12031203	1	67696547	G	A	-0.1768	0.0167	3.04e-26	A	G	0.000831824	0.000273888	0.00238907	A	G	0.00103992	0.000251383	3.52349e-05
UC	rs11209026	1	67705958	G	A	0.483	0.0358	2e-41	A	G	-0.00155902	0.000505056	0.00202332	A	G	-0.00182113	0.000465019	8.99713e-05
UC	rs10889680	1	67768593	T	A	-0.1624	0.0286	1.39e-08	A	T	0.000794685	0.0004114	0.0534028	A	T	0.000970384	0.000380152	0.0106923
UC	rs7523335	1	8180210	G	A	0.1389	0.021	3.42e-11	A	G	-0.00087773	0.000326637	0.00720678	A	G	0.00023003	0.000298962	0.44164
UC	rs7911680	10	101293468	C	A	-0.1525	0.0159	6.71e-22	C	A	-0.000674628	0.000253036	0.00767369	C	A	-0.000685419	0.000232124	0.00314936
UC	rs7911117	10	27179596	G	T	-0.1342	0.0239	1.84e-08	G	T	-8.55205e-05	0.000373496	0.81889	G	T	0.000182982	0.000342962	0.593665
UC	rs10761659	10	64445564	G	A	0.1276	0.016	1.33e-15	G	A	0.000852104	0.000253772	0.000785966	G	A	0.000635352	0.000232864	0.00636446
UC	rs11215013	11	114356009	C	T	-0.4129	0.0678	1.11e-09	T	C	-0.00155282	0.00103598	0.133903	T	C	-0.00124874	0.000956192	0.19157
UC	rs2045241	11	114428783	G	A	0.1063	0.0169	2.83e-10	A	G	-0.000162218	0.000270245	0.548331	A	G	-0.000315896	0.000247375	0.201605
UC	rs2212434	11	76281593	C	T	-0.1252	0.0159	2.8e-15	T	C	0.000422806	0.000254709	0.0969253	T	C	0.000763961	0.00023376	0.00108277
UC	rs12825700	12	68492980	G	A	-0.1889	0.0161	7.33e-32	A	G	0.000483336	0.000260301	0.0633371	A	G	0.000895608	0.000239158	0.000180567
UC	rs1359946	13	27536972	G	A	-0.1571	0.0202	6.58e-15	A	G	0.00142961	0.000328901	1.38323e-05	A	G	-0.000238865	0.000304683	0.433053
UC	rs56062135	15	67455630	C	T	-0.1078	0.0184	4.66e-09	T	C	0.00050435	0.000297245	0.089746	T	C	0.00028952	0.000273831	0.290379
UC	rs11645239	16	23847062	G	C	-0.1174	0.02	4.14e-09	G	C	-0.000540042	0.000315203	0.0866569	G	C	-0.000321874	0.000290016	0.267066
UC	rs7203363	16	68587692	T	A	-0.1071	0.0189	1.41e-08	A	T	0.000125929	0.000299879	0.674535	A	T	0.000411733	0.000276164	0.135989
UC	rs16940186	16	86009740	C	T	0.1357	0.0214	2.19e-10	C	T	0.000506638	0.000358782	0.157921	C	T	0.000790105	0.000328849	0.0162781
UC	rs12936409	17	38043649	C	T	-0.1365	0.0158	5.62e-18	T	C	0.000302595	0.000253486	0.232583	T	C	0.000621174	0.000232289	0.00749261
UC	rs6503695	17	40499533	C	T	-0.108	0.0167	1.04e-10	C	T	-0.000142207	0.000265099	0.591661	C	T	-0.00057368	0.000243147	0.0183059
UC	rs11651246	17	40759937	G	T	0.147	0.0219	2.01e-11	G	T	4.61229e-06	0.000338831	0.989139	G	T	0.000774859	0.000311773	0.0129439
UC	rs8073117	17	70639396	G	A	0.1548	0.0225	6.4e-12	A	G	-0.000177742	0.000357087	0.618657	A	G	-7.74574e-05	0.000328225	0.813442
UC	rs78064630	19	10562802	G	A	-0.1759	0.0308	1.08e-08	A	G	0.0009562	0.00047236	0.0429404	A	G	0.000868052	0.00043727	0.0471278
UC	rs10405944	19	33728001	C	T	-0.0926	0.0169	3.98e-08	C	T	-0.000265229	0.00025728	0.30259	C	T	-0.000593825	0.000235944	0.0118431
UC	rs10408351	19	33754044	G	A	-0.1548	0.0204	2.92e-14	A	G	0.000552755	0.000307571	0.0723116	A	G	0.000255136	0.000282195	0.365937
UC	rs16830407	2	199625153	G	A	-0.1078	0.0166	7.62e-11	A	G	0.000221948	0.000267599	0.406875	A	G	0.000314151	0.000245611	0.200878
UC	rs62180181	2	199852010	C	T	-0.1226	0.0171	8.08e-13	T	C	0.000772672	0.000274247	0.00484145	T	C	0.000592075	0.000251749	0.0186813
UC	rs1811711	2	228670476	G	C	-0.1299	0.0223	6.09e-09	G	C	-0.000891406	0.000321745	0.00559697	G	C	-0.000718615	0.000296084	0.0152223
UC	rs4676408	2	241574401	G	A	-0.1433	0.0167	1.19e-17	A	G	0.00103524	0.000254145	4.63465e-05	A	G	0.000634434	0.000233256	0.0065307
UC	rs7608697	2	61204641	C	A	0.1597	0.0161	3.03e-23	C	A	0.000406381	0.000261096	0.119605	C	A	0.000636745	0.000239669	0.00788992
UC	rs4671401	2	61473148	C	T	-0.1035	0.0183	1.61e-08	C	T	-6.72375e-05	0.000286599	0.814515	C	T	-0.000419505	0.000263297	0.1111
UC	rs6017342	20	43065028	C	A	0.1944	0.017	3.95e-30	C	A	0.00114833	0.000252757	5.54395e-06	C	A	0.000838779	0.000232311	0.000305588
UC	rs6103738	20	43067514	G	C	0.1202	0.0188	1.46e-10	G	C	0.000431397	0.000301172	0.152033	G	C	0.00031469	0.00027651	0.255089
UC	rs6090461	20	62211185	C	T	0.1148	0.0197	5.85e-09	T	C	-0.000731404	0.000307234	0.0172851	T	C	-0.000625462	0.000282497	0.0268269
UC	rs6062496	20	62329099	G	A	-0.1359	0.0163	8.97e-17	A	G	0.000537361	0.000253549	0.0340618	A	G	0.000251702	0.000233096	0.280224
UC	rs1736161	21	16833222	G	A	0.1227	0.0161	2.22e-14	A	G	-0.000657307	0.000254576	0.00982471	A	G	-0.0004002	0.00023415	0.0874218
UC	rs2836881	21	40466299	G	T	0.2217	0.0186	1.11e-32	T	G	-0.00101269	0.00028604	0.000399659	T	G	-0.00144037	0.00026319	4.43661e-08
UC	rs12627242	21	40467879	C	T	-0.1378	0.0234	4.15e-09	T	C	0.00109575	0.000366101	0.00276272	T	C	0.000414373	0.000335336	0.216573
UC	rs7279465	21	40476413	C	T	-0.1352	0.0211	1.37e-10	C	T	-0.000657783	0.000316656	0.0377771	C	T	-0.000583282	0.000291551	0.0454352
UC	rs2838517	21	45613825	C	T	-0.1177	0.016	1.78e-13	C	T	-0.000643893	0.000259065	0.0129396	C	T	-0.00103185	0.000237744	1.4243e-05
UC	rs4993442	22	30253256	G	T	0.0988	0.0179	3.54e-08	T	G	0.000237227	0.000292943	0.418052	T	G	-0.000381692	0.000269136	0.156131
UC	rs138788	22	35729721	G	A	-0.0896	0.0162	2.95e-08	A	G	0.000378165	0.000256366	0.140187	A	G	-6.48209e-05	0.000236122	0.783683
UC	rs9611131	22	39662480	C	T	-0.1494	0.0227	5.11e-11	C	T	-0.000299954	0.000360282	0.405097	C	T	-0.00139923	0.000330062	2.2432e-05
UC	rs62228377	22	39701703	G	A	-0.1274	0.0206	6.65e-10	A	G	0.00138361	0.000317719	1.33254e-05	A	G	0.000395556	0.000292701	0.176569
UC	rs137845	22	50439430	G	A	0.1011	0.0158	1.5e-10	G	A	0.000556091	0.000252998	0.0279498	G	A	0.000514324	0.000232954	0.0272568
UC	rs3895736	3	48658467	C	A	-0.1305	0.021	4.76e-10	A	C	9.09394e-05	0.000331982	0.78414	A	C	0.000200967	0.000304138	0.508757
UC	rs1131095	3	49714225	C	T	0.1593	0.0168	2.18e-21	C	T	0.000385981	0.000278393	0.165608	C	T	0.00115151	0.000255022	6.32538e-06
UC	rs17715902	5	134451465	G	A	-0.0974	0.0166	4.62e-09	A	G	0.00054078	0.000269357	0.0446801	A	G	0.000592075	0.000247704	0.0168377
UC	rs17656349	5	149605994	C	T	-0.09	0.0159	1.54e-08	T	C	0.000450226	0.000254367	0.0767314	T	C	5.68949e-05	0.000234597	0.808376
UC	rs116724447	5	158581640	G	A	0.339	0.0572	3.01e-09	A	G	-0.00056167	0.000802673	0.484085	A	G	-7.31623e-05	0.000733922	0.920593
UC	rs983825	5	158774965	C	A	-0.1592	0.0172	2.11e-20	A	C	0.000423883	0.000271661	0.118682	A	C	0.000494162	0.000249119	0.0472978
UC	rs755374	5	158829294	C	T	-0.1714	0.0171	9.73e-24	T	C	0.000316908	0.000273062	0.245818	T	C	0.000462465	0.000251054	0.0654627
UC	rs62377655	5	158871681	T	A	0.1925	0.0306	3.27e-10	A	T	-0.00091892	0.000474752	0.0529208	A	T	-0.000878705	0.000435556	0.0436516
UC	rs67111717	5	176790162	G	A	0.0944	0.0171	3.27e-08	G	A	0.000513198	0.000269161	0.0565664	G	A	0.000125577	0.000246511	0.610461
UC	rs6889364	5	40347469	G	A	-0.1318	0.0228	7.87e-09	A	G	0.0004167	0.000376955	0.268973	A	G	0.000448897	0.000346356	0.194958
UC	rs72704802	5	554211	C	T	0.1223	0.0206	2.89e-09	T	C	5.12256e-05	0.000319338	0.872557	T	C	-0.000117962	0.000292826	0.687066
UC	rs13200059	6	111943234	G	A	-0.2944	0.0436	1.48e-11	A	G	0.00100483	0.000755917	0.183754	A	G	0.000206091	0.000689121	0.764892
UC	rs6933404	6	137959235	C	T	0.1486	0.0188	2.69e-15	C	T	0.000687525	0.000306444	0.0248618	C	T	0.00104616	0.000280928	0.000196196
UC	rs113986290	6	19781009	C	T	0.3066	0.0531	7.59e-09	T	C	-0.000978092	0.000830516	0.238921	T	C	-0.00136634	0.000776507	0.0784771
UC	rs4711173	6	28514583	C	T	0.1166	0.0201	7.19e-09	C	T	0.000585681	0.000320921	0.0680029	C	T	0.000227529	0.000293406	0.438061
UC	rs3823377	6	29944253	C	A	-0.1482	0.0196	3.6e-14	A	C	0.000219338	0.000270413	0.417298	A	C	0.00111452	0.00024823	7.13065e-06
UC	rs12525616	6	30900435	G	T	-0.2761	0.0473	5.37e-09	T	G	-0.00137156	0.000972572	0.158471	T	G	0.000349706	0.000886564	0.693249
UC	rs141725002	6	30971976	G	A	-0.4885	0.0883	3.16e-08	A	G	-4.57929e-05	0.00143935	0.97462	A	G	0.00179479	0.00130745	0.169832
UC	rs2517554	6	30993499	C	T	0.1091	0.0178	8.86e-10	T	C	-0.000234692	0.00025914	0.365119	T	C	0.000279672	0.000238581	0.241107
UC	rs3094201	6	31092763	G	A	-0.1332	0.0162	1.61e-16	G	A	-0.00107554	0.000261179	3.82316e-05	G	A	0.000141975	0.000239632	0.553537
UC	rs9263719	6	31096575	C	T	0.1692	0.0269	3.09e-10	T	C	-0.00099517	0.000445187	0.0253927	T	C	-7.60439e-05	0.00040938	0.852638
UC	rs61444472	6	31102305	G	A	0.5303	0.0758	2.54e-12	G	A	-0.00126607	0.00151167	0.402297	G	A	0.0023378	0.00139812	0.0945073
UC	rs17190769	6	31127037	C	T	-0.2341	0.0416	1.83e-08	T	C	-0.00100154	0.000709175	0.157875	T	C	0.000432427	0.000650515	0.506214
UC	rs73728280	6	31141827	G	A	0.3219	0.0585	3.75e-08	A	G	-0.000768135	0.00085729	0.370252	A	G	0.000320165	0.000788401	0.684674
UC	rs117292830	6	31218268	G	A	-0.4948	0.0495	1.58e-23	A	G	0.00103393	0.000781746	0.185975	A	G	0.00153618	0.00072277	0.0335541
UC	rs9264584	6	31236034	C	T	-0.1142	0.0179	1.94e-10	C	T	-0.00064192	0.000268264	0.0167185	C	T	-0.000468416	0.000246015	0.0569098
UC	rs72502570	6	31321479	G	A	0.1477	0.0249	2.86e-09	G	A	0.000682542	0.000419962	0.104112	G	A	0.000286147	0.000385533	0.45796
UC	rs2442737	6	31329303	G	A	0.14	0.0198	1.57e-12	A	G	-0.000499013	0.000282507	0.0773355	A	G	0.000250685	0.000259612	0.334239
UC	rs2523671	6	31437318	C	T	0.1525	0.0186	2.74e-16	T	C	-0.000131408	0.000285624	0.645463	T	C	-0.000430493	0.000261907	0.100243
UC	rs77108272	6	31455675	C	A	-0.5479	0.062	1.02e-18	A	C	0.00023338	0.00129876	0.857393	A	C	4.8751e-05	0.00118553	0.967199
UC	rs3828903	6	31464739	G	A	-0.1028	0.0167	7.63e-10	A	G	8.706e-05	0.000273886	0.750584	A	G	0.000462264	0.000251957	0.0665531
UC	rs57256697	6	31500495	C	T	-0.3794	0.0469	6.16e-16	T	C	-0.00104254	0.00090175	0.24763	T	C	0.000867082	0.000834469	0.298768
UC	rs114751021	6	31504194	G	A	0.4876	0.0506	5.38e-22	G	A	0.00389401	0.000764453	3.5125e-07	G	A	0.00100589	0.000699082	0.150188
UC	rs2269476	6	31507938	G	A	0.134	0.0206	8.02e-11	A	G	-0.000304819	0.000332455	0.359211	A	G	0.000539191	0.000304483	0.0765889
UC	rs45593732	6	31583725	C	T	-0.4903	0.0523	6.35e-21	T	C	0.00265573	0.000857861	0.0019634	T	C	0.00243389	0.000786438	0.00196954
UC	rs2607013	6	31820400	C	T	-0.1534	0.0208	1.55e-13	T	C	0.000763178	0.00033099	0.0211262	T	C	0.000612585	0.000302636	0.0429548
UC	rs12614	6	31914179	C	T	0.2205	0.0296	8.84e-14	T	C	-0.000620322	0.000458106	0.175707	T	C	-0.000501544	0.00042043	0.232898
UC	rs437179	6	31929014	C	A	-0.2051	0.017	1.63e-33	C	A	-0.00117098	0.000269262	1.36928e-05	C	A	-0.000126227	0.00024773	0.610378
UC	rs9469089	6	32146657	G	C	-0.1562	0.0233	1.89e-11	C	G	0.000541762	0.000347007	0.118468	C	G	0.000700948	0.000319113	0.0280535
UC	rs438475	6	32186245	G	A	0.1386	0.0238	5.7e-09	A	G	-0.000508003	0.000349794	0.146422	A	G	-0.00018558	0.000320189	0.562188
UC	rs434841	6	32191041	G	A	0.1214	0.0196	6.11e-10	A	G	-0.000516764	0.000275223	0.0604355	A	G	-0.000495638	0.000253485	0.0505501
UC	rs3134929	6	32192107	G	C	-0.1791	0.0218	2.42e-16	G	C	-0.00111925	0.000315173	0.000383564	G	C	-0.000735185	0.000289061	0.0109802
UC	rs9501607	6	32198707	C	T	0.1963	0.0332	3.43e-09	T	C	-0.000152968	0.000465298	0.742344	T	C	-0.000259938	0.000426905	0.542598
UC	rs145568234	6	32247045	G	T	1.0972	0.0632	1.94e-67	G	T	0.00943368	0.000893147	4.54182e-26	G	T	0.00587663	0.000811798	4.53583e-13
UC	rs3806155	6	32373378	T	A	-0.3392	0.0579	4.72e-09	T	A	-0.00179246	0.000683586	0.00873863	T	A	-0.00133506	0.000627104	0.0332608
UC	rs3129883	6	32410137	C	T	-0.1802	0.0199	1.12e-19	C	T	-0.000541411	0.000290783	0.0626179	C	T	-0.000481109	0.000268409	0.0730625
UC	rs9469112	6	32415153	C	T	-0.2109	0.0236	3.64e-19	T	C	0.00148587	0.000333159	8.2035e-06	T	C	0.00110103	0.000305221	0.000309435
UC	rs58667488	6	32431785	C	A	-0.4532	0.07	9.48e-11	C	A	-0.000607805	0.000950585	0.522563	C	A	-0.00234156	0.000865326	0.0068108
UC	rs140926846	6	32453395	T	A	0.412	0.075	3.87e-08	T	A	0.000884765	0.00136671	0.517393	T	A	-4.81603e-05	0.00128928	0.970203
UC	rs9271176	6	32578127	G	A	-0.3495	0.0173	4.2e-91	G	A	-0.00203331	0.000269164	4.23639e-14	G	A	-0.00152315	0.00024781	7.93985e-10
UC	rs1281935	6	32583820	G	T	0.3185	0.0369	6.55e-18	T	G	-0.00090498	0.000443936	0.0414979	T	G	-0.000305817	0.000407594	0.453076
UC	rs28383312	6	32587090	C	T	0.29	0.0173	8.31e-63	T	C	-0.00157314	0.000257519	1.00574e-09	T	C	-0.000529074	0.000236881	0.0255174
UC	rs79550239	6	32620628	G	A	-0.2771	0.0316	1.71e-18	A	G	0.00106825	0.000465759	0.0218169	A	G	0.000817375	0.000429676	0.0571326
UC	rs17205373	6	32626210	G	C	-0.1565	0.0267	4.6e-09	G	C	-0.00122306	0.000380544	0.0013093	G	C	-2.09139e-05	0.000348301	0.952119
UC	rs11751495	6	32638199	G	C	-0.2882	0.0519	2.83e-08	G	C	-0.00088947	0.000798045	0.26504	G	C	-0.00113645	0.000723061	0.116018
UC	rs9275327	6	32666802	C	T	0.2982	0.026	2e-30	T	C	-0.00182426	0.00037941	1.52463e-06	T	C	-0.00135225	0.000350176	0.000112668
UC	rs9275601	6	32682664	C	T	0.1102	0.0199	2.94e-08	T	C	-0.000215661	0.000255547	0.398716	T	C	-0.000417421	0.000234488	0.0750547
UC	rs6915986	6	32683898	C	T	0.404	0.0616	5.45e-11	C	T	-5.27585e-05	0.00114107	0.963122	C	T	0.000508522	0.00104161	0.625404
UC	rs9276437	6	32714168	G	A	-0.2955	0.0321	3.88e-20	G	A	-0.00172835	0.000407862	2.26064e-05	G	A	-0.000852962	0.000373459	0.0223756
UC	rs9469268	6	32719635	G	A	-0.3171	0.0358	8.36e-19	A	G	0.00202339	0.000488538	3.44882e-05	A	G	0.00214322	0.000445961	1.54219e-06
UC	rs114920411	6	32723308	G	A	-0.2632	0.0419	3.19e-10	A	G	0.00167918	0.000663525	0.0113846	A	G	0.00069398	0.000618338	0.261724
UC	rs2857115	6	32778281	G	A	-0.1324	0.0175	4.38e-14	A	G	0.00107524	0.000289872	0.000207847	A	G	0.000748992	0.00026558	0.00479968
UC	rs4148876	6	32796793	G	A	0.3049	0.0337	1.34e-19	A	G	-0.00212388	0.000497212	1.94213e-05	A	G	-0.000731894	0.000456413	0.108808
UC	rs241426	6	32804553	T	A	0.1004	0.0163	6.58e-10	A	T	-0.000459739	0.000260014	0.0770414	A	T	-0.000809703	0.000239036	0.000705822
UC	rs9276822	6	32829320	C	A	-0.2012	0.0262	1.42e-14	C	A	-0.00103859	0.000405414	0.0104141	C	A	-0.000488234	0.000370926	0.188089
UC	rs154974	6	32900616	G	C	0.1084	0.0181	2.05e-09	C	G	-0.000703509	0.000265721	0.00810849	C	G	4.49383e-05	0.000244089	0.85393
UC	rs11757367	6	32962882	G	A	0.1534	0.0232	4.17e-11	A	G	-0.00103927	0.00033732	0.00206364	A	G	-0.000851652	0.000311127	0.00619494
UC	rs9277153	6	33021775	T	A	0.123	0.0199	7.03e-10	A	T	-0.000476853	0.000309396	0.12326	A	T	-5.66286e-05	0.000283783	0.841833
UC	rs3097666	6	33022788	G	C	0.2154	0.0304	1.46e-12	C	G	-0.000874686	0.000434467	0.0440913	C	G	-0.000411628	0.000398367	0.30147
UC	rs9277403	6	33051467	G	A	-0.1726	0.0194	4.96e-19	G	A	-0.000512201	0.00027454	0.0620898	G	A	-1.43129e-05	0.00025228	0.954757
UC	rs2301989	7	107443871	G	A	0.1294	0.0161	1.08e-15	A	G	-0.000936947	0.00025785	0.000279479	A	G	-0.000623736	0.000237021	0.00849985
UC	rs10272963	7	107486902	C	T	0.1512	0.016	4.11e-21	T	C	-0.000385519	0.000254925	0.130463	T	C	-0.000774469	0.000234762	0.000970641
UC	rs4728142	7	128573967	G	A	-0.0995	0.0158	3.23e-10	A	G	0.000396544	0.000254201	0.118771	A	G	0.000733357	0.000234018	0.00172604
UC	rs798506	7	2788912	C	T	-0.1206	0.0179	1.47e-11	C	T	-0.00066951	0.000278656	0.0162783	C	T	-0.00071636	0.000256568	0.00523751
UC	rs10817678	9	117579457	G	A	-0.1332	0.017	4.42e-15	A	G	0.000712279	0.00026816	0.00790406	A	G	0.00010266	0.000246406	0.67695
UC	rs3812565	9	139272502	C	T	0.1335	0.016	6.5e-17	C	T	0.000501306	0.000258007	0.0520186	C	T	0.000390843	0.000237181	0.0993818
UC	rs7870145	9	139401565	G	A	-0.1595	0.026	8.97e-10	G	A	-0.000222276	0.000397304	0.575848	G	A	-0.0011275	0.000365282	0.00202439
UC	rs1887428	9	4984530	G	C	0.167	0.0166	9.65e-24	C	G	-0.000427343	0.000264741	0.106487	C	G	-0.000556571	0.000243444	0.0222415
UC	rs822341	9	5453396	C	T	-0.1063	0.018	3.33e-09	C	T	-0.000443886	0.000289539	0.125258	C	T	-0.00021947	0.000265361	0.408203
UC	rs1265098	6	31106177	C	T	-0.1646	0.0203	4.71e-16	NA	NA	NA	NA	NA	NA	NA	NA	NA	NA
UC	rs116227766	6	31219650	C	T	-0.3891	0.0605	1.26e-10	NA	NA	NA	NA	NA	NA	NA	NA	NA	NA

## Sheet: Table S6
Table S6. SNPs used to construct polygenic risk score (PRS) of multiple sclerosis (MS)
Disease	SNP	chr	pos	Both sex				Male					Female
				alt	ref	beta	pval	alt	ref	beta	se	pval	alt	ref	beta	se	pval
MS	rs11578655	1	101412902	T	G	-0.0833816	2.89e-08	G	T	0.000228685	0.000250212	0.360736	G	T	0.000135826	0.000343949	0.692917
MS	rs10801908	1	117090493	C	T	0.261595	4.55e-70	T	C	-0.000679253	0.000254113	0.00751761	T	C	-0.000908874	0.000344731	0.008378
MS	rs1801133	1	11856378	A	G	-0.102033	2.31e-15	A	G	-5.76263e-05	0.000172513	0.738349	A	G	-0.000267895	0.000237867	0.260066
MS	rs483180	1	120267505	G	C	-0.0822952	1.45e-17	G	C	-0.000266976	0.000175233	0.127625	G	C	-0.000406016	0.000241084	0.0921585
MS	rs2317231	1	157686337	G	T	0.076961	3.25e-16	T	G	-0.000276886	0.000164747	0.0928288	T	G	-0.000504893	0.000226662	0.0259137
MS	rs3737798	1	160389984	A	G	0.07139	4.12e-14	G	A	-7.67519e-05	0.000163082	0.637903	G	A	-0.000236281	0.000225103	0.293878
MS	rs6427540	1	160634588	C	T	0.10075	1.48e-09	T	C	-0.000219791	0.000237138	0.354006	T	C	-0.000264618	0.000325442	0.41616
MS	rs983494	1	160703965	G	A	0.0843411	6.1e-16	A	G	-0.000410816	0.000188239	0.0290807	A	G	-0.000626183	0.000259139	0.015676
MS	rs1323292	1	192541021	A	G	0.151003	3.64e-33	A	G	0.000557554	0.000211341	0.0083362	A	G	0.000972069	0.000291278	0.00084626
MS	rs59655222	1	200875897	T	C	0.0998453	5.66e-21	C	T	0.000156136	0.00017907	0.383249	C	T	-0.000738719	0.0002469	0.00277209
MS	rs9308424	1	212877776	A	G	-0.0899247	9.25e-14	A	G	0.000133109	0.000175492	0.448158	A	G	-0.000420681	0.000241941	0.0820766
MS	rs6670198	1	2520527	C	T	-0.127833	1.54e-36	C	T	-0.000139876	0.000170382	0.411673	C	T	-0.000574054	0.000234076	0.0141904
MS	rs6672420	1	25291010	T	A	-0.0618754	1.48e-09	T	A	-6.18837e-05	0.000162884	0.704001	T	A	8.63012e-05	0.000223821	0.699807
MS	rs2986736	1	6512547	T	C	-0.113169	8.91e-17	C	T	0.000358885	0.000205106	0.0801632	C	T	0.000712031	0.000282907	0.0118422
MS	rs72922276	1	65429319	G	A	0.151862	1.41e-15	A	G	-0.000539114	0.000260685	0.0386357	A	G	-0.000710612	0.000359735	0.0482267
MS	rs11161550	1	85682020	A	G	-0.058689	2.06e-09	A	G	-3.06501e-06	0.000164696	0.985152	A	G	-0.000252235	0.000226817	0.266113
MS	rs35486093	1	85729820	A	G	-0.189951	2.27e-31	G	A	0.000175398	0.000284883	0.538104	G	A	0.000597941	0.000392175	0.127341
MS	rs12133753	1	92222089	C	T	0.123102	1.67e-16	T	C	-0.000510447	0.000214731	0.0174482	T	C	-0.000636544	0.000294738	0.0307975
MS	rs11809700	1	93152635	C	T	-0.122168	2.95e-30	T	C	0.000373589	0.000184774	0.0431913	T	C	0.000704783	0.000253942	0.00551438
MS	rs1415069	1	93426869	C	G	-0.071496	3.32e-08	C	G	0.000146476	0.000223956	0.513088	C	G	-2.70762e-05	0.000307597	0.929857
MS	rs1087056	10	31395761	G	A	-0.0844692	3.5e-19	A	G	0.000141541	0.000165766	0.393184	A	G	0.000333788	0.000228367	0.143844
MS	rs11256593	10	6117322	T	C	0.187309	2.96e-65	T	C	0.000529877	0.000164208	0.0012518	T	C	0.000175796	0.000225556	0.435751
MS	rs61863928	10	64449549	G	T	0.0852598	3.01e-16	T	G	-0.00014876	0.000172424	0.388271	T	G	0.000460605	0.000236479	0.0514447
MS	rs17741873	10	75653800	G	T	0.0657877	4.69e-08	T	G	-0.000201202	0.00021162	0.341723	T	G	9.90251e-05	0.000290942	0.733586
MS	rs1399180	10	8098719	T	C	-0.0965109	7.16e-11	C	T	0.000292858	0.000217195	0.177543	C	T	0.000580796	0.000298451	0.0516518
MS	rs1250551	10	81059335	G	T	-0.0965109	1.68e-23	T	G	0.000370155	0.000169291	0.0287801	T	G	9.46797e-05	0.000232541	0.683897
MS	rs1112718	10	94479107	A	G	0.0825012	2.08e-17	G	A	-0.000281758	0.000166264	0.0901458	G	A	-0.000721856	0.000228315	0.00156893
MS	rs34026809	11	118480695	C	G	-0.0866478	7.68e-17	C	G	0.000437751	0.000414736	0.291202	C	G	-0.000840974	0.00056512	0.136717
MS	rs12365699	11	118743286	G	A	0.116894	2.1e-19	A	G	-0.000582575	0.000219838	0.00804935	A	G	-0.00035846	0.000302508	0.236034
MS	rs6589706	11	118747813	A	G	0.10436	4.53e-26	G	A	-0.000187632	0.000163493	0.251117	G	A	-0.000106603	0.000224931	0.635546
MS	rs6589939	11	122518525	A	G	-0.0790432	1.75e-12	G	A	0.000117208	0.000167865	0.485035	G	A	4.54279e-05	0.00023185	0.84466
MS	rs4262739	11	128421175	A	G	-0.065072	4.41e-12	A	G	4.66098e-05	0.000164668	0.777137	A	G	-0.000221397	0.000226641	0.32864
MS	rs61884005	11	14402930	C	G	0.0907544	6.34e-09	G	C	-0.000175151	0.000251427	0.486037	G	C	0.000276438	0.000345416	0.423534
MS	rs1365120	11	36438075	T	C	-0.0910194	4.06e-08	T	C	-0.000335243	0.000248272	0.17692	T	C	0.000457966	0.000345024	0.184396
MS	rs2269434	11	47360412	T	C	-0.0866478	1.47e-13	C	T	0.000177695	0.000171275	0.299513	C	T	0.000697378	0.000235703	0.00308959
MS	rs4939490	11	60793651	G	C	0.116894	2e-29	G	C	5.05086e-05	0.000167155	0.762526	G	C	0.000611777	0.000230024	0.00782349
MS	rs11231749	11	64095178	C	T	0.0657877	1.12e-11	C	T	0.000262659	0.000174809	0.132958	C	T	-0.000374031	0.000240151	0.119358
MS	rs531612	11	65705432	C	T	-0.0661398	1.21e-09	T	C	-0.000160273	0.000163188	0.326034	T	C	-9.49708e-05	0.000224571	0.67237
MS	rs4409785	11	95311422	T	C	-0.0833816	6.87e-12	C	T	0.000810721	0.000215974	0.00017424	C	T	-7.00932e-05	0.000298038	0.814068
MS	rs56095240	11	95421830	T	A	-0.103141	1.13e-09	A	T	-1.74762e-05	0.000243821	0.94286	A	T	0.000251595	0.00033617	0.454211
MS	rs3184504	12	111884608	T	C	0.0620354	4.24e-11	C	T	-0.000355929	0.000163517	0.0295038	C	T	0.000145265	0.000224294	0.517211
MS	rs7975763	12	123604053	C	T	-0.0822952	2.99e-13	T	C	0.000321963	0.000203036	0.1128	T	C	0.000462386	0.000279541	0.098111
MS	rs701006	12	58106836	G	A	0.116894	9.63e-31	G	A	4.58577e-05	0.000166001	0.782356	G	A	-4.89756e-05	0.000228791	0.830499
MS	rs1800693	12	6440009	T	C	-0.139262	2.24e-47	C	T	0.000306403	0.000166422	0.065605	C	T	9.71408e-05	0.000228734	0.671064
MS	rs2364485	12	6514963	C	A	-0.109815	1.51e-20	A	C	6.11689e-05	0.000223583	0.784404	A	C	4.8399e-05	0.000308717	0.875423
MS	rs61708525	12	94661453	G	A	0.0676586	1.8e-08	G	A	0.000168778	0.000178273	0.343772	G	A	0.000141807	0.000245237	0.563102
MS	rs9591325	13	50811220	T	C	0.205387	1.26e-19	C	T	-0.000563166	0.000327434	0.085446	C	T	-0.000280647	0.0004482	0.531208
MS	rs9568402	13	50961957	A	T	-0.0855579	4.8e-09	T	A	-0.000373573	0.000255506	0.143719	T	A	0.000303705	0.000351745	0.387905
MS	rs12588969	14	103230758	C	G	-0.0736465	1.82e-09	C	G	-0.000126671	0.000176342	0.472558	C	G	-0.0002954	0.000242373	0.222928
MS	rs12147246	14	103265844	G	A	-0.0899247	1.98e-15	G	A	-0.000135167	0.000170842	0.428839	G	A	-0.00012921	0.000235327	0.582961
MS	rs11852059	14	52306091	A	C	-0.0910194	1.19e-09	C	A	0.000375396	0.000215134	0.0809967	C	A	0.000330043	0.000294286	0.262074
MS	rs12434551	14	69253364	A	T	0.0788112	4.14e-17	T	A	-0.000756189	0.000163374	3.68488e-06	T	A	-0.000660983	0.000225221	0.00333772
MS	rs34695601	14	76014298	T	C	0.079735	5.56e-13	C	T	-0.000194133	0.000187903	0.301532	C	T	-0.000185748	0.000258944	0.473172
MS	rs62013236	15	79247482	C	T	0.10075	8.53e-17	T	C	-0.000156122	0.000237698	0.511303	T	C	-0.00053807	0.000325904	0.098738
MS	rs6496663	15	90887584	A	C	-0.0855579	1.13e-12	C	A	-4.28228e-05	0.000178435	0.810337	C	A	0.000425492	0.000245351	0.0828809
MS	rs405343	16	1067832	G	T	-0.0965109	3.05e-15	T	G	0.000289494	0.000218183	0.184564	T	G	0.000735451	0.00029975	0.0141463
MS	rs2286974	16	11114512	G	A	-0.0965109	4.09e-09	G	A	-0.000478386	0.000166363	0.00403368	G	A	-0.000553232	0.000228368	0.0154131
MS	rs34947566	16	11412926	C	A	0.136278	1.3e-23	A	C	0.000120703	0.000210537	0.566436	A	C	-0.000939493	0.000290001	0.00119708
MS	rs3809627	16	30103160	A	C	-0.0899247	1.23e-21	A	C	-0.00034564	0.000166678	0.0381089	A	C	-0.000118137	0.00022935	0.606488
MS	rs8062446	16	57077094	T	C	0.0843411	4.3e-09	T	C	4.59946e-05	0.000169384	0.785976	T	C	0.000245808	0.000232902	0.291237
MS	rs12925972	16	79111297	C	T	0.101654	1.11e-19	C	T	2.33022e-05	0.000165091	0.887754	C	T	0.000525578	0.000227313	0.0207713
MS	rs17724508	16	79350204	T	C	0.133656	6.07e-14	C	T	-0.000449716	0.000361105	0.212991	C	T	-0.000706572	0.000496235	0.154488
MS	rs6564681	16	79652720	T	C	-0.0779615	3.7e-14	T	C	-0.000427736	0.000179207	0.0169955	T	C	-0.000106739	0.00024626	0.664695
MS	rs35703946	16	86021505	G	A	0.123986	2.83e-17	A	G	-0.000310307	0.000239421	0.194953	A	G	-5.55663e-06	0.000329026	0.986526
MS	rs4796224	17	34842521	A	G	-0.0877389	1.13e-15	G	A	-7.09894e-05	0.000163954	0.665027	G	A	0.000223985	0.000225396	0.32035
MS	rs9909593	17	37970149	A	G	-0.0779615	8.57e-17	G	A	0.000145557	0.000163547	0.373468	G	A	0.000541727	0.000224461	0.0158029
MS	rs883871	17	38252660	G	A	-0.11991	8.56e-14	A	G	0.000447862	0.000250753	0.0740897	A	G	9.59031e-05	0.000345375	0.781259
MS	rs1026916	17	40529835	G	A	-0.107585	2.32e-28	G	A	-0.000447874	0.00017108	0.00884751	G	A	-0.000491335	0.000235174	0.0366876
MS	rs7222450	17	43407670	A	G	0.0601539	2.09e-10	A	G	-4.34159e-05	0.000163839	0.791016	A	G	-5.57824e-05	0.000225869	0.804934
MS	rs11079784	17	45702280	C	T	0.101654	1.99e-27	C	T	0.000182273	0.000163479	0.264866	C	T	0.000723895	0.000224528	0.00126404
MS	rs2150879	17	57859210	G	A	0.109751	4.05e-31	A	G	-0.000271247	0.000163998	0.0981364	A	G	-0.000782996	0.000225908	0.000528396
MS	rs9900529	17	73335776	C	G	0.0629748	4.76e-08	G	C	-0.00018041	0.000200037	0.367122	G	C	-2.66665e-05	0.000274926	0.92273
MS	rs4940730	18	56269737	A	G	0.0610951	3.9e-10	G	A	-9.90214e-05	0.000164358	0.546859	G	A	1.26508e-05	0.000225894	0.955339
MS	rs9955954	18	56348044	G	A	-0.0855579	4.85e-11	G	A	-9.53748e-05	0.000193043	0.621265	G	A	-0.000840347	0.000266571	0.00161942
MS	rs2469434	18	67544046	T	C	-0.0534008	2.92e-08	C	T	0.000193152	0.000166615	0.246347	C	T	2.18079e-05	0.000229162	0.924185
MS	rs34536443	19	10463118	G	C	0.185649	3.39e-11	C	G	-0.000639683	0.000402197	0.111731	C	G	-0.00193822	0.000548394	0.000408847
MS	rs28834106	19	10592144	T	C	0.110647	3.61e-19	C	T	-0.000261113	0.000183312	0.154326	C	T	-7.86432e-05	0.000251829	0.754822
MS	rs12609500	19	11173928	C	T	0.0563803	5.27e-09	T	C	-0.000339746	0.000187175	0.0695064	T	C	-0.00019912	0.000257967	0.440184
MS	rs58166386	19	16559421	G	A	0.102557	4.42e-24	G	A	0.000411513	0.000176766	0.0199131	G	A	0.000606511	0.000243008	0.0125664
MS	rs4808760	19	18301979	G	C	-0.113169	5.83e-25	G	C	-0.000176653	0.000180661	0.328168	G	C	-2.9591e-05	0.000248587	0.905246
MS	rs12971909	19	4466466	G	A	-0.0704225	5.56e-09	A	G	0.000213024	0.000177685	0.230573	A	G	-0.000186148	0.000244427	0.446319
MS	rs7260482	19	45143942	A	C	-0.0747235	1.43e-09	C	A	-0.00022976	0.000185137	0.214597	C	A	0.000219884	0.00025496	0.388455
MS	rs11083862	19	47638539	A	T	0.0741794	2.44e-09	T	A	-0.000210921	0.000164411	0.199534	T	A	0.000102529	0.000226364	0.650592
MS	rs1465697	19	49837246	C	T	-0.0932124	3.02e-18	T	C	0.000491734	0.00018973	0.00954951	T	C	0.000259735	0.000260755	0.319209
MS	rs1077667	19	6668972	C	T	0.1441	7.88e-33	T	C	7.79165e-05	0.000199838	0.696612	T	C	-0.000823002	0.000275871	0.00285203
MS	rs57116599	2	112770799	A	G	-0.0899247	1.11e-11	A	G	-0.000516439	0.000196044	0.00843199	A	G	-1.19866e-05	0.000270636	0.964673
MS	rs11899404	2	12607893	T	C	-0.0534008	1.66e-08	C	T	0.00012368	0.000165709	0.455444	C	T	-4.94241e-05	0.000227732	0.828187
MS	rs10191360	2	136884679	T	C	0.0806579	3.85e-10	C	T	0.000382575	0.000164763	0.0202355	C	T	1.39086e-05	0.00022685	0.951111
MS	rs962052	2	151644203	C	T	0.0610951	8.28e-09	T	C	0.000188913	0.000187233	0.312991	T	C	0.000107551	0.000259169	0.678154
MS	rs6738544	2	191989356	C	A	0.07139	2.4e-13	C	A	-1.67438e-05	0.000168965	0.921062	C	A	0.000322367	0.000232037	0.164747
MS	rs12614091	2	204632861	A	T	0.0732505	6.18e-12	T	A	-0.000360717	0.000199208	0.0701811	T	A	-0.000342948	0.000272972	0.208992
MS	rs35540610	2	231121829	C	T	0.132781	2.98e-33	C	T	-0.000235888	0.000193198	0.2221	C	T	0.000522557	0.000265913	0.0493994
MS	rs11125803	2	25052177	T	C	-0.0682788	5.45e-10	T	C	3.90581e-05	0.000186535	0.834146	T	C	-0.000517055	0.000257088	0.0443057
MS	rs12478539	2	43355324	G	C	0.110647	1.65e-24	C	G	-0.000177044	0.000182818	0.332838	C	G	-0.000246639	0.000252109	0.327925
MS	rs1177228	2	61242410	G	A	0.0907544	2.31e-19	G	A	0.000320631	0.000184067	0.0815239	G	A	0.000108751	0.000253448	0.667862
MS	rs13385171	2	65661843	C	T	0.0657877	3.47e-11	C	T	-1.81023e-05	0.0001654	0.912849	C	T	0.00013172	0.000227527	0.562644
MS	rs12622670	2	68646536	T	C	0.0861777	5.08e-16	T	C	-2.00073e-05	0.000163803	0.902787	T	C	-2.10755e-05	0.00022511	0.925409
MS	rs4812772	20	42579051	C	T	0.07139	6.17e-09	C	T	-1.50331e-05	0.000184488	0.935056	C	T	-0.000165765	0.000253366	0.51295
MS	rs6032662	20	44734310	C	T	0.0953102	5.28e-19	T	C	-0.000170366	0.000189834	0.369484	T	C	-0.000590559	0.000262075	0.0242355
MS	rs6020055	20	48422095	A	G	0.0573251	5.12e-08	G	A	-0.000173018	0.000419996	0.680376	G	A	6.00307e-05	0.000581365	0.917758
MS	rs2585447	20	52744437	T	C	-0.0844692	3.13e-10	C	T	3.56666e-05	0.000227435	0.875386	C	T	0.000422419	0.000313034	0.177199
MS	rs2248137	20	52789743	G	C	-0.0877389	1.92e-19	G	C	-0.000478443	0.000167773	0.00434881	G	C	-0.00047164	0.000230504	0.0407457
MS	rs6742	20	62374441	C	T	0.138892	4.11e-14	C	T	-2.2654e-05	0.000205098	0.912049	C	T	0.000575567	0.000282059	0.0412926
MS	rs2836438	21	39864727	G	A	-0.100926	2.62e-10	G	A	-0.000328982	0.000237595	0.166166	G	A	-2.26988e-05	0.000327982	0.944825
MS	rs9610458	22	22205353	T	C	0.0852598	1.16e-19	T	C	0.000195242	0.000164195	0.234407	T	C	0.000281696	0.000225816	0.212232
MS	rs760517	22	37258986	C	T	0.0676586	5.22e-11	T	C	-0.000277853	0.000183327	0.129618	T	C	-0.000476614	0.00025189	0.0584725
MS	rs5756405	22	37310954	A	G	0.0629748	5.35e-11	G	A	-0.000192926	0.000163897	0.23915	G	A	-5.06692e-05	0.000224773	0.82165
MS	rs137955	22	40291807	T	C	0.0554347	9.63e-09	C	T	-4.38525e-05	0.000165093	0.79053	C	T	0.000160312	0.00022678	0.479626
MS	rs140522	22	50971266	C	T	-0.109815	1.31e-21	C	T	-0.00045223	0.000173653	0.00920948	C	T	-0.000429005	0.00023919	0.0728827
MS	rs4325907	3	101749022	T	C	-0.0725707	1.99e-09	T	C	-0.000339493	0.000170577	0.0465634	T	C	-0.000379772	0.000234902	0.105939
MS	rs2289746	3	105455955	C	T	0.08158	4.59e-12	C	T	-0.000112274	0.000173519	0.517605	C	T	0.000463243	0.000238992	0.0525856
MS	rs9843355	3	119228508	G	A	0.142367	4.14e-30	A	G	-0.000148018	0.000207688	0.476037	A	G	-0.000356172	0.000286146	0.213235
MS	rs2331964	3	121542898	C	T	0.0907544	4.91e-20	C	T	0.000220278	0.000169494	0.193732	C	T	0.000360855	0.000233567	0.122355
MS	rs1014486	3	159691112	C	T	0.10436	3.13e-28	C	T	-1.55127e-05	0.00016537	0.925263	C	T	0.00055553	0.000227932	0.0148
MS	rs10936602	3	169536637	T	C	0.0741794	1.9e-11	C	T	-0.000264503	0.000189323	0.162384	C	T	-0.000157955	0.000259758	0.543132
MS	rs2590438	3	187565968	T	G	-0.0661398	4.65e-09	G	T	0.000397108	0.000169944	0.0194561	G	T	0.000525196	0.000234539	0.0251398
MS	rs13066789	3	187987624	C	T	0.064851	1.5e-08	T	C	5.982e-05	0.000164586	0.716263	T	C	-0.000112477	0.000226805	0.619952
MS	rs9863496	3	18798848	T	C	-0.0725707	2.75e-14	C	T	0.000227024	0.000182627	0.213833	C	T	3.43943e-05	0.000251701	0.89131
MS	rs13327021	3	27783015	C	T	-0.080126	1.55e-16	T	C	0.000279945	0.000170959	0.101528	T	C	0.000753998	0.000235413	0.00136087
MS	rs438613	3	28072086	C	T	0.139762	2.31e-49	C	T	0.00054684	0.000163144	0.000802831	C	T	0.000655574	0.000224743	0.00353468
MS	rs11919880	3	32962051	A	G	0.0582689	7.63e-10	G	A	-2.43481e-05	0.000165032	0.882709	G	A	-0.000167454	0.000227129	0.460961
MS	rs9878602	3	71535338	T	G	0.0953102	1.91e-18	G	T	-4.40733e-05	0.000163953	0.788071	G	T	-0.000373517	0.000224871	0.0967088
MS	rs6533052	4	103911781	A	G	0.0889262	7.03e-16	A	G	8.91326e-05	0.000163296	0.585181	A	G	0.000101244	0.000224787	0.652421
MS	rs2726479	4	106255589	T	C	-0.065072	3.84e-11	C	T	-0.000145507	0.00016573	0.379959	C	T	0.000285438	0.000227505	0.209608
MS	rs9992763	4	109058718	T	G	-0.0640053	2.36e-11	T	G	-0.000117287	0.000165101	0.477458	T	G	-0.000239219	0.000227163	0.292308
MS	rs17051321	4	122119449	C	T	-0.0812101	1.41e-10	T	C	0.000205396	0.00019045	0.280821	T	C	0.000470868	0.000263072	0.0734743
MS	rs72989863	4	164493807	G	A	0.0639133	5.55e-09	A	G	0.000274932	0.000169226	0.10424	A	G	-0.000328795	0.000232657	0.157594
MS	rs13136820	4	40307564	C	T	0.0751075	7.79e-10	T	C	-0.000415112	0.000175736	0.0181715	T	C	-0.000630391	0.000242394	0.00930441
MS	rs6837324	4	48127262	A	G	-0.0640053	1.34e-11	G	A	4.16975e-05	0.000166564	0.802326	G	A	0.000410506	0.000229239	0.0733375
MS	rs2705616	4	87862396	G	C	-0.0747235	1.15e-11	G	C	0.000159531	0.000163875	0.330311	G	C	-0.000104912	0.000225083	0.641143
MS	rs32658	5	118703662	G	T	-0.0608121	3.24e-08	T	G	0.000221869	0.000165707	0.1806	T	G	0.000183852	0.000227812	0.419648
MS	rs244656	5	133449827	A	T	0.10616	2.96e-14	A	T	0.000111201	0.000244654	0.649453	A	T	0.00086668	0.000337773	0.0102925
MS	rs2084007	5	133891282	C	T	0.0806579	1.91e-13	T	C	-0.000297035	0.000163242	0.0688221	T	C	-0.0002972	0.000224911	0.186365
MS	rs249677	5	141539339	C	A	-0.071496	5.73e-13	A	C	0.000198817	0.000169735	0.241464	A	C	-0.000108447	0.000233384	0.642166
MS	rs2546890	5	158759900	A	G	0.0843411	5.3e-19	G	A	-0.000397622	0.00016315	0.0148042	G	A	-0.000280038	0.00022435	0.211953
MS	rs67111717	5	176790162	G	A	0.0989399	3.18e-21	G	A	-3.15874e-05	0.000173791	0.855775	G	A	0.000264626	0.000238311	0.266818
MS	rs10063294	5	35877505	A	G	-0.11991	1.58e-28	A	G	3.74124e-05	0.000163712	0.819237	A	G	-0.000177303	0.000225169	0.431036
MS	rs11749040	5	40396425	G	A	-0.139262	4.54e-25	A	G	0.000243056	0.000242366	0.315936	A	G	0.000675037	0.000333379	0.0428856
MS	rs7731626	5	55444683	G	A	0.0898407	3.89e-15	A	G	-1.47334e-05	0.000168533	0.930337	A	G	-0.00053648	0.000231673	0.0205767
MS	rs34681760	5	6712834	C	T	0.0788112	2.01e-11	C	T	0.000202885	0.000174589	0.245206	C	T	0.000825355	0.000240932	0.000613393
MS	rs802730	6	128280104	T	C	0.0629748	1.08e-09	C	T	-0.000305438	0.000176221	0.0830502	C	T	-8.59443e-05	0.000242049	0.722538
MS	rs2327586	6	135495226	T	C	0.0998453	9.48e-20	T	C	-4.50186e-06	0.000189913	0.981088	T	C	0.000592886	0.000261594	0.0234258
MS	rs4896153	6	135833463	A	T	-0.108699	2.72e-29	A	T	-0.000230045	0.000169213	0.17399	A	T	-0.000870649	0.000232844	0.000184664
MS	rs62420820	6	137438057	A	G	0.134531	9.26e-36	A	G	0.000139323	0.000191111	0.465994	A	G	0.000448738	0.000264221	0.0894449
MS	rs631204	6	137959455	A	C	0.107059	4.92e-25	A	C	0.000235344	0.000165914	0.156055	A	C	0.000462003	0.000227895	0.0426369
MS	rs17780048	6	138179146	C	T	0.0962189	5.15e-12	T	C	-0.000136542	0.000338677	0.686829	T	C	0.000263473	0.000465914	0.571737
MS	rs6911131	6	143865221	A	G	-0.114289	1.31e-10	G	A	-0.000177686	0.000366865	0.628148	G	A	0.000410922	0.000502867	0.413839
MS	rs1738074	6	159465977	T	C	-0.12443	3.48e-35	C	T	0.000299849	0.000164325	0.0680432	C	T	0.000250297	0.000226253	0.268611
MS	rs719316	6	16672760	T	C	0.0695261	1.62e-13	T	C	0.000210318	0.000164799	0.201882	T	C	0.00030734	0.000226517	0.174844
MS	rs1076928	6	36348689	C	T	-0.122168	2.75e-19	C	T	-0.000156068	0.000164315	0.342209	C	T	-0.000348278	0.000225734	0.122864
MS	rs12211604	6	7100029	A	G	-0.0629398	2.15e-08	A	G	0.00016788	0.000170622	0.32515	A	G	-0.000193879	0.000234482	0.408328
MS	rs72928038	6	90976768	G	A	-0.14387	8.38e-29	A	G	0.000219031	0.000212406	0.302454	A	G	4.0474e-06	0.00029159	0.988925
MS	rs73414214	7	105706462	C	A	0.120446	6.34e-10	A	C	-0.000202275	0.000290508	0.486254	A	C	-0.000277134	0.000397919	0.486142
MS	rs4728142	7	128573967	G	A	-0.0565704	3.37e-09	A	G	0.000194627	0.00016413	0.235701	A	G	0.000583729	0.000226236	0.00987581
MS	rs10271373	7	138729795	C	A	-0.0555127	3.11e-09	C	A	-1.86839e-05	0.000163747	0.909156	C	A	-0.000678554	0.00022418	0.0024717
MS	rs354033	7	149289464	G	A	0.0778865	7.99e-10	A	G	-0.000132037	0.000187374	0.481018	A	G	-0.000707102	0.000257312	0.00599591
MS	rs55858457	7	2443302	G	T	-0.0640053	2.95e-08	G	T	2.17412e-05	0.000175907	0.901636	G	T	-1.98449e-05	0.000242258	0.934713
MS	rs10951154	7	27135314	T	C	-0.076881	3.05e-10	T	C	-2.95349e-05	0.000244896	0.904007	T	C	-0.000221797	0.000338772	0.512657
MS	rs10245867	7	28142186	G	T	-0.0672087	1.22e-11	T	G	-6.45226e-05	0.000174046	0.710846	T	G	2.34561e-07	0.000239692	0.999219
MS	rs10951042	7	3139417	C	T	0.0971267	1.5e-18	C	T	0.000491388	0.00016497	0.00289567	C	T	0.000236319	0.000227119	0.298105
MS	rs60600003	7	37382465	T	G	-0.13582	4.6e-19	G	T	0.000541539	0.000271056	0.0457305	G	T	8.34539e-05	0.000375535	0.824138
MS	rs10230723	7	50239880	A	T	0.0843411	7.69e-11	T	A	-4.38503e-05	0.00023177	0.849938	T	A	-0.000872432	0.00031938	0.00630254
MS	rs735542	8	128175696	A	G	0.0704585	5.66e-13	A	G	0.000324354	0.000174683	0.0633391	A	G	0.000263318	0.000240054	0.272681
MS	rs6990534	8	128814091	A	G	-0.0976128	5.85e-20	G	A	-4.25994e-06	0.000179179	0.981032	G	A	0.000730021	0.000247064	0.00312922
MS	rs3923387	8	144986793	T	C	0.0620354	1.76e-08	T	C	0.00039816	0.000165567	0.0161812	T	C	0.000245263	0.000227546	0.281097
MS	rs28703878	8	79417222	A	G	-0.102033	5.27e-22	G	A	0.000107403	0.00018601	0.563669	G	A	1.65553e-06	0.000255933	0.994839
MS	rs7855251	9	100868189	T	C	0.0741794	1.23e-10	C	T	-0.000161126	0.000189112	0.394208	C	T	-0.000440601	0.000261469	0.0919706

## Sheet: Table S7
Table S7. SNPs used to construct polygenic risk score (PRS) of rheumatoid arthritis (RA)
Disease	SNP	chr	pos	Both sex				Male					Female
				alt	ref	beta	pval	alt	ref	beta	se	pval	alt	ref	beta	se	pval
RA	rs7552539	1	113267461	G	NA	0.103459	1.8e-12	G	A	0.000277772	0.000468978	0.553656	G	A	0.000569663	0.00059745	0.340343
RA	rs736202	1	113276758	T	NA	0.0998453	6.3e-10	T	C	0.000318539	0.000565815	0.573454	T	C	0.00184277	0.000717493	0.0102193
RA	rs773566	1	113278962	C	NA	0.0544882	1.1e-08	C	T	0.000766615	0.000309857	0.0133584	C	T	0.000412807	0.000393751	0.294457
RA	rs12086096	1	113314231	A	NA	0.0880109	3.5e-15	A	G	0.000808224	0.000363466	0.026173	A	G	0.0011434	0.000461525	0.0132336
RA	rs181871363	1	113318163	C	NA	0.290428	9.5e-13	C	T	-0.000892378	0.00259826	0.731259	C	T	0.00186061	0.00331979	0.575166
RA	rs12126425	1	113371768	G	NA	0.126633	1.3e-20	G	A	0.000308102	0.000467018	0.509433	G	A	0.0008019	0.000593413	0.176589
RA	rs4839324	1	113528995	A	NA	0.0825012	3.1e-11	A	G	-3.92433e-05	0.000431231	0.92749	A	G	0.000601131	0.000548638	0.273221
RA	rs115985944	1	113611678	C	NA	0.234281	1.2e-09	C	T	0.00157822	0.00142791	0.269046	C	T	0.0050079	0.00180731	0.0055905
RA	rs6704054	1	113674209	C	NA	-0.0736465	5e-15	C	T	-0.000335761	0.000302796	0.267489	C	T	1.08202e-05	0.000383132	0.97747
RA	rs6679677	1	113761186	A	NA	0.345007	3.5e-144	A	C	0.00207773	0.000491419	2.35874e-05	A	C	0.00368373	0.000627009	4.2333e-09
RA	rs1746853	1	113840475	C	NA	-0.0965109	2.3e-25	C	A	5.76427e-05	0.000301594	0.848426	C	A	-0.000974979	0.000382653	0.0108367
RA	rs3789614	1	113980843	G	NA	-0.0672087	3.4e-11	G	A	-0.000314632	0.000315732	0.319002	G	A	-0.000199431	0.00039943	0.617576
RA	rs12029644	1	113994158	T	NA	0.135405	6.3e-21	T	C	0.000328305	0.000487579	0.500733	T	C	0.000188088	0.000615363	0.759869
RA	rs138244061	1	114067502	C	NA	0.24686	1.9e-11	C	T	0.0016671	0.00160423	0.298718	C	T	0.00328523	0.00201356	0.102776
RA	rs72690067	1	114098144	T	NA	0.208639	2.3e-08	T	G	0.000163367	0.00146414	0.911157	T	G	0.00222701	0.00186979	0.233638
RA	rs4073285	1	2608357	T	NA	-0.065072	8.7e-11	T	C	-0.000505048	0.000317607	0.111799	T	C	-6.87292e-05	0.000401888	0.864211
RA	rs36084352	1	37898724	C	NA	-0.0512933	2.9e-08	C	T	-0.000265485	0.000301747	0.378954	C	T	0.000265081	0.000382678	0.488498
RA	rs1538981	10	31122426	C	NA	-0.0629398	9.4e-12	T	C	0.000337287	0.00029984	0.260636	T	C	0.00039916	0.000381591	0.295543
RA	rs3118470	10	6059750	C	NA	0.0685928	6.6e-13	C	T	0.000719384	0.000320551	0.0248203	C	T	0.000521055	0.000407942	0.201506
RA	rs4948498	10	62062625	A	NA	0.0573251	1.8e-09	A	G	0.000580293	0.000314239	0.0647982	A	G	0.000868219	0.000398121	0.0292002
RA	rs7117261	11	118870448	T	NA	-0.0844692	7.6e-13	C	T	0.00112482	0.000379707	0.00305368	C	T	0.000246936	0.000481785	0.608271
RA	rs73013527	11	128627057	C	NA	0.0573251	7.7e-10	T	C	-0.000363588	0.000302991	0.230143	T	C	-0.000593425	0.000384866	0.1231
RA	rs479777	11	64340005	C	NA	-0.0618754	1.4e-10	C	T	-0.000722168	0.000316532	0.0225203	C	T	-0.000219491	0.000400551	0.583711
RA	rs7137828	12	111494996	C	NA	0.079735	8e-18	T	C	-0.000268092	0.00030026	0.371931	T	C	-0.000788222	0.000379723	0.0379157
RA	rs76428106	13	28029870	C	NA	0.207827	1.7e-08	C	T	0.00280191	0.00136088	0.0395056	C	T	0.00494386	0.001746	0.00463299
RA	rs7320598	13	39771329	T	NA	-0.0747235	1.6e-14	T	C	-0.000132251	0.000313421	0.673056	T	C	-8.18269e-05	0.000398779	0.837421
RA	rs9323612	14	75502265	G	NA	0.0544882	2.2e-08	G	A	0.000115101	0.000318151	0.717517	G	A	3.64823e-05	0.000403751	0.928002
RA	rs117068593	14	92651884	T	NA	-0.0758017	1.9e-09	T	C	-0.000617228	0.000383695	0.107697	T	C	0.000297541	0.000485239	0.539756
RA	rs8032939	15	38541832	C	NA	0.0676586	7.6e-09	C	T	0.00118081	0.000346863	0.000663612	C	T	0.0005972	0.00044208	0.176733
RA	rs112779700	15	69732152	AC	NA	-0.114289	1e-10	AC	A	-0.000112426	0.000502216	0.822867	AC	A	-0.00151268	0.000634043	0.0170447
RA	rs2117234	15	69746861	T	NA	0.0732505	2.7e-15	T	C	5.39083e-05	0.000300169	0.857472	T	C	0.000738942	0.000380609	0.0522026
RA	rs12919058	16	28916497	C	NA	0.0573251	2.1e-09	A	C	-0.000498317	0.000317151	0.116131	A	C	-0.000439894	0.000402292	0.27419
RA	rs13333054	16	85977427	T	NA	0.07139	1.1e-10	T	C	-0.000113404	0.000356668	0.750521	T	C	0.00152406	0.000452307	0.000753148
RA	rs144778381	19	10188385	G	NA	-0.167236	2.3e-09	G	C	-0.00110397	0.000954007	0.247194	G	C	-0.00260158	0.00120052	0.0302323
RA	rs34536443	19	10352442	C	NA	-0.28369	2.5e-29	C	G	-0.00239547	0.000737567	0.00116326	C	G	-0.00348431	0.000927358	0.000171845
RA	rs11085727	19	10355447	T	NA	-0.0899247	4.3e-18	T	C	-0.000691129	0.000329439	0.0359157	T	C	-0.00111838	0.000417743	0.0074248
RA	rs140752376	19	10583892	A	NA	-0.162519	2.9e-10	A	G	-0.00168437	0.000837471	0.0442998	A	G	-0.00123651	0.00104769	0.237911
RA	rs72836344	2	111117122	T	NA	0.0843411	6e-09	T	G	0.00108227	0.000499302	0.0301936	T	G	0.00126646	0.000634594	0.0459677
RA	rs4853458	2	191094763	A	NA	0.0980337	2.7e-19	G	A	-0.000554548	0.00036002	0.123483	G	A	-0.00204355	0.000455225	7.15673e-06
RA	rs2540442	2	201475352	A	NA	0.10436	2e-09	T	A	-0.00073319	0.000547069	0.180177	T	A	-0.00061241	0.000692838	0.376743
RA	rs3087243	2	203874196	A	NA	-0.0844692	3e-19	A	G	9.86066e-05	0.000300931	0.74316	A	G	-0.000825529	0.000381959	0.030673
RA	rs9979383	21	35343463	C	NA	-0.0534008	1.7e-08	T	C	0.000756605	0.00031047	0.014812	T	C	0.000450951	0.000393228	0.251468
RA	rs9610607	22	36919717	T	NA	-0.0544562	6e-09	C	T	0.000386242	0.000300682	0.198951	C	T	0.00084555	0.000380074	0.0261028
RA	rs5757614	22	39321549	T	NA	0.0620354	9e-09	T	G	0.000365424	0.000367385	0.319902	T	G	0.000545615	0.000466728	0.242396
RA	rs75719572	3	46141688	G	NA	-0.0747235	3.5e-08	G	C	-0.000728632	0.00043446	0.0935253	G	C	-0.00142091	0.000552428	0.0101087
RA	rs35677470	3	58197909	A	NA	0.0971267	1.8e-08	A	G	-0.000271882	0.00054531	0.618074	A	G	0.0016021	0.000691838	0.0205751
RA	rs4696282	4	151658333	A	NA	0.0620354	2.5e-08	A	G	0.000778615	0.000373675	0.0371921	A	G	0.000912879	0.000474623	0.0544341
RA	rs932036	4	26089240	T	NA	0.0870947	6.6e-18	T	A	0.000324306	0.000325537	0.319146	T	A	0.000860741	0.000412026	0.0367052
RA	rs2431697	5	160452971	C	NA	-0.0544562	6.8e-09	C	T	0.000114858	0.000301603	0.703334	C	T	-0.000563854	0.000383695	0.141689
RA	rs7731626	5	56148856	A	NA	-0.130109	1.1e-39	A	G	-0.00112474	0.000309059	0.000273507	A	G	-0.00189812	0.000391752	1.26576e-06
RA	rs182572	5	56156678	T	NA	-0.0822952	1.3e-13	C	T	0.000463876	0.000343865	0.177336	C	T	0.00139079	0.000435863	0.00141861
RA	rs9372120	6	106219660	G	NA	0.0629748	1.2e-08	G	T	0.000752958	0.000368231	0.0408765	G	T	-1.17056e-05	0.000467163	0.98001
RA	rs17264332	6	137684378	G	NA	0.0852598	2.7e-14	G	A	0.00013461	0.000361087	0.709304	G	A	0.00147175	0.000456986	0.00127965
RA	rs9494894	6	137907383	C	NA	0.173953	3.6e-11	C	T	0.000524323	0.000850496	0.537571	C	T	0.00307625	0.00106905	0.00400801
RA	rs3093017	6	167127770	C	NA	0.0723207	7e-15	G	C	-0.000894499	0.00030307	0.00316322	G	C	-0.00151036	0.000384068	8.40902e-05
RA	rs17600910	6	26251044	G	NA	0.124869	8.7e-09	G	A	0.00257252	0.000795709	0.00122524	G	A	0.00292743	0.00101943	0.00408391
RA	rs142999768	6	26625763	T	NA	0.231112	7.1e-10	T	C	-0.00134356	0.00179343	0.453765	T	C	-0.00378807	0.00228428	0.0972551
RA	rs556575539	6	26686031	T	NA	0.287432	1.6e-20	T	C	0.00378039	0.00137731	0.00605591	T	C	0.00594289	0.00177469	0.000812091
RA	rs6908155	6	27529369	TAT	NA	-0.115411	2.5e-10	T	A	0.000346301	0.000366291	0.344443	T	A	0.000432186	0.000464635	0.352288
RA	rs62401437	6	28180077	A	NA	0.0610951	1.5e-09	A	G	0.00111795	0.000344151	0.0011606	A	G	-0.000112905	0.000436372	0.79584
RA	rs28505234	6	28382995	G	NA	-0.11205	2.6e-13	G	A	-0.000817178	0.000411883	0.0472569	G	A	-0.000954815	0.000522444	0.0676122
RA	rs9257460	6	29007013	A	NA	0.10616	6.5e-11	A	G	0.000801193	0.000629204	0.202898	A	G	0.00162675	0.000800771	0.0422072
RA	rs9257660	6	29272502	T	NA	-0.0888312	2.4e-10	C	T	0.000552239	0.000423335	0.192066	C	T	0.00121125	0.000534741	0.0235065
RA	rs17404424	6	29307521	A	NA	0.178983	2e-14	A	G	0.00164697	0.000736074	0.025255	A	G	0.000538479	0.000936726	0.565392
RA	rs3094570	6	29515423	A	NA	0.0971267	1.3e-09	A	G	0.000104611	0.000314203	0.739179	A	G	0.000940171	0.000397551	0.0180357
RA	rs184991694	6	29652796	CTCCGTCTCAAAAAAAAAAAAAAAAAAAGAAAAGAAAAAAAC	NA	0.122218	2e-20	T	C	0.00047776	0.00076236	0.530867	T	C	0.00124201	0.000964952	0.198052
RA	rs9257971	6	29682701	TT	NA	0.0898407	9.4e-18	A	T	-0.000226626	0.000362189	0.531505	A	T	-0.000498754	0.0004592	0.277419
RA	rs1611144	6	29831577	G	NA	-0.0672087	9.6e-13	G	A	-0.000325835	0.000300597	0.278384	G	A	-0.00070296	0.000380434	0.0646355
RA	rs573674617	6	29933532	T	0.752	-0.382726	1.2e-08	T	C	-0.00327903	0.00144166	0.0229386	T	C	-0.00154079	0.00181777	0.396649
RA	rs2975007	6	29934550	T	NA	0.116894	5.5e-30	T	G	0.000982949	0.0003153	0.00182419	T	G	0.0015191	0.000398998	0.000140539
RA	rs9260191	6	29944621	G	NA	0.124869	5.2e-25	T	A	-0.000805041	0.000681473	0.237475	T	A	-0.00143079	0.000866132	0.0985502
RA	rs200774808	6	29976324	C	NA	-0.0943107	1.7e-14	CTAA	C	0.000115734	0.000403756	0.774386	CTAA	C	0.00114042	0.000510872	0.0255966
RA	rs2523979	6	30115738	A	NA	0.0953102	1.2e-13	A	T	0.000499807	0.000404896	0.217052	A	T	0.00215026	0.000515183	2.9972e-05
RA	rs1264691	6	30226097	T	NA	-0.177931	7.1e-13	T	C	-0.00137396	0.000615939	0.025704	T	C	-0.0015331	0.000781511	0.0497966
RA	rs9261625	6	30254820	A	NA	-0.121038	3e-20	A	G	-0.00102741	0.000398578	0.00994757	A	G	-0.00142517	0.000506372	0.00488638
RA	rs3130396	6	30255713	C	NA	0.123102	6.9e-39	C	T	0.00106387	0.000301678	0.000421192	C	T	0.00169414	0.00038339	9.92862e-06
RA	rs1264569	6	30397543	C	NA	-0.0965109	5.6e-16	T	C	0.00116271	0.000379172	0.0021665	T	C	0.00163256	0.00047988	0.000669044
RA	rs78235773	6	30439961	CATTCTCTCTCTCTCTCTATCTCTCTCTCTCTCTCTCTCTCTCTCTCTCTCTCTCTCTCC	NA	0.256965	1.9e-31	T	C	0.00119697	0.0011131	0.282219	T	C	0.0024419	0.00139944	0.0810007
RA	rs4711222	6	30565498	T	NA	-0.117658	3.1e-24	T	C	-0.0005167	0.000355122	0.145672	T	C	-0.00125177	0.000452278	0.00564579
RA	rs28360604	6	30675990	G	NA	0.0778865	8.6e-12	G	C	-0.000124402	0.000393903	0.752141	G	C	0.000705826	0.000499015	0.157235
RA	rs111455094	6	30733807	C	NA	0.210261	1.5e-10	C	T	0.00158826	0.0010573	0.133049	C	T	0.00380501	0.00135568	0.00500523
RA	rs190300559	6	30751005	G	NA	-0.176737	4.7e-09	G	A	-0.000510826	0.000904866	0.572393	G	A	-0.00144096	0.00115129	0.210716
RA	rs10947096	6	30798118	A	NA	0.0907544	2.8e-15	A	G	0.000999042	0.000421142	0.0176825	A	G	0.00178624	0.00053245	0.000794522
RA	rs78868683	6	30830500	C	NA	-0.157824	6e-09	C	G	-0.000477283	0.000784495	0.542926	C	G	-0.000630714	0.000998323	0.527536
RA	rs3094110	6	30831266	C	NA	-0.0921153	6e-22	T	C	0.000814468	0.00030732	0.00804439	T	C	0.00194978	0.00039003	5.76646e-07
RA	rs11753326	6	30958208	C	NA	-0.105361	8.6e-10	C	T	0.000528644	0.000554096	0.340052	C	T	-0.00153616	0.000702271	0.0287131
RA	rs116025100	6	30967513	A	NA	-0.149661	1e-08	A	G	-0.000448613	0.000771655	0.560996	A	G	-0.00381745	0.000974852	9.00868e-05
RA	rs34411153	6	30993808	T	NA	0.244514	2.2e-58	T	C	0.0021855	0.000597438	0.000254148	T	C	0.00565425	0.000757434	8.36451e-14
RA	rs7739491	6	31011426	C	NA	-0.0954102	3.1e-21	C	A	-0.00128547	0.00032153	6.39116e-05	C	A	-0.00159232	0.000407452	9.30999e-05
RA	rs9986628	6	31020774	GAGTTCCGGGTAGGCGTGGGCTTGGCGG	NA	0.112435	4.9e-12	G	C	0.000411978	0.000358655	0.250691	G	C	0.000402633	0.000453306	0.374426
RA	rs9501039	6	31026031	C	NA	-0.262664	7.4e-11	C	T	-0.0017907	0.00100806	0.0756716	C	T	-0.000869402	0.00128614	0.499056
RA	rs4713424	6	31034965	A	NA	-0.11991	3.3e-08	A	G	-0.00177261	0.000652229	0.00657296	A	G	-0.000722122	0.00083156	0.38518
RA	rs143277513	6	31067497	A	NA	-0.132389	9.1e-21	A	G	-0.000762164	0.000447052	0.0882214	A	G	-0.00232203	0.000566856	4.19932e-05
RA	rs3130553	6	31114508	G	NA	0.0516432	4.1e-08	G	A	0.000579317	0.000299971	0.0534551	G	A	0.000375625	0.000379295	0.322018
RA	rs3132558	6	31137689	C	NA	-0.058689	4.9e-08	G	C	-9.25711e-05	0.000346673	0.789449	G	C	0.00157205	0.000440121	0.000354556
RA	rs149792111	6	31144358	A	NA	0.20945	2.8e-10	A	C	0.00278887	0.00125148	0.0258515	A	C	0.00318847	0.00158941	0.0448494
RA	rs3734869	6	31175862	A	NA	0.0676586	1.5e-08	A	G	0.00102234	0.000421405	0.015266	A	G	0.000268809	0.000535083	0.615409
RA	rs28362363	6	31202342	C	NA	0.114221	2e-15	C	G	0.00137469	0.000426686	0.00127423	C	G	0.000302619	0.000541499	0.576262
RA	rs3887152	6	31208558	T	NA	0.0980337	6e-25	T	C	0.00105461	0.00030907	0.000644589	T	C	0.000906853	0.000391558	0.0205586
RA	rs117292830	6	31250491	A	NA	0.354873	5.3e-44	A	G	0.00444891	0.000925594	1.53697e-06	A	G	0.00204672	0.00118159	0.0832451
RA	rs1071649	6	31271337	T	NA	0.142367	2.2e-24	A	G	-0.000405425	0.00113842	0.721743	A	G	-0.000942232	0.00143109	0.51028
RA	rs2524084	6	31273862	G	NA	0.166362	1.6e-68	G	A	0.00139129	0.000311416	7.91391e-06	G	A	0.00329862	0.000396195	8.43314e-17
RA	rs2853915	6	31307512	C	NA	0.152721	8.7e-58	C	A	0.000484025	0.000315045	0.12445	C	A	0.0025756	0.00039955	1.14912e-10
RA	rs34504162	6	31342849	G	NA	0.138021	5.1e-38	G	A	0.000758484	0.000350268	0.0303556	G	A	0.00161537	0.000444542	0.000279364
RA	rs9265918	6	31346266	T	NA	0.224742	7.4e-35	C	T	4.43942e-05	0.000407534	0.913255	C	T	-0.00114918	0.000517807	0.0264654
RA	rs9468976	6	31352696	G	NA	-0.141564	1.1e-28	G	C	-0.00143324	0.00038303	0.000182727	G	C	-0.00179954	0.00048435	0.000202957
RA	rs9266184	6	31356887	G	NA	0.0695261	9.7e-11	G	T	0.0002486	0.000329788	0.45096	G	T	0.000866514	0.000418468	0.0383899
RA	rs9266198	6	31357070	GCCGAC	NA	0.195567	2.7e-45	G	C	0.000931564	0.000329807	0.00473497	G	C	0.00232672	0.000418548	2.71621e-08
RA	rs9468982	6	31363433	T	NA	0.192272	2.9e-21	G	T	-0.000818983	0.000485982	0.0919494	G	T	-0.00166526	0.000613611	0.00665082
RA	rs118143045	6	31396103	G	NA	-0.130109	4.6e-08	G	A	-0.00215328	0.000867338	0.0130428	G	A	-0.000636567	0.0010987	0.562331
RA	rs28559870	6	31410197	T	NA	0.195567	2.2e-70	T	C	0.00174624	0.000401121	1.34123e-05	T	C	0.00209789	0.000508036	3.63849e-05
RA	rs201023435	6	31422588	TAC	NA	0.410121	3.2e-44	TAC	T	0.0039425	0.000715931	3.65906e-08	TAC	T	0.00461076	0.000910718	4.13577e-07
RA	rs2844512	6	31441789	C	NA	-0.13582	1.2e-44	G	C	0.00107062	0.000306648	0.000480676	G	C	0.0018925	0.000388453	1.1063e-06
RA	rs4360170	6	31462582	G	NA	-0.191161	1.9e-16	G	A	-0.00125589	0.000693845	0.0702904	G	A	-0.00166246	0.000885893	0.060575
RA	rs2523675	6	31468255	A	NA	-0.151986	1.2e-50	A	G	-0.0013165	0.000319679	3.82043e-05	A	G	-0.00146062	0.000404812	0.000308471
RA	rs4713467	6	31469498	T	NA	-0.238257	2e-14	T	C	-0.000166684	0.00113204	0.882941	T	C	0.00120171	0.00142774	0.399966
RA	rs2596534	6	31477568	C	NA	0.10616	9e-30	C	T	0.000601624	0.000304735	0.0483543	C	T	0.00162126	0.000386718	2.7619e-05
RA	rs3749946	6	31481085	A	NA	-0.24718	5.9e-37	A	C	-0.00127099	0.000654573	0.0521748	A	C	-0.00220296	0.000824606	0.00755121
RA	rs116671810	6	31482497	A	0.525	0.356975	3.4e-09	A	G	0.0039142	0.00182538	0.0320092	A	G	0.00448782	0.00226717	0.0477631
RA	rs9267325	6	31493715	C	NA	0.259283	6.3e-92	C	G	0.00245818	0.000423836	6.65004e-09	C	G	0.00346251	0.000538187	1.2486e-10
RA	rs6922431	6	31497253	C	NA	-0.226901	7.3e-30	C	T	-0.000985474	0.000715286	0.168287	C	T	-0.00278046	0.000896351	0.00192258
RA	rs4713471	6	31505046	G	NA	-0.187535	5.1e-44	G	A	-0.000602901	0.000440914	0.171505	G	A	-0.00193668	0.000559739	0.000540364
RA	rs34492353	6	31552881	A	NA	0.344299	5.6e-91	A	T	0.00259307	0.000711071	0.000265701	A	T	0.00531866	0.000899436	3.35823e-09
RA	rs2857604	6	31557328	G	NA	-0.0822952	1e-09	G	T	-0.000836031	0.000397196	0.0353077	G	T	-0.00111032	0.000501562	0.0268492
RA	rs2230365	6	31557671	T	NA	0.0907544	4.5e-13	T	C	0.000267704	0.00043027	0.533826	T	C	0.000930015	0.00054629	0.0886784
RA	rs9267515	6	31602089	A	NA	-0.0758017	2.7e-13	A	G	-0.000815775	0.000330179	0.0134859	A	G	-0.000720203	0.000418626	0.085362
RA	rs2736182	6	31615535	A	NA	-0.281038	4.3e-12	A	G	-0.0017736	0.00111853	0.112819	A	G	-0.00232522	0.00142153	0.1019
RA	rs34137317	6	31637117	T	NA	-0.248461	8.3e-12	T	C	-0.00221684	0.00111713	0.047212	T	C	-0.00411305	0.00140722	0.00346922
RA	rs148844907	6	31660620	A	NA	-0.307885	1.1e-09	A	T	-0.00129578	0.00132597	0.328454	A	T	-0.00137036	0.00167774	0.41405
RA	rs14365	6	31667933	C	NA	0.0825012	1.7e-12	C	T	0.00131222	0.000391502	0.000803203	C	T	0.00115557	0.000496593	0.019967
RA	rs3115667	6	31675622	T	NA	-0.235722	6e-100	C	T	0.00166569	0.000332271	5.3627e-07	C	T	0.00352055	0.000421582	6.82362e-17
RA	rs909267	6	31778771	C	NA	-0.213193	7.6e-27	C	T	-0.000493139	0.000606024	0.415802	C	T	-0.00297156	0.000770703	0.000115462
RA	rs115333512	6	31812462	T	NA	0.316998	2e-74	T	C	0.00154732	0.000808267	0.0555755	T	C	0.00457782	0.00102335	7.70451e-06
RA	rs495699	6	31852692	A	NA	-0.303811	2.1e-19	A	C	-0.00200544	0.000810498	0.0133496	A	C	-0.00282751	0.00102382	0.00575014
RA	rs2507954	6	31858637	G	NA	0.293416	2e-172	G	A	0.00148685	0.000319278	3.21227e-06	G	A	0.0033408	0.000403652	1.27719e-16
RA	rs41285751	6	31932038	T	NA	-0.368169	1.7e-61	T	G	-0.00205041	0.000792091	0.00963758	T	G	-0.00263262	0.00100425	0.00875575
RA	rs145438456	6	31935462	TTTA	NA	-0.41098	1.9e-43	A	T	-0.00355642	0.00200576	0.0762136	A	T	-0.00221068	0.0025497	0.385924
RA	rs28361039	6	32010969	G	NA	-0.0965109	4.5e-19	A	G	-0.000151058	0.000331137	0.648262	A	G	0.000510446	0.000419658	0.223858
RA	rs1004095	6	32185632	C	NA	0.33146	1e-200	C	A	0.00243247	0.000325145	7.40096e-14	C	A	0.00468066	0.000411311	5.38474e-30
RA	rs116519179	6	32191965	A	NA	-0.218156	1.6e-09	A	G	-0.00122339	0.00128382	0.340629	A	G	-0.00614211	0.00164683	0.000191799
RA	rs16869834	6	32211932	G	NA	-0.199671	1.6e-22	G	A	-0.000695798	0.000731525	0.341524	G	A	-0.00186191	0.000918347	0.0426167
RA	rs8192585	6	32221046	A	NA	0.214305	6e-25	A	G	0.00243122	0.000717437	0.000702255	A	G	0.00267607	0.000915722	0.0034743
RA	rs915894	6	32222613	G	NA	0.109751	8.1e-30	G	T	0.000413565	0.000305956	0.176468	G	T	0.00184474	0.000388204	2.01577e-06
RA	rs8192569	6	32222707	A	NA	-0.116534	4.8e-11	A	G	-0.000231207	0.000558587	0.678938	A	G	-0.00192656	0.000708398	0.00653676
RA	rs499606	6	32226531	T	NA	-0.287682	3.9e-52	T	C	-0.00114007	0.000622152	0.0668854	T	C	-0.00158148	0.000779683	0.0425246
RA	rs3132949	6	32228158	C	NA	-0.224394	7.7e-102	C	T	-0.00177016	0.000321935	3.83597e-08	C	T	-0.00290102	0.000407904	1.14756e-12
RA	rs28858179	6	32234013	ATTACTATTTTG	NA	0.242946	4.3e-12	A	T	-0.00119149	0.000877973	0.174753	A	T	-0.00115563	0.00111177	0.298599
RA	rs146852891	6	32235965	T	NA	-0.18633	8e-09	T	G	-0.00114771	0.00125471	0.360337	T	G	-0.00315155	0.00160198	0.0491518
RA	rs9267954	6	32245275	T	NA	0.306749	1e-200	T	A	0.00245572	0.00034097	5.95159e-13	T	A	0.00533777	0.000430542	2.77065e-35
RA	rs114484678	6	32247280	C	NA	0.24686	4.2e-30	C	T	0.00122446	0.000746483	0.100945	C	T	0.00181352	0.000957191	0.0581439
RA	rs552042887	6	32295359	C	NA	-0.309246	6.6e-10	C	A	-0.00210924	0.000724128	0.00358259	C	A	-0.0044349	0.000917602	1.34493e-06
RA	rs2076536	6	32371571	C	NA	-0.341083	1e-200	T	C	0.00161149	0.000327034	8.33225e-07	T	C	0.00442307	0.000414489	1.41284e-26
RA	rs3806155	6	32405601	T	NA	0.532978	2.6e-182	T	A	0.00365475	0.000809391	6.3231e-06	T	A	0.00933241	0.00102499	8.71313e-20
RA	rs77709411	6	32412984	C	NA	-0.314711	6.1e-11	C	A	-0.00197791	0.00159735	0.215626	C	A	-0.00133354	0.0020002	0.50496
RA	rs9268560	6	32421735	G	NA	0.421338	1e-200	G	C	0.00259951	0.000298624	3.20494e-18	G	C	0.00474002	0.000378637	6.09485e-36
RA	rs146003472	6	32422974	C	NA	0.724646	5.9e-166	C	T	0.00638723	0.00117052	4.85603e-08	C	T	0.00986692	0.00150033	4.82927e-11
RA	rs35880697	6	32465982	T	NA	0.431782	1e-200	T	C	0.00249745	0.000421001	2.99562e-09	T	C	0.00490672	0.000533146	3.503e-20
RA	rs9269237	6	32485806	T	NA	-0.345311	1e-200	T	C	-0.00185745	0.000315642	3.99552e-09	T	C	-0.00294176	0.000400452	2.04869e-13
RA	rs139580312	6	32512484	ACTGCATGGTT	NA	0.447886	1e-200	A	G	-0.00297621	0.000632834	2.56593e-06	A	G	-0.00432682	0.000797191	5.71888e-08
RA	rs185320691	6	32522515	GGCACTT	NA	0.750944	1e-200	C	G	0.0051692	0.000537142	6.44578e-22	C	G	0.00935829	0.00068104	6.02681e-43
RA	rs28417075	6	32551236	T	NA	0.524729	1.4e-70	T	A	0.00656421	0.0005683	7.53191e-31	T	A	0.0100555	0.00071996	2.61294e-44
RA	rs539705259	6	32606760	ACAGAGTATAACTGAT	NA	-0.245901	9.5e-81	G	A	-0.00231145	0.00162366	0.154562	G	A	-0.00379246	0.00206861	0.0667546
RA	rs1281934	6	32616605	G	NA	0.598837	1e-200	G	A	0.0062609	0.000564618	1.45608e-28	G	A	0.0107353	0.000715282	6.90285e-51
RA	rs34278657	6	32617149	AATAGCGATAATAGT	NA	0.413433	1e-200	G	A	-0.0022716	0.000785971	0.00385071	G	A	-0.003323	0.000995492	0.000843866
RA	rs112825449	6	32617351	TT	NA	0.643432	1e-200	A	T	-0.000142651	0.00191214	0.940531	A	T	-0.000474872	0.00250162	0.849446
RA	rs115350662	6	32629301	AGCCTCCCACAAAAAAATA	NA	-0.235722	1.8e-81	T	A	-0.00150504	0.00109994	0.17122	T	A	0.000165541	0.00140028	0.905894
RA	rs9272324	6	32636375	G	NA	0.340037	1e-200	G	A	0.00220862	0.0003019	2.57133e-13	G	A	0.00513071	0.000383376	7.92812e-41
RA	rs28667353	6	32651351	A	NA	-0.10425	5.5e-10	G	A	0.000427305	0.000329323	0.194451	G	A	0.00127733	0.000418687	0.00228266
RA	rs9394104	6	32652426	G	NA	-0.215672	2.6e-85	G	A	-0.000230349	0.000320481	0.47229	G	A	0.000709626	0.000407434	0.0815632
RA	rs9274881	6	32673288	C	NA	0.327143	1e-200	C	A	0.00128947	0.000319959	5.57769e-05	C	A	0.00334481	0.000406409	1.88126e-16
RA	rs2894381	6	32714451	A	NA	-0.302457	2.9e-139	A	G	-0.00168084	0.000378082	8.76564e-06	A	G	-0.00314935	0.000479127	4.94015e-11
RA	rs9275601	6	32714887	T	NA	-0.100926	1.3e-24	T	C	-0.000722451	0.000302585	0.01696	T	C	-0.000700775	0.000383342	0.0675409
RA	rs6935940	6	32715914	C	NA	0.110647	1.4e-24	C	A	0.000255133	0.000352747	0.469512	C	A	0.000846171	0.000446362	0.0580002
RA	rs5021453	6	32740347	G	NA	-0.226901	4.9e-95	G	A	-0.00133465	0.000311179	1.79564e-05	G	A	-0.00265005	0.000395016	1.9689e-11
RA	rs2239800	6	32745490	G	NA	-0.164875	4.3e-22	G	A	-0.00163791	0.000556931	0.00327248	G	A	-0.00207944	0.000713094	0.00354496
RA	rs56144236	6	32752442	A	NA	-0.239527	3.8e-10	A	G	-0.00159824	0.00088867	0.0721049	A	G	-0.0044885	0.00113667	7.85711e-05
RA	rs9276703	6	32789017	A	NA	-0.211956	1.4e-103	T	A	0.00109377	0.000307393	0.000373508	T	A	0.00310532	0.000389776	1.63514e-15
RA	rs17219974	6	32794979	T	NA	0.286682	3.9e-25	T	A	-0.000930286	0.00127429	0.465367	T	A	0.000826699	0.00162017	0.609873
RA	rs1894406	6	32819279	T	NA	-0.0725707	2.5e-13	T	C	-0.000277639	0.000322028	0.388602	T	C	-0.00077742	0.000407373	0.0563443
RA	rs59377618	6	32820360	C	NA	0.188138	5.3e-50	C	T	0.00108208	0.000484996	0.0256745	C	T	0.00280329	0.000612128	4.66177e-06
RA	rs9368744	6	32830522	T	NA	0.273076	4.9e-17	T	C	-0.00121136	0.00115308	0.293471	T	C	0.00299606	0.00147918	0.042819
RA	rs62397687	6	32834232	T	NA	0.105261	3.3e-20	T	C	-0.000166848	0.000384972	0.664723	T	C	0.00129128	0.000489497	0.00834072
RA	rs17583244	6	32836910	C	NA	-0.191161	6.7e-21	C	T	-0.000680915	0.000611686	0.265633	C	T	-0.00332225	0.000773572	1.75024e-05
RA	rs3819721	6	32837021	A	NA	0.230318	6.4e-111	A	G	0.00186238	0.000345596	7.09896e-08	A	G	0.00384737	0.000438456	1.7255e-18
RA	rs4711312	6	32846882	G	NA	-0.154317	1.9e-32	G	A	-0.000915406	0.000446776	0.0404719	G	A	-0.00102581	0.000562056	0.0679883
RA	rs113206908	6	32850253	C	NA	0.358374	1e-43	C	T	0.00219198	0.000959793	0.0223842	C	T	0.00423803	0.00121989	0.000512667
RA	rs9276831	6	32864256	G	NA	-0.239527	3.1e-54	G	A	-0.00142018	0.00049294	0.00396406	G	A	-0.00281032	0.000627674	7.56182e-06
RA	rs144112342	6	32890300	C	NA	0.300845	1.4e-23	C	T	0.000475341	0.000981291	0.6281	C	T	0.00217844	0.0012389	0.0786872
RA	rs151726	6	32921108	C	NA	-0.297059	1.6e-09	C	G	-0.00148735	0.00122963	0.226435	C	G	-0.00336204	0.00156717	0.031931
RA	rs154977	6	32932241	C	NA	-0.115411	1.2e-28	G	C	0.000984134	0.000315614	0.00182015	G	C	0.00225361	0.000400124	1.78091e-08
RA	rs154973	6	32932865	T	NA	-0.219401	4.3e-32	T	C	-0.00116389	0.000510409	0.0225912	T	C	-0.00251999	0.000646101	9.61063e-05
RA	rs1063478	6	32949767	T	NA	-0.0921153	8e-10	T	C	-0.00115256	0.000461718	0.0125528	T	C	-0.00172595	0.000585638	0.00320785
RA	rs9276933	6	32963018	C	NA	-0.105361	2.3e-11	C	T	-0.00073701	0.0004505	0.101845	C	T	-0.000875507	0.000571756	0.125707
RA	rs3129296	6	32970514	G	NA	-0.146183	1.5e-28	C	G	0.000338135	0.000464299	0.466449	C	G	0.00221311	0.000584543	0.000153108
RA	rs527436644	6	32975283	GGTGTGT	NA	-0.265268	1.4e-12	T	G	-3.7392e-05	0.000932869	0.968027	T	G	-0.000618307	0.00120754	0.608625
RA	rs143704530	6	32989385	A	NA	0.138892	4.9e-09	A	G	-0.000305654	0.000924827	0.741024	A	G	-0.000109445	0.00116856	0.925381
RA	rs3128947	6	32997285	G	NA	0.204572	5.2e-60	G	A	0.00208451	0.000385689	6.50314e-08	G	A	0.00362099	0.000490604	1.58102e-13
RA	rs12192933	6	33001613	A	NA	-0.0693501	5.9e-10	A	C	-0.00069138	0.000352421	0.0497872	A	C	-0.000677434	0.00044695	0.129601
RA	rs35776718	6	33005126	A	NA	0.112435	1.9e-17	A	G	0.00192521	0.000417648	4.03639e-06	A	G	0.00270435	0.000530186	3.3861e-07
RA	rs3135198	6	33023581	C	NA	0.0980337	1e-18	C	T	0.000350222	0.000330066	0.288661	C	T	0.000609927	0.000417922	0.14445
RA	rs440841	6	33051866	T	NA	-0.147341	4.4e-55	G	T	0.000951631	0.000299583	0.0014908	G	T	0.00247558	0.000379176	6.6438e-11
RA	rs113119046	6	33053353	A	NA	-0.199671	2.8e-25	A	C	-0.00186986	0.000661022	0.00467363	A	C	-0.000684487	0.000837698	0.41387
RA	rs3130183	6	33056219	T	NA	0.0525925	2.3e-08	A	T	-0.0010998	0.000306374	0.000331119	A	T	-0.000668163	0.000387204	0.0844195
RA	rs4582419	6	33072361	A	NA	-0.236989	1e-19	A	G	-0.00194456	0.000794044	0.0143291	A	G	-0.00305935	0.00100937	0.00243813
RA	rs73741626	6	33078356	T	NA	-0.327116	4.9e-24	T	C	-0.00213786	0.000752552	0.00450048	T	C	-0.00255182	0.000950997	0.00729043
RA	rs2856822	6	33079655	C	NA	-0.161343	2.3e-54	C	A	-0.00131588	0.000322806	4.57656e-05	C	A	-0.00135653	0.00040991	0.000935295
RA	rs9501249	6	33081819	G	NA	-0.282363	6.9e-12	G	T	-0.00282159	0.00119678	0.0183927	G	T	-0.0027237	0.00149836	0.0690983
RA	rs3129287	6	33121327	T	NA	-0.105361	1.1e-22	T	G	-0.000421093	0.000347399	0.225465	T	G	-0.000792779	0.000438389	0.070547
RA	rs9277771	6	33131594	A	NA	0.163818	5.1e-39	A	C	0.00077982	0.000409768	0.0570321	A	C	0.00270162	0.000521428	2.20686e-07
RA	rs116562357	6	33149882	C	NA	0.300845	2e-14	C	T	0.00285952	0.00219471	0.192607	C	T	0.000486456	0.00276223	0.860208
RA	rs3129205	6	33158082	T	NA	-0.0779615	3.9e-15	T	G	-0.000613611	0.000319543	0.054825	T	G	-0.0006344	0.000404478	0.11678
RA	rs115375106	6	33181535	T	NA	0.189794	9.9e-09	T	C	0.00285698	0.00113348	0.0117187	T	C	0.00444472	0.00144086	0.00203737
RA	rs17847933	6	33198003	C	NA	-0.14387	1.8e-08	C	G	-0.00129608	0.000789338	0.100597	C	G	-0.00106723	0.000997565	0.284696
RA	rs2854027	6	33212268	C	NA	0.112435	3.7e-20	C	T	0.00132755	0.000402541	0.000974249	C	T	0.00231202	0.000511183	6.10387e-06
RA	rs12191464	6	33259741	T	NA	-0.265268	6.7e-15	T	C	-0.00280109	0.00135337	0.0384808	T	C	0.000142694	0.00167895	0.93227
RA	rs3130268	6	33339623	G	NA	0.110647	1.1e-27	G	T	0.00065856	0.000299734	0.0280113	G	T	0.00249547	0.000380584	5.50571e-11
RA	rs148208180	6	33346867	C	NA	-0.233194	1.9e-08	C	T	-0.0006858	0.00149548	0.646534	C	T	0.000999741	0.00187976	0.594834
RA	rs68191	6	33512961	C	NA	-0.12897	4.4e-12	C	T	-0.00106921	0.000519858	0.0397133	C	T	-0.00157644	0.000658419	0.0166536
RA	rs72880049	6	33525062	A	NA	0.0760347	6.6e-10	A	G	-0.000609614	0.00040751	0.134669	A	G	0.00119866	0.000519288	0.0209853
RA	rs386906	6	33591138	C	NA	-0.0544562	2e-08	T	C	0.000548466	0.000314842	0.0815033	T	C	0.000374867	0.000399397	0.347946
RA	rs493932	6	33613759	CGGGGTGTGTGTGTGTGTGTGTGTGTGTGTGTGTG	NA	0.19062	5.7e-25	G	C	-0.000226093	0.00046874	0.629563	G	C	0.001809	0.000596266	0.00241456
RA	rs12204421	6	33661086	G	NA	-0.080126	1.5e-13	G	A	-0.000213641	0.000344887	0.53562	G	A	-0.000577417	0.000438013	0.187416
RA	rs113451798	6	33678338	T	NA	0.19062	2.3e-13	T	C	0.00191576	0.000858352	0.0256222	T	C	0.00386203	0.00109222	0.000406437
RA	rs9469556	6	33680884	A	NA	0.0998453	2.8e-22	A	G	0.000258583	0.000348825	0.458514	A	G	0.0024049	0.000443537	5.89768e-08
RA	rs139333827	6	33741515	A	NA	0.219136	1.2e-10	A	G	0.00303612	0.000994731	0.00227201	A	G	0.00673495	0.00128165	1.48239e-07
RA	rs1547669	6	33807864	G	NA	0.0751075	5.8e-16	G	A	0.00106075	0.000299719	0.000401516	G	A	0.000909026	0.000380145	0.0167915
RA	rs7761859	6	33836360	T	NA	0.0741794	2.3e-12	C	T	-1.7938e-05	0.000360381	0.960302	C	T	-0.00116874	0.000457402	0.0106145
RA	rs6457745	6	33874855	C	NA	-0.0576291	3.2e-08	C	A	-0.000451102	0.000305838	0.140222	C	A	-2.1091e-05	0.000387034	0.956542
RA	rs2671427	6	385735	T	NA	-0.0534008	2.2e-08	C	T	0.000427989	0.000313294	0.171912	C	T	0.000616609	0.00039736	0.120721
RA	rs3757387	7	128936032	C	NA	0.07139	1.5e-14	C	T	0.000680904	0.000300758	0.0235777	C	T	0.00112441	0.000382238	0.00326503
RA	rs34420397	7	129070248	A	NA	0.0889262	1e-11	A	C	0.000130777	0.000466343	0.779147	A	C	0.0012747	0.000595564	0.0323302
RA	rs79758729	7	37378851	G	NA	0.0870947	1.5e-09	G	A	0.00111278	0.000484034	0.0215083	G	A	0.000628922	0.000619099	0.309694
RA	rs10261758	7	50313596	G	NA	0.0685928	3.6e-12	A	G	-0.00102007	0.000331996	0.00212272	A	G	-0.0012219	0.000420922	0.0036974
RA	rs1660322	8	100265412	C	NA	0.064851	8.6e-11	C	T	0.000999453	0.000323192	0.00198547	C	T	-0.000251751	0.000410039	0.539237
RA	rs2409780	8	11480078	C	NA	0.0741794	1.3e-12	C	T	0.000708575	0.000345628	0.0403556	C	T	0.000850107	0.000436012	0.0512091
RA	rs4410871	8	127802783	T	NA	-0.058689	1.7e-08	C	T	0.000712205	0.00033234	0.0321147	C	T	1.71391e-05	0.000422696	0.967657
RA	rs13281279	8	128480072	A	NA	-0.0534008	2e-08	G	A	-0.000115808	0.000308025	0.706941	G	A	0.00108873	0.000390444	0.00529697
RA	rs7825794	8	128565240	T	NA	-0.0758017	2.3e-09	T	C	6.03138e-05	0.000402469	0.880876	T	C	-0.0009402	0.000510124	0.0653184
RA	rs184846530	8	128714998	G	NA	0.0861777	1.1e-08	G	C	0.000257976	0.000362321	0.47646	G	C	0.0014186	0.000458379	0.0019696
RA	rs10818481	9	120885577	TGGAAAAA	NA	0.076961	3.5e-10	C	T	-0.000280513	0.000312785	0.369814	C	T	-0.00102812	0.000396866	0.0095817
RA	rs28465657	6	32652195	T	NA	0.138021	3.6e-16	NA	NA	NA	NA	NA	NA	NA	NA	NA	NA
RA	rs199880862	11	118764821	TACACAC	NA	-0.0844692	3e-08	NA	NA	NA	NA	NA	NA	NA	NA	NA	NA
RA	rs564813635	6	32488121	GTGTAGTAGCAAGTATAAA	NA	0.242162	9.6e-18	NA	NA	NA	NA	NA	NA	NA	NA	NA	NA
RA	rs1064713	6	32578889	GCTGCCATCAAAGCTGTGGGG	NA	-0.537854	1.9e-140	NA	NA	NA	NA	NA	NA	NA	NA	NA	NA
RA	rs374532386	6	32469562	T	NA	0.491643	1.3e-98	NA	NA	NA	NA	NA	NA	NA	NA	NA	NA
RA	rs13201769	6	30788289	A	NA	-0.103141	1.5e-22	NA	NA	NA	NA	NA	NA	NA	NA	NA	NA
RA	rs182969435	6	32521878	T	NA	0.396088	1e-200	NA	NA	NA	NA	NA	NA	NA	NA	NA	NA
RA	rs281863594	6	32663043	T	NA	0.251537	9.7e-54	NA	NA	NA	NA	NA	NA	NA	NA	NA	NA
RA	rs61439611	6	30487330	GTTTTTTTT	NA	0.140631	3.3e-19	NA	NA	NA	NA	NA	NA	NA	NA	NA	NA
RA	rs111936749	6	31555235	CTTT	NA	0.152721	9.3e-23	NA	NA	NA	NA	NA	NA	NA	NA	NA	NA
RA	rs189165836	6	32522574	T	NA	0.498955	9.5e-24	NA	NA	NA	NA	NA	NA	NA	NA	NA	NA
RA	rs115590118	6	32688315	T	NA	0.0971267	4.2e-15	NA	NA	NA	NA	NA	NA	NA	NA	NA	NA
RA	rs140071417	6	32514173	CATAGTGGTGACATCAGTGTTTCT	NA	0.304539	5.4e-09	NA	NA	NA	NA	NA	NA	NA	NA	NA	NA
RA	rs190942379	6	26910015	G	NA	-0.115411	5.3e-10	NA	NA	NA	NA	NA	NA	NA	NA	NA	NA
RA	rs3132136	6	32886210	GGATA	NA	-0.226901	3.6e-09	NA	NA	NA	NA	NA	NA	NA	NA	NA	NA
RA	rs113664977	6	32503231	GTTTATTACTG	NA	0.304539	2.5e-19	NA	NA	NA	NA	NA	NA	NA	NA	NA	NA
RA	rs9266539	6	31374164	A	NA	-0.200893	2.7e-52	NA	NA	NA	NA	NA	NA	NA	NA	NA	NA
RA	rs114652772	6	31284249	C	NA	0.111541	3.5e-08	NA	NA	NA	NA	NA	NA	NA	NA	NA	NA
RA	rs114805492	6	29928061	CGCA	NA	0.1415	1.4e-25	NA	NA	NA	NA	NA	NA	NA	NA	NA	NA
RA	rs115185185	6	32541698	T	NA	0.335758	8.2e-20	NA	NA	NA	NA	NA	NA	NA	NA	NA	NA
RA	rs2857096	6	32943271	C	NA	0.177309	2.9e-74	NA	NA	NA	NA	NA	NA	NA	NA	NA	NA
RA	rs71550008	6	426247	CG	NA	-0.0704225	1.1e-08	NA	NA	NA	NA	NA	NA	NA	NA	NA	NA
RA	rs72687965	1	113530530	C	NA	0.194744	2.2e-17	NA	NA	NA	NA	NA	NA	NA	NA	NA	NA
RA	rs11554462	6	32584304	G	NA	-0.287682	1.4e-45	NA	NA	NA	NA	NA	NA	NA	NA	NA	NA
RA	rs549191441	6	32991681	TTTTTATTGTTGTTCCATAG	NA	0.146694	1.2e-27	NA	NA	NA	NA	NA	NA	NA	NA	NA	NA
RA	rs35581359	6	30965354	G	NA	0.116004	6.2e-34	NA	NA	NA	NA	NA	NA	NA	NA	NA	NA
RA	rs9469148	6	32511987	G	NA	-0.199671	6.8e-36	NA	NA	NA	NA	NA	NA	NA	NA	NA	NA
RA	rs560438058	6	32702381	TGTGTGTGTGTGTGTGTGTGTGTGTGTGCACGTGCATGTGT	NA	0.582774	1e-200	NA	NA	NA	NA	NA	NA	NA	NA	NA	NA
RA	rs150420498	6	33489728	A	NA	0.29788	2.9e-45	NA	NA	NA	NA	NA	NA	NA	NA	NA	NA
RA	rs116669775	6	32573457	T	NA	-0.421594	2e-71	NA	NA	NA	NA	NA	NA	NA	NA	NA	NA
RA	rs75438822	6	29633968	GGTGTGTGTGTGTGTGTGTGTGTGTGTGTG	NA	0.109751	2.9e-09	NA	NA	NA	NA	NA	NA	NA	NA	NA	NA
RA	rs9278218	6	29635802	TCCGCCCCG	NA	-0.0954102	4.5e-15	NA	NA	NA	NA	NA	NA	NA	NA	NA	NA
RA	rs576250519	6	33353989	TG	NA	-0.0954102	5.9e-12	NA	NA	NA	NA	NA	NA	NA	NA	NA	NA
RA	rs144094035	6	32313688	C	NA	0.413433	5.1e-172	NA	NA	NA	NA	NA	NA	NA	NA	NA	NA
RA	rs281864337	6	32661245	T	NA	-0.260067	3.4e-106	NA	NA	NA	NA	NA	NA	NA	NA	NA	NA
RA	rs41541218	6	32522009	G	NA	-0.214432	1.5e-41	NA	NA	NA	NA	NA	NA	NA	NA	NA	NA
RA	rs548542825	6	33595774	TTTT	NA	0.0934903	1.4e-09	NA	NA	NA	NA	NA	NA	NA	NA	NA	NA
RA	rs28746784	6	32664484	T	NA	-0.164875	1.4e-09	NA	NA	NA	NA	NA	NA	NA	NA	NA	NA
RA	rs61775167	1	25454402	GTG	NA	0.07139	3.1e-09	NA	NA	NA	NA	NA	NA	NA	NA	NA	NA
RA	rs576544709	6	32487766	CA	NA	-0.417032	9.8e-185	NA	NA	NA	NA	NA	NA	NA	NA	NA	NA
RA	rs41316148	6	32008975	C	NA	-0.203341	4e-14	NA	NA	NA	NA	NA	NA	NA	NA	NA	NA
RA	rs199893722	6	32689853	ACTGCCTGC	NA	0.586675	1e-200	NA	NA	NA	NA	NA	NA	NA	NA	NA	NA
RA	rs143845848	6	32514177	A	NA	0.466247	1e-200	NA	NA	NA	NA	NA	NA	NA	NA	NA	NA
RA	rs201540428	6	32589709	A	NA	-0.329894	1.9e-19	NA	NA	NA	NA	NA	NA	NA	NA	NA	NA
RA	rs138662522	6	32670488	C	NA	-0.267879	6.8e-10	NA	NA	NA	NA	NA	NA	NA	NA	NA	NA
RA	rs9270060	6	32586197	C	NA	-0.225647	1.2e-25	NA	NA	NA	NA	NA	NA	NA	NA	NA	NA

## Sheet: Table S8
Table S8. SNPs used to construct polygenic risk score (PRS) of type 1 diabetes mellitus (T1D)
Disease	SNP	chr	pos	Both sex					Male					Female
				alt	ref	beta	se	pval	alt	ref	beta	se	pval	alt	ref	beta	se	pval
T1D	rs7552539	1	113267461	G	A	0.181268	0.021967	1.56e-16	G	A	0.000336019	0.00024626	0.172417	G	A	0.000188501	0.000176779	0.286285
T1D	rs736202	1	113276758	T	C	0.195251	0.025095	7.22e-15	T	C	0.000576157	0.000297102	0.0524719	T	C	0.000401423	0.000212297	0.0586449
T1D	rs773566	1	113278962	C	T	0.112319	0.01443	7.05e-15	C	T	0.000209042	0.000162712	0.198887	C	T	0.000288894	0.000116504	0.0131503
T1D	rs12086096	1	113314231	A	G	0.177256	0.016874	8.19e-26	A	G	0.000279614	0.000190858	0.142912	A	G	0.000175374	0.00013656	0.199064
T1D	rs12126425	1	113371768	G	A	0.272119	0.02092	1.1e-38	G	A	8.87538e-05	0.000245228	0.717409	G	A	0.000650028	0.00017557	0.000213635
T1D	rs12039603	1	113379612	C	T	0.157109	0.018726	4.87e-17	C	T	0.000175854	0.000221354	0.426938	C	T	0.000278225	0.000158711	0.0795994
T1D	rs115985944	1	113611678	C	T	0.599835	0.058669	1.55e-24	C	T	0.000927282	0.000749778	0.216184	C	T	0.00186906	0.00053472	0.000473441
T1D	rs55912359	1	113624477	T	C	-0.13868	0.014201	1.59e-22	T	C	-0.000320208	0.000158947	0.0439529	T	C	-6.81068e-05	0.00011334	0.547904
T1D	rs6679677	1	113761186	A	C	0.64172	0.020938	1e-200	A	C	0.00135866	0.000258047	1.40235e-07	A	C	0.000661028	0.000185525	0.00036671
T1D	rs1746853	1	113840475	C	A	-0.129823	0.014083	3.02e-20	C	A	-0.000227801	0.000158371	0.150322	C	A	-0.000111965	0.000113223	0.322717
T1D	rs189306022	1	113904989	C	T	0.621769	0.068291	8.65e-20	C	T	0.00199947	0.00130139	0.124439	C	T	0.000648852	0.000944544	0.492117
T1D	rs36064592	1	113920040	A	G	-0.143533	0.015128	2.35e-21	A	G	-0.000184215	0.000168071	0.273055	A	G	-0.000330468	0.000119803	0.00580856
T1D	rs7520320	1	113992671	T	C	0.259007	0.021498	1.99e-33	T	C	0.000342828	0.000255841	0.180246	T	C	0.000193226	0.000181924	0.288182
T1D	rs139269023	1	114016785	A	T	0.295518	0.051494	9.53e-09	A	T	-0.000927445	0.000593173	0.117929	A	T	-0.000134691	0.000421878	0.749525
T1D	rs74714424	1	114018622	G	T	0.257958	0.032105	9.38e-16	G	T	0.000441533	0.000364783	0.226128	G	T	0.000672538	0.000261945	0.010245
T1D	rs61819212	1	114046589	G	A	0.348772	0.046791	9.07e-14	G	A	0.00161953	0.000570317	0.00451613	G	A	0.000232104	0.000403716	0.565346
T1D	rs61812210	1	114086790	T	C	-0.090249	0.016088	2.03e-08	T	C	-3.53625e-05	0.000174909	0.839779	T	C	-0.00020192	0.000125376	0.107287
T1D	rs72690067	1	114098144	T	G	0.431499	0.067368	1.5e-10	T	G	0.000875167	0.000768898	0.255034	T	G	0.000398284	0.000553209	0.471555
T1D	rs1493696	1	119962909	A	G	0.128326	0.022282	8.45e-09	A	G	0.000248003	0.000238468	0.298349	A	G	0.000441403	0.00017051	0.00963397
T1D	rs10801128	1	192546719	G	A	0.096073	0.015681	8.98e-10	G	A	0.00028464	0.000173376	0.100644	G	A	3.31466e-05	0.000123739	0.788795
T1D	rs17668272	1	198654713	T	G	-0.13739	0.02272	1.48e-09	T	G	-0.000200046	0.00024466	0.413558	T	G	-0.000153976	0.000174122	0.376538
T1D	rs10920052	1	200851482	A	C	0.100993	0.017183	4.17e-09	A	C	-1.12932e-05	0.000200549	0.955094	A	C	0.000243026	0.000143061	0.0893669
T1D	rs3024493	1	206770623	A	C	-0.163855	0.019641	7.26e-17	A	C	-4.79924e-05	0.00021753	0.825385	A	C	-0.000212619	0.000155606	0.171818
T1D	rs6689179	1	206793397	A	G	-0.086746	0.015205	1.16e-08	A	G	-0.000163131	0.000174118	0.348812	A	G	-7.32324e-05	0.000124619	0.556769
T1D	rs12128789	1	212679490	C	T	0.126969	0.021535	3.73e-09	C	T	-5.86555e-05	0.000228774	0.79765	C	T	1.38791e-05	0.000163085	0.932179
T1D	rs10751776	1	24970252	C	A	0.078145	0.01405	2.67e-08	C	A	0.00028759	0.000157403	0.067688	C	A	0.000243239	0.000112402	0.0304653
T1D	rs574384	1	35622060	A	C	-0.133602	0.023876	2.2e-08	A	C	-0.000151402	0.000271989	0.577768	A	C	0.000161	0.00019405	0.40672
T1D	rs12742756	1	37881745	G	A	-0.083107	0.015077	3.54e-08	G	A	-0.000166235	0.000159063	0.295984	G	A	4.41492e-05	0.000113671	0.697725
T1D	rs855330	1	63648218	C	T	0.111208	0.016916	4.89e-11	C	T	0.000131853	0.000186702	0.48005	C	T	0.000161292	0.000133582	0.227264
T1D	rs722988	10	33137219	C	T	0.082649	0.014412	9.78e-09	C	T	0.000178825	0.000164009	0.275567	C	T	6.56776e-05	0.00011717	0.575116
T1D	rs7893467	10	6037072	T	G	-0.190465	0.026583	7.78e-13	T	G	-0.000363998	0.000307211	0.23608	T	G	-0.000347079	0.000218702	0.112515
T1D	rs11256442	10	6037381	C	T	-0.155601	0.015145	9.23e-25	C	T	-0.000315389	0.000174889	0.0713325	C	T	0.000105729	0.000125124	0.398116
T1D	rs61839660	10	6052734	T	C	-0.357441	0.026	5.25e-43	T	C	-0.000705091	0.000263663	0.00749117	T	C	-9.6687e-05	0.000187571	0.606227
T1D	rs7090530	10	6068912	A	C	0.192842	0.014501	2.35e-40	A	C	0.000171934	0.000160706	0.284678	A	C	0.000191745	0.000115058	0.0956142
T1D	rs41295159	10	6106572	G	C	-0.699552	0.090252	9.11e-15	G	C	-0.00128338	0.000751197	0.0875561	G	C	-0.000267533	0.000544568	0.623232
T1D	rs77347828	10	6126327	A	G	0.15181	0.02079	2.83e-13	A	G	0.000178437	0.000237402	0.452277	A	G	0.000297443	0.000169929	0.0800505
T1D	rs61839727	10	6143904	A	C	-0.122171	0.018787	7.88e-11	A	C	-0.000243876	0.000201359	0.22584	A	C	-0.000171186	0.000144381	0.235761
T1D	rs11596750	10	6429854	C	T	-0.088663	0.015257	6.2e-09	C	T	-0.000183921	0.000173964	0.290404	C	T	-0.00014821	0.000124074	0.232273
T1D	rs78325861	10	70618733	G	C	-0.282082	0.042195	2.31e-11	G	C	2.60027e-05	0.000397556	0.94785	G	C	-0.000336609	0.00028504	0.237636
T1D	rs537544	10	8066419	T	C	-0.086411	0.01502	8.77e-09	T	C	3.10868e-05	0.000162781	0.848546	T	C	-0.000139218	0.000116745	0.233066
T1D	rs7068821	10	88291278	T	G	-0.165103	0.016333	5.07e-24	T	G	-0.000366135	0.000179243	0.0410861	T	G	-0.000259003	0.000128756	0.0442652
T1D	rs607703	11	128734279	T	C	0.092015	0.01428	1.17e-10	T	C	0.00061116	0.000157751	0.000107016	T	C	0.000267335	0.00011265	0.0176377
T1D	rs74764171	11	2051604	T	C	-0.198191	0.020507	4.27e-22	T	C	-0.000618985	0.000208017	0.00292418	T	C	-0.000308367	0.000148122	0.0373578
T1D	rs143281229	11	2095438	T	G	0.286849	0.050324	1.2e-08	T	G	0.00140917	0.000574742	0.0142139	T	G	0.000394827	0.000414474	0.340795
T1D	rs117996750	11	2095833	C	T	-0.374246	0.050067	7.73e-14	C	T	-0.00111073	0.000438582	0.0113246	C	T	-0.000181246	0.000309887	0.558631
T1D	rs72851024	11	2109698	C	G	-0.513212	0.045495	1.64e-29	C	G	-0.000538228	0.000415836	0.195554	C	G	-0.000418223	0.00030209	0.166228
T1D	rs7936748	11	2112728	A	G	-0.226177	0.032345	2.7e-12	A	G	0.000556132	0.000315227	0.0776954	A	G	-0.000209572	0.000227334	0.356598
T1D	rs112592107	11	2114981	A	G	-0.243147	0.035792	1.1e-11	A	G	-0.000781621	0.000357843	0.028945	A	G	-0.000174642	0.000254395	0.492399
T1D	rs113257255	11	2133952	G	C	0.395887	0.066496	2.62e-09	G	C	-0.000387851	0.00077105	0.614953	G	C	-2.26567e-05	0.000555781	0.967483
T1D	rs10840442	11	2150692	C	T	0.174947	0.018235	8.48e-22	C	T	0.000353245	0.000202729	0.0814325	C	T	2.83328e-05	0.000143969	0.843985
T1D	rs7110099	11	2154875	G	A	0.662564	0.020187	1e-200	G	A	0.00118899	0.000187078	2.08155e-10	G	A	0.000585676	0.000134401	1.31518e-05
T1D	rs3842767	11	2157765	T	C	0.160314	0.023253	5.41e-12	T	C	0.000319029	0.000254801	0.210546	T	C	0.000221195	0.00018245	0.225378
T1D	rs3842749	11	2160108	A	G	-0.630967	0.036942	2.09e-65	A	G	-0.000429491	0.000333341	0.197594	A	G	-0.000204933	0.000238201	0.389604
T1D	rs7482510	11	2169361	G	C	0.265425	0.017626	3.01e-51	G	C	0.000699169	0.000199652	0.000462003	G	C	9.88509e-05	0.000142734	0.488591
T1D	rs7925375	11	2169925	C	T	-0.176095	0.017347	3.26e-24	C	T	-0.000435733	0.000189972	0.0218104	C	T	-0.000279368	0.000135563	0.0393233
T1D	rs4930045	11	2175194	C	T	0.319574	0.015486	1.3e-94	C	T	0.000566609	0.000162173	0.000476236	C	T	0.000354215	0.000115898	0.00224143
T1D	rs79889619	11	2182419	A	G	-0.63969	0.0631	3.76e-24	A	G	-0.000388252	0.000551446	0.481395	A	G	-0.000265162	0.000399371	0.506725
T1D	rs11564699	11	2192355	T	C	-0.363636	0.029154	1.05e-35	T	C	-0.000602396	0.000299041	0.0439662	T	C	-2.10179e-05	0.000213853	0.921708
T1D	rs11043056	11	2194933	T	C	0.216966	0.014833	1.88e-48	T	C	0.000412325	0.000159015	0.00951532	T	C	0.000191629	0.000113905	0.0925024
T1D	rs4930058	11	2242683	G	A	0.141449	0.01942	3.25e-13	G	A	0.000114553	0.000217827	0.598968	G	A	0.000162622	0.000156413	0.298483
T1D	rs34433635	11	2249081	G	C	-0.309979	0.045261	7.45e-12	G	C	-0.00106099	0.000430957	0.0138198	G	C	-0.000595418	0.000308813	0.0538458
T1D	rs7104786	11	2284938	T	C	-0.082988	0.015061	3.59e-08	T	C	-0.000273009	0.000160746	0.0894365	T	C	-0.000199376	0.000114936	0.0828019
T1D	rs149265662	11	2295504	A	G	-0.329138	0.050825	9.42e-11	A	G	-0.0012232	0.000528748	0.020702	A	G	0.000152343	0.000380035	0.688519
T1D	rs663743	11	64340263	A	G	-0.099964	0.015092	3.5e-11	A	G	0.000281819	0.000166397	0.090332	A	G	-4.11887e-05	0.000118611	0.728397
T1D	rs7936434	11	76582761	C	G	0.076923	0.013959	3.58e-08	C	G	0.000197754	0.000157697	0.209837	C	G	-3.73059e-06	0.000112426	0.973529
T1D	rs933296	12	110915044	C	A	-0.081655	0.014743	3.05e-08	C	A	-8.74121e-05	0.000167985	0.602815	C	A	-7.14356e-05	0.000120136	0.552097
T1D	rs2239196	12	111435363	A	G	-0.204224	0.037324	4.46e-08	A	G	-0.000356966	0.000401265	0.373681	A	G	-5.28494e-05	0.000289464	0.85513
T1D	rs3184504	12	111446804	C	T	-0.231498	0.014086	1.08e-60	C	T	-0.000255348	0.000157465	0.104886	C	T	-0.000264941	0.000112226	0.0182369
T1D	rs35662477	12	111875404	T	A	-0.185236	0.026215	1.6e-12	T	A	-0.00039766	0.000270328	0.141285	T	A	-5.27893e-05	0.000192742	0.784173
T1D	rs80223410	12	55974182	T	C	-0.147683	0.020715	1.01e-12	T	C	-0.000263974	0.000227924	0.246797	T	C	-0.000153866	0.000162322	0.343177
T1D	rs705703	12	55997702	T	C	0.24835	0.038703	1.39e-10	T	C	2.5595e-05	0.000440773	0.953694	T	C	0.00062708	0.000312457	0.0447581
T1D	rs1701704	12	56018703	G	T	0.244048	0.014558	4.52e-63	G	T	0.000211562	0.000165664	0.201586	G	T	0.000175829	0.000118106	0.136558
T1D	rs140116753	12	56098201	G	A	0.200826	0.029276	6.9e-12	G	A	0.000618067	0.000328494	0.0599033	G	A	6.08022e-05	0.000232836	0.793987
T1D	rs773653	12	56283266	T	C	-0.088749	0.014698	1.56e-09	T	C	0.000272745	0.000161111	0.0904761	T	C	2.84963e-05	0.000115022	0.80433
T1D	rs9517712	13	99427579	C	T	-0.102063	0.015805	1.06e-10	C	T	6.1421e-05	0.000181678	0.735306	C	T	-1.53738e-05	0.000129667	0.905621
T1D	rs238265	13	42356523	G	T	-0.090825	0.015158	2.08e-09	G	T	4.97032e-05	0.000172255	0.772931	G	T	-0.000154001	0.000123188	0.211253
T1D	rs56994090	14	100840110	C	T	-0.134255	0.014594	3.6e-20	C	T	-5.28112e-05	0.000159673	0.740836	C	T	-0.000297461	0.000114003	0.00907528
T1D	rs2104047	14	68287700	C	T	0.09389	0.016442	1.13e-08	C	T	0.000372214	0.000174905	0.0333313	C	T	-1.70784e-05	0.000124789	0.891143
T1D	rs17106304	14	68793794	G	C	0.115351	0.014812	6.83e-15	G	C	0.000174114	0.00016533	0.292283	G	C	6.65709e-05	0.000118359	0.573812
T1D	rs1350275	14	98022969	G	T	-0.093665	0.015283	8.86e-10	G	T	3.5656e-05	0.000176352	0.839771	G	T	-1.29732e-05	0.000125778	0.917849
T1D	rs34593439	15	78942615	A	G	-0.218071	0.024119	1.54e-19	A	G	-0.000274397	0.000257442	0.286489	A	G	-7.61554e-05	0.000184497	0.679773
T1D	rs79959429	16	11041115	T	C	-0.192842	0.03324	6.57e-09	T	C	-2.85759e-05	0.000338063	0.932636	T	C	-0.000150771	0.000242602	0.534289
T1D	rs12927355	16	11100914	T	C	-0.203881	0.015188	4.41e-41	T	C	-0.000110632	0.00016833	0.511029	T	C	-0.000176384	0.00012054	0.143393
T1D	rs1640916	16	11217518	C	A	-0.145073	0.020693	2.37e-12	C	A	-0.000275977	0.000240148	0.250476	C	A	-0.000125974	0.00017106	0.461467
T1D	rs71381201	16	11264003	G	T	-0.282731	0.046157	9.04e-10	G	T	0.000358339	0.000487537	0.462341	G	T	6.80805e-05	0.000348088	0.844936
T1D	rs13334203	16	11334681	A	G	-0.124941	0.015059	1.07e-16	A	G	-5.98423e-05	0.000166767	0.719717	A	G	-2.04074e-05	0.000119024	0.863865
T1D	rs8056901	16	11382368	C	T	-0.082581	0.014672	1.82e-08	C	T	9.77851e-05	0.000164723	0.552758	C	T	0.000261865	0.000117656	0.0260363
T1D	rs4238595	16	20331769	C	T	-0.112135	0.016708	1.93e-11	C	T	-3.59244e-05	0.000169165	0.831824	C	T	-6.52146e-05	0.000120997	0.589905
T1D	rs34838	16	28483029	G	A	-0.114301	0.01436	1.73e-15	G	A	-0.000168782	0.000158382	0.286576	G	A	-9.67454e-05	0.000113187	0.392696
T1D	rs231972	16	28527015	C	A	0.170939	0.021081	5.12e-16	C	A	0.000503869	0.000238245	0.0344386	C	A	0.000207633	0.000170326	0.222831
T1D	rs55993634	16	75202865	G	C	0.219371	0.024379	2.29e-19	G	C	-0.000684909	0.000290021	0.0181984	G	C	-1.82295e-07	0.000207178	0.999298
T1D	rs8046043	16	80250127	C	G	-0.084587	0.015175	2.49e-08	C	G	-0.000192817	0.000159438	0.226529	C	G	-2.52338e-06	0.000114347	0.982394
T1D	rs9891059	17	4397411	G	T	-0.114345	0.020045	1.17e-08	G	T	-9.81108e-05	0.000212848	0.64484	G	T	-3.94469e-05	0.000151771	0.794933
T1D	rs35327136	17	45410208	A	C	-0.119196	0.018978	3.37e-10	A	C	0.000120868	0.000202647	0.550879	A	C	-2.47452e-05	0.000145066	0.864555
T1D	rs11651753	17	47951723	T	C	-0.086888	0.014221	9.96e-10	T	C	-0.000225284	0.000158613	0.155512	T	C	-3.91535e-05	0.00011335	0.729778
T1D	rs57209021	17	68168777	T	C	0.100693	0.018297	3.73e-08	T	C	0.000353998	0.000188641	0.0605787	T	C	2.74546e-05	0.00013435	0.838079
T1D	rs61759532	17	7337072	T	C	0.118379	0.018587	1.91e-10	T	C	-7.89309e-05	0.000187549	0.673861	T	C	-6.25292e-06	0.000133676	0.962691
T1D	rs7237497	18	12777326	C	T	-0.220466	0.018635	2.71e-32	C	T	-0.000595101	0.000211865	0.0049721	C	T	-0.000274219	0.000151299	0.0699218
T1D	rs2847276	18	12777949	C	A	-0.134335	0.014833	1.35e-19	C	A	-0.000297294	0.000164136	0.070102	C	A	7.38294e-05	0.000117232	0.528844
T1D	rs142849366	18	12808743	C	T	0.24224	0.038679	3.78e-10	C	T	0.000821696	0.000450023	0.0678673	C	T	0.000779315	0.000323611	0.016033
T1D	rs62097857	18	12857759	A	G	0.243043	0.035134	4.6e-12	A	G	0.000345712	0.000401292	0.388965	A	G	6.53487e-05	0.000287233	0.820027
T1D	rs1808094	18	69858790	C	T	-0.113651	0.0149	2.4e-14	C	T	-0.000282943	0.000157527	0.0724724	C	T	-1.17339e-05	0.00011272	0.917092
T1D	rs67660661	18	69901081	T	G	0.100472	0.018296	3.99e-08	T	G	0.00024527	0.000199408	0.218702	T	G	0.000220726	0.000142063	0.120251
T1D	rs11085725	19	10351837	T	C	-0.12536	0.015845	2.54e-15	T	C	-3.73013e-05	0.000173088	0.829374	T	C	-5.21813e-05	0.000123668	0.673064
T1D	rs34536443	19	10352442	C	G	-0.385331	0.038519	1.47e-23	C	G	-0.000271372	0.000387337	0.483548	C	G	-0.00032253	0.000274401	0.239838
T1D	rs60652743	19	46702450	G	A	-0.165067	0.019381	1.64e-17	G	A	8.7433e-06	0.000211941	0.967094	G	A	-0.000472141	0.000151793	0.0018684
T1D	rs71353922	19	46708039	T	G	0.148832	0.025098	3.03e-09	T	G	0.000389997	0.000276521	0.158433	T	G	0.000375533	0.000197092	0.0567342
T1D	rs601338	19	48703417	A	G	0.127096	0.014419	1.2e-18	A	G	2.20447e-05	0.000157888	0.888959	A	G	0.000152413	0.000112774	0.176539
T1D	rs4490209	2	100150249	G	C	-0.084522	0.015457	4.55e-08	G	C	-9.84605e-05	0.000163895	0.548005	G	C	-6.75764e-05	0.000116782	0.562823
T1D	rs1881146	2	12494668	T	A	-0.09517	0.017407	4.57e-08	T	A	-0.00040416	0.000170627	0.0178533	T	A	-0.000216105	0.000121923	0.0763178
T1D	rs3764917	2	162173826	C	T	-0.108561	0.018554	4.89e-09	C	T	2.42508e-06	0.000196445	0.99015	C	T	-6.84643e-05	0.000140326	0.625625
T1D	rs2111485	2	162254026	G	A	0.127631	0.014455	1.05e-18	G	A	4.84985e-05	0.000160906	0.763103	G	A	-6.09797e-05	0.000114988	0.595895
T1D	rs78456138	2	162275836	T	C	-0.438266	0.05313	1.6e-16	T	C	-9.74161e-05	0.0005159	0.850228	T	C	0.000460683	0.000366053	0.208207
T1D	rs6434435	2	191089138	A	G	-0.122856	0.019089	1.23e-10	A	G	-0.000292063	0.000209797	0.163886	A	G	-0.000199616	0.000150097	0.183547
T1D	rs117701653	2	203764072	C	A	-0.21	0.035793	4.44e-09	C	A	-0.000117748	0.000392262	0.764044	C	A	-8.70567e-05	0.000279959	0.75583
T1D	rs231389	2	203770007	T	C	-0.096941	0.016567	4.87e-09	T	C	-3.384e-05	0.000187003	0.856399	T	C	-0.000158968	0.000133526	0.233838
T1D	rs112165453	2	203800092	T	C	0.301735	0.047897	2.98e-10	T	C	-0.00028421	0.000596979	0.634018	T	C	-0.000110768	0.000422954	0.793405
T1D	rs3087243	2	203874196	A	G	-0.19913	0.014202	1.16e-44	A	G	-3.12714e-05	0.000158022	0.843129	A	G	-0.000274914	0.000113016	0.0149953
T1D	rs62182626	2	203904534	T	C	-0.077541	0.014038	3.32e-08	T	C	-9.77849e-05	0.000157417	0.534479	T	C	5.59252e-05	0.000112662	0.619615
T1D	rs13018977	2	241338592	A	T	0.100335	0.017882	2.01e-08	A	T	0.000159777	0.000188273	0.396079	A	T	-4.92246e-05	0.000135013	0.715418
T1D	rs55893453	2	24916498	G	A	0.094653	0.01732	4.63e-08	G	A	0.000152474	0.000191836	0.426722	G	A	0.000219251	0.0001373	0.110295
T1D	rs12464462	2	60409281	G	A	-0.087955	0.014341	8.61e-10	G	A	-0.000468861	0.000159696	0.00332551	G	A	-4.52605e-05	0.000114087	0.691576
T1D	rs6043405	20	1634898	C	T	0.108016	0.014899	4.17e-13	C	T	0.000278572	0.000165386	0.0921116	C	T	0.000123982	0.000118059	0.293642
T1D	rs202535	20	1686343	A	C	-0.141437	0.018453	1.79e-14	A	C	-0.000113672	0.000215202	0.597355	A	C	-0.00026493	0.000153932	0.0852374
T1D	rs225313	21	42392245	T	A	-0.106267	0.016075	3.82e-11	T	A	-0.00011647	0.000173813	0.502804	T	A	-0.000321257	0.000124313	0.00975938
T1D	rs11203203	21	42416077	A	G	0.143803	0.014405	1.81e-23	A	G	0.000238833	0.000162985	0.142823	A	G	0.000338471	0.000116754	0.00374369
T1D	rs11909907	21	42436933	T	C	0.246037	0.034558	1.08e-12	T	C	0.0008268	0.000401662	0.0395489	T	C	0.000316598	0.000286099	0.268468
T1D	rs884340	21	42446428	T	C	-0.0878	0.014214	6.53e-10	T	C	-0.000257589	0.000158233	0.103546	T	C	-3.19544e-05	0.000113074	0.777485
T1D	rs74203920	21	44294411	T	C	0.313879	0.055717	1.77e-08	T	C	0.000698087	0.000659559	0.289868	T	C	-0.000507584	0.000473987	0.284225
T1D	rs4820827	22	30081600	C	T	-0.129657	0.014267	1.01e-19	C	T	0.000131409	0.000160893	0.414072	C	T	-0.000416104	0.000114779	0.000288746
T1D	rs228963	22	37139908	G	A	-0.086729	0.014291	1.29e-09	G	A	-3.49931e-05	0.000159603	0.826455	G	A	-0.000293393	0.000113906	0.0100033
T1D	rs229527	22	37185445	A	C	0.104077	0.014138	1.82e-13	A	C	2.83832e-05	0.00015906	0.858375	A	C	0.000240368	0.000113754	0.0345973
T1D	rs13147049	4	122272715	G	A	-0.109522	0.014689	8.92e-14	G	A	0.000168473	0.000167512	0.314542	G	A	-0.00010123	0.000119457	0.396763
T1D	rs2611211	4	165654287	T	C	-0.143854	0.018689	1.39e-14	T	C	-0.000422617	0.00021659	0.0510319	T	C	-9.31668e-05	0.000154441	0.546341
T1D	rs12644686	4	184381748	G	C	-0.10775	0.01932	2.44e-08	G	C	-0.000102855	0.00020654	0.618491	G	C	-0.00012051	0.00014825	0.416288
T1D	rs7668577	4	26121697	C	A	0.093652	0.015203	7.26e-10	C	A	0.000152685	0.000169903	0.368836	C	A	-4.18384e-05	0.000121125	0.729783
T1D	rs114378220	5	111230662	T	C	0.177902	0.030444	5.11e-09	T	C	0.00087647	0.000313267	0.00514526	T	C	0.000461015	0.000223334	0.038996
T1D	rs2188962	5	132435113	T	C	0.07946	0.014096	1.73e-08	T	C	0.000333963	0.000158787	0.0354487	T	C	6.9705e-05	0.000113637	0.539611
T1D	rs2303137	5	35895623	T	A	-0.081513	0.014025	6.17e-09	T	A	-9.70316e-05	0.000158727	0.540995	T	A	8.18283e-05	0.000113419	0.470621
T1D	rs9385401	6	126468326	T	C	0.12042	0.014827	4.59e-16	T	C	0.000308083	0.000157691	0.0507362	T	C	0.000123492	0.000112947	0.274235
T1D	rs4548024	6	137844607	C	T	-0.095737	0.016703	9.95e-09	C	T	-0.00021445	0.000186338	0.249788	C	T	-0.00020269	0.000133302	0.128378
T1D	rs113343204	6	25711083	G	A	0.506499	0.055208	4.54e-20	G	A	0.000395753	0.000654865	0.545627	G	A	0.000584056	0.000475635	0.219467
T1D	rs1165181	6	25825162	A	T	0.105965	0.01544	6.73e-12	A	T	-0.000203502	0.000172698	0.238653	A	T	-0.000127424	0.000123016	0.300281
T1D	rs75851425	6	25920383	C	G	0.500688	0.055242	1.26e-19	C	G	-0.000816332	0.000615061	0.184432	C	G	-0.00014871	0.000442114	0.736599
T1D	rs55855508	6	26222116	A	T	0.19091	0.034004	1.97e-08	A	T	0.000163635	0.00037871	0.66568	A	T	0.000556558	0.000272085	0.0408039
T1D	rs112252880	6	26260467	A	G	0.3446	0.062068	2.82e-08	A	G	-5.81261e-05	0.000744589	0.937777	A	G	0.000779566	0.000543531	0.151499
T1D	rs111568057	6	26376841	T	C	0.426885	0.04179	1.7e-24	T	C	0.0015598	0.000538166	0.00375173	T	C	0.000738044	0.000391278	0.0592643
T1D	rs7355	6	26393931	A	T	-0.125907	0.021384	3.91e-09	A	T	-0.000117189	0.000234739	0.617618	A	T	2.00911e-05	0.000167501	0.904526
T1D	rs6916321	6	26464561	G	A	-0.134694	0.017077	3.09e-15	G	A	7.43158e-05	0.00019266	0.699693	G	A	3.14658e-05	0.000137138	0.818522
T1D	rs9467788	6	26556893	G	C	0.314134	0.052553	2.27e-09	G	C	0.000571394	0.000629664	0.364166	G	C	-0.00029145	0.000440189	0.507906
T1D	rs74759001	6	27632506	A	G	-0.331007	0.050266	4.55e-11	A	G	-0.00114718	0.000544734	0.0352105	A	G	-0.000318969	0.000385031	0.407431
T1D	rs75739278	6	27691828	T	G	0.245471	0.029624	1.17e-16	T	G	-9.47096e-05	0.000330967	0.774756	T	G	-0.000179337	0.000238013	0.451164
T1D	rs17710827	6	28088472	T	G	0.222318	0.036204	8.21e-10	T	G	0.000113696	0.000393142	0.772431	T	G	0.000432119	0.000282376	0.125945
T1D	rs2622321	6	28149327	T	C	0.5458	0.040607	3.47e-41	T	C	0.000354252	0.000484338	0.464527	T	C	-0.000230998	0.000340062	0.496959
T1D	rs55968110	6	28511953	A	C	-0.310156	0.039078	2.07e-15	A	C	-0.000131586	0.000421524	0.754914	A	C	-0.000496911	0.000298879	0.0963978
T1D	rs911178	6	28606638	C	T	-0.229028	0.024232	3.34e-21	C	T	0.000313028	0.000285581	0.273032	C	T	-0.000247963	0.000202734	0.221295
T1D	rs111836343	6	28749185	A	G	-0.275655	0.029034	2.22e-21	A	G	-0.000175149	0.00029752	0.556065	A	G	-0.000554669	0.000212935	0.00919167
T1D	rs148907641	6	28763377	T	C	-0.652073	0.098383	3.41e-11	T	C	-0.000717703	0.000946427	0.448255	T	C	-0.000305158	0.000682686	0.654878
T1D	rs9257316	6	28881380	C	T	0.166539	0.018284	8.34e-20	C	T	0.000271726	0.000210844	0.197487	C	T	-4.04439e-05	0.000150428	0.788038
T1D	rs116174200	6	29377955	A	G	0.806301	0.05387	1.2e-50	A	G	-1.60134e-05	0.00069421	0.981597	A	G	0.00091503	0.00049295	0.0634217
T1D	rs238883	6	29378449	A	G	0.113082	0.015678	5.47e-13	A	G	0.000391809	0.000168381	0.0199704	A	G	0.000184961	0.000120254	0.124028
T1D	rs1005597	6	29506461	C	T	0.154804	0.014728	7.68e-26	C	T	0.000643176	0.000158081	4.73082e-05	C	T	0.000389206	0.000112817	0.000560907
T1D	rs3095270	6	29635359	A	C	0.135739	0.016706	4.47e-16	A	C	0.000550631	0.000168577	0.00108964	A	C	0.000329185	0.000120625	0.00635336
T1D	rs78914362	6	29658628	A	G	-0.341227	0.039231	3.38e-18	A	G	2.58385e-05	0.00040008	0.948506	A	G	-0.000264618	0.000285491	0.353986
T1D	rs430133	6	29683408	G	A	-0.237627	0.01609	2.33e-49	G	A	-0.000359661	0.00016849	0.0327939	G	A	-0.000136036	0.000120537	0.259078
T1D	rs138131857	6	29686321	A	G	-0.382712	0.058197	4.83e-11	A	G	-0.00129905	0.000593994	0.0287457	A	G	0.00019997	0.00042896	0.641091
T1D	rs1619379	6	29817458	T	C	-0.337681	0.016043	2.37e-98	T	C	-8.16889e-05	0.000159091	0.607622	T	C	-0.00013473	0.000113835	0.236592
T1D	rs9258550	6	29844099	G	A	-0.434629	0.026706	1.49e-59	G	A	-0.000741859	0.000266335	0.00534616	G	A	-0.000530959	0.000191548	0.0055729
T1D	rs17179234	6	29853563	A	C	0.360454	0.024845	1.07e-47	A	C	0.000245124	0.000298433	0.411435	A	C	4.77145e-05	0.000212365	0.822227
T1D	rs2517701	6	29958195	T	A	0.166153	0.015851	1.04e-25	T	A	0.000194543	0.000168539	0.248384	T	A	0.00010707	0.000120111	0.372705
T1D	rs113906032	6	29971405	G	C	0.330324	0.050665	7.04e-11	G	C	0.00123033	0.000631052	0.0512193	G	C	0.000862115	0.000451446	0.0561769
T1D	rs9261113	6	30009065	G	T	-0.330136	0.022885	3.55e-47	G	T	-0.000547951	0.000240906	0.0229344	G	T	-0.00034097	0.000172414	0.047973
T1D	rs2072109	6	30102498	G	C	-0.446715	0.026955	1.1e-61	G	C	-0.000611679	0.000268689	0.0228152	G	C	-0.000371438	0.000192354	0.0534832
T1D	rs59424499	6	30154656	A	G	-0.202096	0.034552	4.94e-09	A	G	-0.000128903	0.000332369	0.698141	A	G	4.57576e-05	0.000238195	0.847663
T1D	rs115084931	6	30169167	G	A	0.695641	0.044746	1.68e-54	G	A	0.000318653	0.000505452	0.528414	G	A	0.00117903	0.000358245	0.000998046
T1D	rs71561358	6	30183743	C	T	0.566983	0.03607	1.12e-55	C	T	0.00174975	0.00047633	0.000239416	C	T	0.000222126	0.000339714	0.513201
T1D	rs59979159	6	30233280	G	A	-0.426753	0.057516	1.17e-13	G	A	-0.0014123	0.000591463	0.0169507	G	A	-0.000202854	0.000424799	0.632986
T1D	rs75817914	6	30306162	T	C	-0.213081	0.03656	5.6e-09	T	C	-0.00108751	0.00038499	0.00473193	T	C	-0.000405823	0.000276349	0.141965
T1D	rs114188470	6	30390145	A	T	0.404242	0.035927	2.27e-29	A	T	0.000851503	0.000408729	0.0372258	A	T	0.000838989	0.000294347	0.00436767
T1D	rs56393452	6	30499343	A	C	-0.345774	0.047021	1.93e-13	A	C	3.32674e-05	0.000169034	0.843977	A	C	4.56458e-06	0.000120365	0.969749
T1D	rs148870239	6	30560882	G	A	0.304905	0.051588	3.41e-09	G	A	0.000368202	0.000625663	0.556198	G	A	0.000543192	0.000440418	0.217445
T1D	rs114423170	6	30563636	A	G	-0.240125	0.042165	1.23e-08	A	G	-0.000243213	0.00047147	0.605952	A	G	-0.000456853	0.000339205	0.178036
T1D	rs2027936	6	30642722	G	T	0.845633	0.041047	2.65e-94	G	T	0.00038209	0.00050134	0.445979	G	T	0.00103861	0.000354057	0.00335243
T1D	rs73422013	6	30680007	G	A	0.413679	0.04793	6.09e-18	G	A	-0.000288613	0.000609184	0.635664	G	A	0.000489231	0.000438639	0.264707
T1D	rs4947288	6	30728985	G	A	-0.411216	0.018355	3.62e-111	G	A	-0.000606532	0.000189628	0.00138153	G	A	-0.000453608	0.000135909	0.000845224
T1D	rs3094127	6	30729670	G	A	0.289496	0.019382	1.91e-50	G	A	0.000639004	0.000186694	0.000620077	G	A	0.000575067	0.000133824	1.73058e-05
T1D	rs190300559	6	30751005	G	A	-0.328065	0.044033	9.31e-14	G	A	-0.000412309	0.000475147	0.385533	G	A	0.000110448	0.000340656	0.745771
T1D	rs13197397	6	30787262	A	G	-0.202982	0.022232	6.83e-20	A	G	-0.000384469	0.000243939	0.115008	A	G	-0.00013016	0.000174315	0.455252
T1D	rs4713369	6	30793352	G	A	-0.361684	0.019655	1.27e-75	G	A	-0.000849253	0.000204754	3.36044e-05	G	A	-0.000312081	0.000146673	0.0333609
T1D	rs1264372	6	30801949	T	C	0.434774	0.017339	9.38e-139	T	C	0.00101744	0.000176332	7.94046e-09	T	C	0.000655425	0.000126496	2.20485e-07
T1D	rs3129989	6	30805745	C	T	0.173353	0.02027	1.21e-17	C	T	0.000486831	0.00019149	0.0110123	C	T	0.000421451	0.000136974	0.00209212
T1D	rs2517580	6	30842279	A	G	-0.188944	0.016977	9.05e-29	A	G	-0.000260943	0.000179383	0.145763	A	G	-0.00022049	0.000127783	0.0844382
T1D	rs111908057	6	30874976	G	T	-0.203452	0.037052	4e-08	G	T	-0.000696001	0.000433809	0.108629	G	T	0.000357008	0.000308494	0.247167
T1D	rs111846582	6	30934549	A	G	0.339061	0.040592	6.66e-17	A	G	0.000261189	0.000506308	0.605946	A	G	0.00048744	0.00036415	0.180712
T1D	rs115749638	6	30938138	T	C	0.634028	0.049139	4.34e-38	T	C	0.000475245	0.000673741	0.480574	T	C	0.00145499	0.000485608	0.0027338
T1D	rs13206144	6	30944605	A	G	-0.497659	0.059028	3.43e-17	A	G	-0.000887153	0.000647077	0.170372	A	G	-0.000604615	0.000461586	0.190244
T1D	rs3095150	6	30964755	T	C	0.231991	0.01564	8.92e-50	T	C	0.000374174	0.000163631	0.0222155	T	C	0.000448234	0.000117012	0.000127831
T1D	rs34767257	6	30964829	A	G	0.575423	0.025417	1.78e-113	A	G	0.00127099	0.000298917	2.12008e-05	A	G	0.000659273	0.000212583	0.00192736
T1D	rs56804692	6	30965719	C	T	0.671245	0.073864	1.01e-19	C	T	0.000467185	0.000885377	0.59773	C	T	0.000479234	0.000647677	0.459345
T1D	rs9262499	6	31019321	T	G	-0.114311	0.015168	4.83e-14	T	G	-0.00026734	0.000159588	0.0938993	T	G	0.000144678	0.000114037	0.204555
T1D	rs4713420	6	31025790	T	G	-0.310725	0.020584	1.73e-51	T	G	-0.000167894	0.000205228	0.413312	T	G	-0.000380485	0.000146179	0.00924548
T1D	rs12110481	6	31030535	T	G	0.119168	0.016341	3.04e-13	T	G	-0.000155373	0.000165877	0.348927	T	G	3.9705e-05	0.000118214	0.736966
T1D	rs115731696	6	31056985	G	A	0.356995	0.035163	3.22e-24	G	A	0.000969978	0.000432055	0.0247672	G	A	0.000681152	0.000307552	0.0267781
T1D	rs62399063	6	31069101	C	T	-0.555601	0.055288	9.26e-24	C	T	-0.000869248	0.000511234	0.0890774	C	T	-0.000399492	0.000366488	0.27569
T1D	rs3130977	6	31114212	C	T	0.286665	0.015859	4.96e-73	C	T	0.000622169	0.000163956	0.000147858	C	T	0.000523549	0.000116943	7.57541e-06
T1D	rs10947137	6	31127194	C	A	-0.326923	0.028512	1.95e-30	C	A	-0.000988266	0.000300083	0.000990352	C	A	-0.000259581	0.000214782	0.226828
T1D	rs2074478	6	31137856	T	C	0.344843	0.020958	7.82e-61	T	C	0.000713345	0.000198791	0.000332788	T	C	0.000642993	0.000142281	6.21165e-06
T1D	rs1419881	6	31162816	A	G	0.152595	0.015177	8.79e-24	A	G	0.000307811	0.000157251	0.0502966	A	G	0.00030912	0.000112343	0.00593132
T1D	rs10807081	6	31201987	T	G	0.477776	0.021816	2.61e-106	T	G	0.000668671	0.000274422	0.0148249	T	G	0.000440426	0.000195051	0.0239462
T1D	rs28362363	6	31202342	C	G	0.230828	0.021399	3.97e-27	C	G	4.94088e-06	0.000224067	0.982407	C	G	0.000138865	0.000160224	0.386111
T1D	rs35718543	6	31210068	A	G	-0.273424	0.027447	2.24e-23	A	G	0.000234461	0.000302039	0.437595	A	G	-0.000113782	0.000216418	0.599062
T1D	rs9264069	6	31232204	T	C	0.265153	0.028294	7.16e-21	T	C	0.000406366	0.000325691	0.212141	T	C	-0.000119045	0.000232631	0.608836
T1D	rs117292830	6	31250491	A	G	-0.316492	0.046459	9.61e-12	A	G	-0.00156212	0.000486098	0.00131114	A	G	-0.000186561	0.000349606	0.593597
T1D	rs2395471	6	31272915	A	G	-0.522124	0.016351	1e-200	A	G	-0.000701291	0.000165111	2.16388e-05	A	G	-0.000353134	0.000117759	0.00271096
T1D	rs3094691	6	31306916	A	G	-0.277246	0.015488	1.16e-71	A	G	-0.000517456	0.000159033	0.00113908	A	G	-0.000151421	0.000113568	0.182432
T1D	rs9265640	6	31332337	G	A	0.492483	0.015569	1e-200	G	A	0.00080162	0.00016099	6.38724e-07	G	A	0.000590663	0.00011538	3.07003e-07
T1D	rs12212594	6	31333042	C	T	-0.635226	0.031645	1.27e-89	C	T	-0.000511851	0.000304245	0.0925002	C	T	-0.000504475	0.000216575	0.0198428
T1D	rs6909636	6	31378822	A	G	0.237028	0.015262	2.14e-54	A	G	0.000134379	0.00016434	0.413537	A	G	0.000199469	0.000117483	0.0895373
T1D	rs3094600	6	31379367	A	G	0.313247	0.017457	5.36e-72	A	G	0.000500469	0.000176582	0.00459454	A	G	0.000587892	0.000126812	3.55561e-06
T1D	rs2523492	6	31379761	T	G	0.564103	0.0174	1e-200	T	G	0.00070707	0.000167147	2.33567e-05	T	G	0.000774369	0.000119137	8.06098e-11
T1D	rs9266790	6	31390673	A	T	-0.181887	0.021938	1.12e-16	A	T	-0.000530482	0.000228972	0.020516	A	T	-3.36709e-06	0.000163971	0.983617
T1D	rs118143045	6	31396103	G	A	-0.469061	0.041168	4.49e-30	G	A	-0.000270751	0.000455494	0.552237	G	A	-0.000558327	0.00032503	0.0858396
T1D	rs2596485	6	31397093	C	T	-0.272476	0.020686	1.27e-39	C	T	-0.000233804	0.000221013	0.290115	C	T	-3.63055e-05	0.00015805	0.818318
T1D	rs13220896	6	31401885	A	G	-0.546021	0.042577	1.2e-37	A	G	-0.00100298	0.000401684	0.0125276	A	G	-0.000430255	0.000288066	0.135282
T1D	rs9266806	6	31410245	C	T	0.240054	0.017057	5.5e-45	C	T	0.000541163	0.000198523	0.00641244	C	T	0.00018803	0.000141516	0.183955
T1D	rs3128980	6	31435060	A	G	0.185343	0.015232	4.61e-34	A	G	0.000401183	0.000159713	0.0120094	A	G	0.000370781	0.000114173	0.00116425
T1D	rs2284178	6	31464348	T	C	-0.394865	0.015018	2.3e-152	T	C	-0.00077107	0.000157353	9.57976e-07	T	C	-0.000280334	0.000112518	0.012723
T1D	rs2523679	6	31466557	T	C	0.711041	0.022941	1e-200	T	C	0.00142628	0.000293228	1.15102e-06	T	C	0.000906929	0.000208799	1.40273e-05
T1D	rs35163515	6	31467191	G	A	-0.456533	0.040415	1.37e-29	G	A	-0.00120251	0.00040238	0.00280397	G	A	-0.000411664	0.000287641	0.152383
T1D	rs14597	6	31472237	A	C	0.498736	0.0153	1e-200	A	C	0.000712552	0.000158161	6.63477e-06	A	C	0.000845668	0.000113097	7.61557e-14
T1D	rs12660382	6	31475546	T	C	-0.428799	0.020526	6.56e-97	T	C	-4.05701e-05	0.000212735	0.848755	T	C	-0.000524044	0.000151701	0.000551533
T1D	rs16899682	6	31475922	C	G	0.34055	0.042477	1.08e-15	C	G	0.000379709	0.000501871	0.449299	C	G	-0.000462569	0.000355625	0.193356
T1D	rs2855812	6	31504943	T	G	0.635332	0.017334	1e-200	T	G	0.00128761	0.000178731	5.86345e-13	T	G	0.000858919	0.0001282	2.09203e-11
T1D	rs2855814	6	31505265	C	T	-0.439931	0.02708	2.39e-59	C	T	-0.000448096	0.000253618	0.0772616	C	T	-0.000255831	0.000179995	0.155225
T1D	rs71563350	6	31538997	T	C	-0.478206	0.055487	6.79e-18	T	C	-0.00101831	0.000556043	0.0670488	T	C	-0.000320156	0.000400301	0.423834
T1D	rs13192469	6	31559079	C	T	-0.25538	0.038062	1.95e-11	C	T	-0.000976206	0.000443277	0.0276493	C	T	-0.000100959	0.000319796	0.752233
T1D	rs2256974	6	31587615	A	C	0.245645	0.018063	4.04e-42	A	C	-0.00014968	0.000207568	0.470843	A	C	0.000267574	0.00014797	0.0705612
T1D	rs11575840	6	31589863	T	C	-0.516287	0.065815	4.35e-15	T	C	-0.000892797	0.000604138	0.139462	T	C	0.000368488	0.000427798	0.389042
T1D	rs2471960	6	31612762	A	G	0.495113	0.015968	1e-200	A	G	0.000958245	0.000170134	1.78101e-08	A	G	0.000688995	0.000121238	1.3253e-08
T1D	rs2736173	6	31621958	T	C	1.16436	0.037317	1e-200	T	C	0.00319387	0.000526542	1.31615e-09	T	C	0.0021175	0.00037465	1.58879e-08
T1D	rs34137317	6	31637117	T	C	-1.10331	0.091642	2.21e-33	T	C	-0.00126866	0.000586573	0.0305557	T	C	-0.00111498	0.000416317	0.00740234
T1D	rs115247800	6	31639036	G	A	0.993319	0.042085	3.61e-123	G	A	0.0033334	0.000543385	8.562e-10	G	A	0.00209915	0.000389858	7.27747e-08
T1D	rs28366156	6	31703721	C	T	-0.679565	0.026776	4.2e-142	C	T	-0.000757034	0.000232624	0.00113687	C	T	-0.00057675	0.000166531	0.000533645
T1D	rs9267551	6	31730180	G	C	0.904805	0.029537	1e-200	G	C	0.00120319	0.000220797	5.06364e-08	G	C	0.00103539	0.00015799	5.63421e-11
T1D	rs1144709	6	31741572	T	C	0.310646	0.016994	1.21e-74	T	C	0.000345049	0.000199106	0.0830996	T	C	0.000279854	0.000141445	0.0478696
T1D	rs61036903	6	31746115	T	A	0.215118	0.024201	6.17e-19	T	A	2.26688e-05	0.000251054	0.928053	T	A	8.06611e-05	0.00017845	0.651262
T1D	rs909267	6	31778771	C	T	-0.475641	0.032134	1.43e-49	C	T	-0.000774385	0.000318243	0.0149624	C	T	-0.000485526	0.000228035	0.0332408
T1D	rs11576012	6	31827842	T	C	0.288177	0.04766	1.48e-09	T	C	0.00109356	0.000548309	0.0461073	T	C	0.000187835	0.000388325	0.628595
T1D	rs192741093	6	31873426	A	G	-0.740089	0.067531	6e-28	A	G	-0.000930247	0.000725264	0.199623	A	G	-0.000360553	0.000519359	0.487541
T1D	rs12661281	6	31874821	A	T	0.252	0.020271	1.76e-35	A	T	0.000565163	0.000237908	0.0175238	A	T	0.000425162	0.00017036	0.012573
T1D	rs115699278	6	31893055	T	C	-0.510528	0.082314	5.57e-10	T	C	3.54386e-05	0.00073812	0.961707	T	C	-0.000328206	0.000528542	0.534623
T1D	rs474534	6	31970330	G	A	0.620336	0.020837	9.25e-195	G	A	0.00130188	0.000246447	1.27522e-07	G	A	0.000961495	0.000176046	4.72409e-08
T1D	rs397948	6	32043937	G	A	-0.451981	0.016225	9e-171	G	A	-0.000520642	0.000164208	0.00152136	G	A	-0.000504133	0.000117411	1.75771e-05
T1D	rs62402722	6	32124313	C	A	-0.690105	0.051614	8.98e-41	C	A	-0.000900575	0.000430726	0.0365447	C	A	-0.0009044	0.000306634	0.00318382
T1D	rs35580488	6	32129644	C	G	-0.696609	0.07801	4.27e-19	C	G	-0.000475328	0.000688697	0.490079	C	G	-0.000837673	0.000494136	0.0900339
T1D	rs205002	6	32145535	A	G	0.187418	0.015354	2.86e-34	A	G	0.000198796	0.000167782	0.236079	A	G	0.000172779	0.000119666	0.148783
T1D	rs9267812	6	32160617	T	C	0.140535	0.020132	2.93e-12	T	C	0.000178877	0.000229967	0.436665	T	C	6.60218e-05	0.000164889	0.688862
T1D	rs116519179	6	32191965	A	G	-0.945733	0.07449	6.21e-37	A	G	-0.00158861	0.000674127	0.0184472	A	G	-0.000954972	0.00048728	0.0500203
T1D	rs28986321	6	32203203	A	C	-0.937463	0.069148	7.18e-42	A	C	-0.00096372	0.000614058	0.11655	A	C	-0.000786961	0.000436783	0.071591
T1D	rs56125791	6	32206966	G	C	1.2511	0.033605	1e-200	G	C	0.00247142	0.000414793	2.55547e-09	G	C	0.00175893	0.000296136	2.86201e-09
T1D	rs3134932	6	32218370	A	C	0.42664	0.015271	9.03e-172	A	C	0.000493743	0.000161858	0.00228518	A	C	0.00054711	0.000115603	2.2173e-06
T1D	rs3134931	6	32222843	C	T	-0.222396	0.016266	1.49e-42	C	T	-0.000489456	0.000170877	0.00417886	C	T	-0.000362608	0.000122361	0.00304277
T1D	rs434841	6	32223264	A	G	0.585506	0.016146	1e-200	A	G	0.00102541	0.000171109	2.06769e-09	A	G	0.000803726	0.000122605	5.56195e-11
T1D	rs396960	6	32223804	A	T	-0.629482	0.019417	1e-200	A	T	-0.000424203	0.00018255	0.0201394	A	T	-0.000681582	0.000130519	1.771e-07
T1D	rs114011376	6	32227947	A	G	-0.887132	0.086827	1.66e-24	A	G	-0.00111267	0.00079738	0.162897	A	G	-0.000292325	0.000563434	0.603881
T1D	rs409687	6	32227973	T	C	0.212419	0.018628	4.03e-30	T	C	0.000638153	0.000214421	0.00291919	T	C	0.000324719	0.000153221	0.0340675
T1D	rs9267866	6	32230552	T	C	1.59632	0.051157	1e-200	T	C	0.00363863	0.000664483	4.35949e-08	T	C	0.00294015	0.000470379	4.09726e-10
T1D	rs419132	6	32243022	G	A	-0.212907	0.018012	3.08e-32	G	A	-0.000341032	0.000194137	0.0789782	G	A	-8.58408e-05	0.000138631	0.535783
T1D	rs149094175	6	32243461	C	G	0.860633	0.0281	1e-200	C	G	0.00142188	0.000361593	8.41888e-05	C	G	0.000902913	0.000256957	0.000441722
T1D	rs9268000	6	32255754	C	A	0.526488	0.015504	1e-200	C	A	0.000433918	0.000165185	0.00861858	C	A	0.000627101	0.000117828	1.02652e-07
T1D	rs56118007	6	32261826	C	T	-0.762259	0.071362	1.24e-26	C	T	-0.000435386	0.000708954	0.539133	C	T	-0.00078755	0.000505595	0.119313
T1D	rs114543649	6	32293381	C	G	-0.621012	0.067603	4.07e-20	C	G	-0.000612095	0.000666808	0.358648	C	G	-0.000702297	0.000482905	0.14586
T1D	rs114355928	6	32298104	T	G	1.13191	0.034586	1e-200	T	G	0.00334683	0.000464983	6.14691e-13	T	G	0.00197051	0.000335259	4.16989e-09
T1D	rs116839050	6	32330047	T	C	-0.588163	0.075316	5.75e-15	T	C	-0.000408088	0.000947885	0.666815	T	C	6.85608e-06	0.00068349	0.991997
T1D	rs1265764	6	32345882	A	G	0.812188	0.037568	1.18e-103	A	G	0.000872567	0.000368498	0.0178902	A	G	0.000866996	0.000262571	0.000960316
T1D	rs7763192	6	32371108	G	C	-0.130397	0.022802	1.07e-08	G	C	-0.000152201	0.000250299	0.543138	G	C	-0.000213694	0.000178608	0.231525
T1D	rs2073045	6	32371771	A	G	0.815508	0.016207	1e-200	A	G	0.00131324	0.000169245	8.58252e-15	A	G	0.00105387	0.000120873	2.83335e-18
T1D	rs2050189	6	32371870	C	T	0.275616	0.018574	8.19e-50	C	T	0.00048154	0.00018641	0.00978898	C	T	0.000406205	0.000133343	0.002317
T1D	rs3763317	6	32409011	T	C	0.483873	0.015584	1e-200	T	C	0.000561373	0.000158059	0.000382904	T	C	0.00048447	0.000112721	1.72458e-05
T1D	rs28732209	6	32421766	C	A	-1.21809	0.043386	1.94e-173	C	A	-0.000600759	0.000322064	0.0621352	C	A	-0.000825318	0.000229753	0.000327988
T1D	rs9501630	6	32448655	T	G	-0.939992	0.08286	7.91e-30	T	G	-0.000881926	0.000632207	0.163019	T	G	-0.000173399	0.000462197	0.70754
T1D	rs9268820	6	32457620	A	C	0.606565	0.016742	1e-200	A	C	0.000584336	0.000163458	0.000350549	A	C	0.000443148	0.000116956	0.000151297
T1D	rs148242149	6	32458242	T	C	-0.725017	0.066962	2.56e-27	T	C	-0.000518586	0.000686801	0.450205	T	C	-0.000262166	0.000484128	0.588148
T1D	rs73399211	6	32464687	T	G	-1.01011	0.065441	9.46e-54	T	G	-0.00139124	0.000585029	0.017405	T	G	-0.00019575	0.000420384	0.64147
T1D	rs78218185	6	32464723	A	G	0.584862	0.050678	8.22e-31	A	G	0.00249087	0.000708494	0.000438665	A	G	6.35414e-05	0.000502254	0.899326
T1D	rs41291802	6	32465869	T	C	-1.1805	0.035757	1e-200	T	C	-0.00100885	0.000282298	0.000352054	T	C	-0.000257973	0.000201995	0.201559
T1D	rs4367411	6	32604152	T	C	1.03619	0.03393	1e-200	T	C	-0.00067139	0.00020419	0.00100898	T	C	-0.000614106	0.000144975	2.2771e-05
T1D	rs542778942	6	32617975	C	T	-1.27632	0.116903	9.48e-28	C	T	-0.000178927	0.00101172	0.859623	C	T	-0.000545176	0.000724278	0.451621
T1D	rs71542419	6	32620058	A	C	-1.39881	0.041109	1e-200	A	C	-0.00104975	0.000289582	0.00028899	A	C	-0.000676128	0.000207213	0.00110275
T1D	rs560607175	6	32625539	A	C	-0.603803	0.029376	7.04e-94	A	C	-0.000778161	0.000387498	0.0446271	A	C	-0.000475994	0.000276986	0.0857116
T1D	rs9272958	6	32643393	A	C	1.1054	0.019133	1e-200	A	C	0.00140245	0.000161329	3.55728e-18	A	C	0.00105568	0.000115461	6.12004e-20
T1D	rs7757696	6	32643673	T	G	1.10545	0.019136	1e-200	T	G	0.00140115	0.000161319	3.80154e-18	T	G	0.00105538	0.000115455	6.23974e-20
T1D	rs28468461	6	32655240	C	T	-1.07414	0.056988	3.02e-79	C	T	-0.000949876	0.000461068	0.0393845	C	T	-0.000789877	0.000332058	0.0173732
T1D	rs4713575	6	32659262	G	A	0.80368	0.043246	4.34e-77	G	A	0.00143589	0.000162158	8.45828e-19	G	A	0.0011756	0.000115988	3.89563e-24
T1D	rs9273401	6	32659352	G	A	1.73701	0.048297	1e-200	G	A	0.00332241	0.000256307	2.07998e-38	G	A	0.00254866	0.000184351	1.88841e-43
T1D	rs9275036	6	32677542	C	T	0.844658	0.050016	5.54e-64	C	T	0.00151111	0.000174076	3.96668e-18	C	T	0.00125022	0.000124526	1.03228e-23
T1D	rs28746894	6	32680396	T	C	-0.918366	0.020214	1e-200	T	C	-0.000684332	0.000188452	0.000282038	T	C	-0.000561224	0.000135124	3.27723e-05
T1D	rs9275601	6	32714887	T	C	0.423157	0.015563	8.49e-163	T	C	0.000507479	0.000158886	0.00140352	T	C	0.000438792	0.000113424	0.0001095
T1D	rs3104408	6	32715335	A	G	-0.159659	0.015078	3.37e-26	A	G	-0.000270048	0.000163382	0.0983611	A	G	-6.40913e-05	0.000116969	0.583737
T1D	rs9391746	6	32715903	T	G	-0.751799	0.034859	3.7e-103	T	G	-0.000231997	0.000341311	0.496681	T	G	-0.00035202	0.000245678	0.151902
T1D	rs73734325	6	32717521	A	T	-0.985856	0.061859	3.5e-57	A	T	-0.000776952	0.000524719	0.138688	A	T	-0.000794045	0.000372654	0.0331082
T1D	rs9275653	6	32718088	A	G	-0.46298	0.015156	1e-200	A	G	-0.000338047	0.000160572	0.0352692	A	G	4.04776e-05	0.000114637	0.724019
T1D	rs9275710	6	32720443	G	T	-0.627116	0.015206	1e-200	G	T	-0.000824451	0.000158065	1.8316e-07	G	T	-0.00049954	0.000113229	1.0258e-05
T1D	rs12664812	6	32733140	G	A	0.833659	0.063308	1.33e-39	G	A	0.00144965	0.000827039	0.0796358	G	A	0.00108302	0.000589334	0.0661069
T1D	rs114920411	6	32755531	A	G	-0.924289	0.047554	3.79e-84	A	G	-0.000972927	0.000412541	0.0183563	A	G	-0.000512893	0.000299085	0.0863703
T1D	rs78631708	6	32758371	A	C	-1.03559	0.077062	3.6e-41	A	C	-0.000925618	0.000647528	0.152873	A	C	-0.000420217	0.000469412	0.370682
T1D	rs115795061	6	32764084	A	T	-0.620142	0.083395	1.04e-13	A	T	-0.00121313	0.000778462	0.119147	A	T	4.42111e-05	0.00055921	0.936985
T1D	rs9276726	6	32796111	C	T	0.472267	0.015288	1e-200	C	T	0.000754652	0.000169328	8.32675e-06	C	T	0.000829255	0.000120967	7.14232e-12
T1D	rs16870880	6	32814241	T	C	-0.451451	0.029105	2.93e-54	T	C	-0.000666393	0.000297391	0.0250404	T	C	-0.000304982	0.00021332	0.152807
T1D	rs55888430	6	32817365	A	G	1.48308	0.031423	1e-200	A	G	0.00342465	0.000450418	2.90236e-14	A	G	0.0026403	0.000321244	2.06515e-16
T1D	rs9368744	6	32830522	T	C	0.570229	0.047144	1.12e-33	T	C	0.00102313	0.000605542	0.0911036	T	C	0.00125171	0.000437685	0.00423916
T1D	rs1015166	6	32830954	T	C	0.626348	0.015039	1e-200	T	C	0.000934239	0.000166159	1.88437e-08	T	C	0.000777562	0.000118778	5.91062e-11
T1D	rs1800454	6	32832635	T	C	-0.469037	0.022324	5.23e-98	T	C	-0.000622479	0.000225917	0.00586366	T	C	-9.81668e-05	0.000161673	0.543722
T1D	rs3819720	6	32836793	A	G	0.688516	0.015247	1e-200	A	G	0.00107383	0.000163495	5.11546e-11	A	G	0.00090484	0.000117127	1.12136e-14
T1D	rs17583244	6	32836910	C	T	-0.807397	0.037799	3.14e-101	C	T	-0.000699862	0.000321211	0.029346	C	T	-0.00115263	0.000228878	4.75704e-07
T1D	rs9357155	6	32842071	A	G	0.620339	0.020114	1e-200	A	G	0.000815771	0.000241403	0.000726905	A	G	0.000554923	0.000172473	0.00129354
T1D	rs114311872	6	32844959	T	C	-0.276589	0.042105	5.06e-11	T	C	3.3153e-05	0.00046036	0.94259	T	C	-9.65742e-05	0.00032812	0.768509
T1D	rs113215190	6	32845024	A	G	-0.303767	0.03326	6.65e-20	A	G	-0.000409187	0.000356048	0.250456	A	G	-0.000294381	0.000253749	0.245998
T1D	rs113206908	6	32850253	C	T	1.1435	0.036597	1e-200	C	T	0.00285102	0.000503999	1.54478e-08	C	T	0.00278911	0.000360922	1.0999e-14
T1D	rs2071538	6	32850901	A	G	-0.511184	0.019004	2.31e-159	A	G	-0.000519198	0.000188445	0.0058668	A	G	-0.000378251	0.000134466	0.00490875
T1D	rs20547	6	32858456	G	A	-0.605035	0.046891	4.34e-38	G	A	0.000199898	0.000488156	0.682176	G	A	-0.000688311	0.000340197	0.0430461
T1D	rs9276831	6	32864256	G	A	-0.486882	0.025747	9.34e-80	G	A	-0.000756346	0.00025884	0.00347769	G	A	-0.000352417	0.000185729	0.0577655
T1D	rs56297443	6	32864260	C	T	-0.573515	0.073694	7.12e-15	C	T	-0.00111278	0.000647364	0.0856278	C	T	-0.000923053	0.000465329	0.0472958
T1D	rs2244458	6	32885727	C	T	0.511645	0.016237	1e-200	C	T	0.000637181	0.000165608	0.000119366	C	T	0.000667166	0.000118401	1.75493e-08
T1D	rs144112342	6	32890300	C	T	-0.768523	0.057472	8.79e-41	C	T	-0.000465458	0.000515307	0.366387	C	T	-0.000706506	0.000366591	0.0539521
T1D	rs138826033	6	32925384	A	G	0.376178	0.062476	1.73e-09	A	G	-0.000968729	0.000808475	0.230834	A	G	0.000595618	0.000585394	0.308934
T1D	rs1965748	6	32933195	G	C	0.195597	0.02008	2.02e-22	G	C	0.000340026	0.000231256	0.141471	G	C	3.64987e-05	0.000165159	0.825099
T1D	rs187764	6	32934337	T	C	-0.543583	0.036256	8.17e-51	T	C	-0.000131017	0.000316056	0.678481	T	C	-0.000136012	0.000224465	0.544557
T1D	rs115460679	6	32969254	T	C	-0.437551	0.064449	1.13e-11	T	C	-0.00116016	0.000686329	0.0909573	T	C	-0.000598685	0.000496013	0.227436
T1D	rs79643712	6	32971134	T	C	-0.384165	0.028938	3.21e-40	T	C	-0.00085587	0.000301218	0.00449264	T	C	-0.00032977	0.00021379	0.122955
T1D	rs190237002	6	32972044	A	G	-0.389545	0.055244	1.77e-12	A	G	-0.000117729	0.000590489	0.84197	A	G	-0.000685358	0.000419171	0.102044
T1D	rs485502	6	32975568	T	C	0.445325	0.014529	1e-200	T	C	0.000751678	0.000156993	1.6861e-06	T	C	0.000746809	0.000111974	2.57374e-11
T1D	rs3097644	6	32977753	C	G	0.498397	0.028881	9.91e-67	C	G	0.000809706	0.000263875	0.0021516	C	G	0.000532668	0.00018768	0.00453782
T1D	rs11757367	6	32995105	A	G	0.210813	0.019671	8.48e-27	A	G	0.000549328	0.000209737	0.0088164	A	G	0.00039315	0.000150501	0.00899493
T1D	rs9276966	6	32997971	G	A	0.647819	0.045954	3.96e-45	G	A	0.00179415	0.000552361	0.00116179	G	A	0.000380494	0.000391857	0.331549
T1D	rs176248	6	32998165	A	G	0.166938	0.016075	2.9e-25	A	G	0.000423491	0.000172633	0.0141631	A	G	0.000217815	0.00012314	0.0769219
T1D	rs13205975	6	33003088	A	G	-0.498849	0.036715	4.78e-42	A	G	-0.00127837	0.000360536	0.000391605	A	G	-0.000255222	0.000258324	0.323159
T1D	rs3128936	6	33005486	T	A	0.361135	0.014819	3.59e-131	T	A	0.000477551	0.000159917	0.0028246	T	A	0.000534067	0.000114143	2.8859e-06
T1D	rs2581	6	33006624	T	G	0.264614	0.014117	2.14e-78	T	G	0.000289715	0.000158096	0.0668747	T	G	0.000312265	0.00011287	0.00566511
T1D	rs432375	6	33011902	C	G	0.304013	0.026263	5.47e-31	C	G	0.00100001	0.000291575	0.000604417	C	G	0.000498078	0.000207613	0.0164376
T1D	rs7774158	6	33039975	A	C	-0.247934	0.015155	3.71e-60	A	C	-0.000365378	0.000165554	0.0273152	A	C	-0.000286225	0.000118109	0.0153767
T1D	rs419121	6	33041575	T	A	-0.412271	0.053681	1.59e-14	T	A	-0.000793346	0.000523457	0.129625	T	A	-0.000120198	0.00037331	0.747468
T1D	rs449635	6	33056389	G	A	-0.460646	0.029676	2.44e-54	G	A	-0.000821159	0.000311148	0.0083129	G	A	-0.00029623	0.00022322	0.184485
T1D	rs396638	6	33056452	A	G	0.200051	0.015268	3.17e-39	A	G	0.000397653	0.000170197	0.01947	A	G	0.000300439	0.000121627	0.0135059
T1D	rs376877	6	33056829	G	C	0.306401	0.017699	3.86e-67	G	C	0.00055187	0.000204492	0.00696107	G	C	0.000230276	0.000146381	0.115691
T1D	rs1042174	6	33069849	G	C	-0.417793	0.024093	2.32e-67	G	C	-0.000322385	0.000240435	0.179974	G	C	-0.000261898	0.000171792	0.127384
T1D	rs115244420	6	33077958	T	C	0.582261	0.061345	2.28e-21	T	C	0.00121396	0.000894584	0.174781	T	C	0.00034943	0.000631693	0.580151
T1D	rs28986428	6	33082576	T	C	-0.786603	0.073863	1.75e-26	T	C	9.7748e-05	0.000611043	0.872906	T	C	0.000260941	0.0004379	0.551249
T1D	rs3128928	6	33106835	A	C	0.283296	0.015931	9.69e-71	A	C	0.000391512	0.000183656	0.0330276	A	C	0.000343923	0.000131422	0.00887278
T1D	rs17221401	6	33126336	A	G	-0.30449	0.022463	7.41e-42	A	G	-0.000366484	0.000239155	0.125422	A	G	-0.000559118	0.000169988	0.00100507
T1D	rs3117006	6	33128931	A	G	0.197477	0.014786	1.1e-40	A	G	0.000208212	0.000169143	0.218331	A	G	0.000193402	0.000120767	0.109279
T1D	rs41288897	6	33131559	A	T	-0.522335	0.019196	4.83e-163	A	T	-0.000348534	0.000192275	0.0698827	A	T	-0.000366517	0.000137499	0.00768565
T1D	rs3903051	6	33148933	G	A	-0.191546	0.015365	1.14e-35	G	A	-1.68627e-05	0.000162981	0.917595	G	A	-4.27099e-05	0.000116716	0.714418
T1D	rs2235499	6	33162187	T	G	-0.589656	0.065231	1.57e-19	T	G	-0.0015011	0.000583647	0.0101144	T	G	-3.53696e-06	0.000417312	0.993238
T1D	rs61736933	6	33210005	T	C	-0.534358	0.07622	2.37e-12	T	C	0.000693103	0.000693846	0.31783	T	C	-0.000427878	0.000501599	0.393645
T1D	rs9277949	6	33230483	A	G	0.331228	0.017722	5.98e-78	A	G	0.00029143	0.000204986	0.155115	A	G	0.000557079	0.000146014	0.000136091
T1D	rs116809959	6	33237860	T	A	0.617243	0.077529	1.7e-15	T	A	0.000598832	0.000905104	0.508218	T	A	0.00082895	0.000655217	0.205818
T1D	rs115100599	6	33255411	A	G	-0.234926	0.041098	1.09e-08	A	G	-0.000308807	0.000404334	0.445021	A	G	0.000310466	0.000290032	0.284416
T1D	rs2073524	6	33322770	A	T	0.239384	0.014951	1.08e-57	A	T	0.000217508	0.000157061	0.166097	A	T	0.000283213	0.000112311	0.01168
T1D	rs116362778	6	33330931	T	C	-0.364717	0.044259	1.71e-16	T	C	0.000133884	0.000422318	0.751228	T	C	-0.000802887	0.000302929	0.0080399
T1D	rs145494894	6	33359045	A	G	0.230234	0.038142	1.58e-09	A	G	-0.000316383	0.000448926	0.480963	A	G	0.000581659	0.000320505	0.0695532
T1D	rs114965683	6	33364458	A	G	-0.394269	0.068323	7.9e-09	A	G	-0.000423873	0.000630174	0.501185	A	G	-0.0011188	0.000454395	0.0138109
T1D	rs114972028	6	33383674	T	A	-0.363179	0.034461	5.73e-26	T	A	-0.000754911	0.000347618	0.0298822	T	A	-0.000218064	0.000247076	0.377464
T1D	rs9278048	6	33405647	T	C	0.466027	0.044181	5.19e-26	T	C	0.00232737	0.000551345	2.43067e-05	T	C	0.000629006	0.000390555	0.107281
T1D	rs116323349	6	33433514	A	C	0.240029	0.034005	1.68e-12	A	C	0.000399602	0.000391009	0.306794	A	C	0.000641161	0.000278562	0.0213542
T1D	rs12526020	6	33499307	A	C	-0.466007	0.038655	1.81e-33	A	C	-0.0003353	0.000372896	0.368559	A	C	-0.000401172	0.000264936	0.129971
T1D	rs86715	6	33512658	G	A	-0.17135	0.023117	1.24e-13	G	A	-5.39201e-05	0.000241071	0.823015	G	A	-0.000275819	0.000172122	0.109055
T1D	rs115903052	6	33535842	A	G	-0.292776	0.05284	3.01e-08	A	G	-0.00109366	0.000545818	0.0451031	A	G	-0.000373204	0.000388244	0.336421
T1D	rs210155	6	33549254	T	C	-0.109654	0.015611	2.15e-12	T	C	-9.76029e-05	0.000166118	0.556834	T	C	-9.11571e-05	0.000119104	0.444058
T1D	rs116078841	6	33556992	G	A	-0.482677	0.076249	2.45e-10	G	A	-0.00175528	0.000795187	0.0272891	G	A	-0.000256761	0.000567823	0.651137
T1D	rs2284828	6	33580716	T	C	0.085146	0.014928	1.17e-08	T	C	0.000209723	0.00016753	0.210626	T	C	6.07845e-05	0.000120213	0.613111
T1D	rs396746	6	33589268	C	A	0.255598	0.021713	5.46e-32	C	A	0.000429335	0.000227131	0.0587259	C	A	0.000300489	0.000162178	0.0639068
T1D	rs210215	6	33605447	A	C	0.226941	0.014137	5.4e-58	A	C	0.00042576	0.000159126	0.00746003	A	C	0.000280019	0.000113815	0.0138827
T1D	rs16869280	6	33607618	T	C	-0.176719	0.023696	8.79e-14	T	C	-0.000348438	0.000251449	0.165835	T	C	-0.000275805	0.00018018	0.125839
T1D	rs139460992	6	33627713	C	T	0.21617	0.036287	2.57e-09	C	T	-7.62184e-06	0.000402448	0.98489	C	T	-0.000187834	0.000288231	0.51461
T1D	rs150273297	6	33639326	A	T	-0.150747	0.018858	1.31e-15	A	T	-5.06096e-05	0.000201902	0.802074	A	T	-0.000501081	0.000144042	0.00050396
T1D	rs2281916	6	33687396	C	T	-0.08693	0.015288	1.3e-08	C	T	0.00044459	0.000170386	0.00907319	C	T	-9.714e-05	0.000121828	0.425246
T1D	rs767895	6	33823686	G	C	0.192408	0.015746	2.45e-34	G	C	9.79565e-05	0.000177934	0.581962	G	C	0.000297519	0.000126843	0.0189991
T1D	rs79681478	6	33825134	T	A	0.333836	0.035446	4.59e-21	T	A	0.00076986	0.000404554	0.0570439	T	A	0.000305178	0.000289064	0.291085
T1D	rs1122554	6	33830813	G	A	-0.117748	0.014325	2.04e-16	G	A	-0.000286043	0.000161151	0.075899	G	A	-0.000114294	0.000115148	0.320913
T1D	rs9296099	6	33853345	A	G	0.119804	0.015748	2.8e-14	A	G	1.29219e-05	0.000176882	0.941763	A	G	0.000150382	0.000126571	0.234784
T1D	rs78098413	6	33867974	G	A	-0.100298	0.01648	1.16e-09	G	A	-0.000191449	0.00017706	0.279581	G	A	-0.000238977	0.000126359	0.0585915
T1D	rs2274154	6	33889748	T	C	0.218635	0.021174	5.39e-25	T	C	0.000585069	0.000248539	0.0185721	T	C	0.000504518	0.000177601	0.00450136
T1D	rs6903171	6	33896360	C	G	0.239823	0.020738	6.26e-31	C	G	0.000172003	0.000228554	0.45171	C	G	0.000207823	0.000162191	0.200072
T1D	rs12215482	6	33902222	G	A	-0.096166	0.016453	5.07e-09	G	A	-7.11868e-05	0.000170067	0.675522	G	A	-0.000303311	0.000121653	0.012659
T1D	rs4713719	6	33904784	A	G	0.089857	0.01625	3.21e-08	A	G	0.000169329	0.00017566	0.33507	A	G	0.00013309	0.000125204	0.28779
T1D	rs62399264	6	33910896	T	C	0.28427	0.035153	6.14e-16	T	C	0.000482604	0.00038452	0.209451	T	C	0.000478517	0.000274849	0.0816823
T1D	rs1050979	6	410417	G	A	0.106196	0.014129	5.65e-14	G	A	0.000176873	0.000157867	0.262548	G	A	0.000163042	0.000112888	0.148663
T1D	rs60649859	6	90144814	T	A	-0.186437	0.030218	6.84e-10	T	A	-7.04984e-05	0.000323546	0.827513	T	A	-0.000508469	0.000232036	0.0284289
T1D	rs6908626	6	90296024	T	G	0.202923	0.01852	6.14e-28	T	G	0.000210888	0.000206036	0.30605	T	G	0.00054445	0.000147062	0.000213816
T1D	rs7795896	7	117446559	T	C	-0.135435	0.016416	1.58e-16	T	C	2.09608e-05	0.000172679	0.903386	T	C	-0.000155649	0.000123155	0.206286
T1D	rs7805218	7	20339178	A	G	0.095414	0.01658	8.67e-09	A	G	8.81718e-05	0.000170282	0.604599	A	G	6.26071e-05	0.000121918	0.607589
T1D	rs17323934	7	26864711	G	C	-0.129663	0.016818	1.26e-14	G	C	-3.51026e-05	0.000185904	0.850234	G	C	3.21107e-05	0.0001328	0.808937
T1D	rs213530	7	26880695	G	T	-0.078599	0.013992	1.94e-08	G	T	-0.000148711	0.000158584	0.348375	G	T	-2.39247e-05	0.000113071	0.832427
T1D	rs876039	7	50269215	C	G	-0.083811	0.015105	2.88e-08	C	G	-0.000238997	0.00016932	0.158096	C	G	-9.01975e-05	0.000121063	0.456246
T1D	rs10262731	7	50392217	A	G	-0.127769	0.022425	1.21e-08	A	G	0.000402322	0.000245457	0.101199	A	G	2.74625e-05	0.000175403	0.875586
T1D	rs7776597	7	50947885	G	A	0.244413	0.036372	1.82e-11	G	A	0.0005435	0.000378518	0.151042	G	A	0.00024411	0.000268604	0.363451
T1D	rs13259300	8	119070702	C	A	-0.092191	0.014669	3.28e-10	C	A	-0.000109271	0.000162424	0.501107	C	A	-3.48596e-05	0.000116163	0.764107
T1D	rs3802214	8	140606084	C	T	-0.106609	0.01923	2.96e-08	C	T	-8.37921e-06	0.000203789	0.967203	C	T	8.09511e-06	0.000145958	0.95577
T1D	rs1947178	8	58959618	G	A	-0.103267	0.017134	1.67e-09	G	A	-0.000181716	0.000189733	0.338193	G	A	2.36338e-05	0.000135888	0.861928
T1D	rs1574285	9	4283137	T	G	-0.126548	0.014171	4.27e-19	T	G	-0.000566357	0.000160928	0.000432786	T	G	-0.00021747	0.000114892	0.0583822
T1D	rs3132136	6	32886210	A	G	0.334622	0.047077	1.18e-12	NA	NA	NA	NA	NA	NA	NA	NA	NA	NA
T1D	rs148347131	6	32997567	T	C	0.532078	0.051368	3.84e-25	NA	NA	NA	NA	NA	NA	NA	NA	NA	NA
T1D	rs773126	12	56001636	A	T	0.098378	0.015521	2.32e-10	NA	NA	NA	NA	NA	NA	NA	NA	NA	NA
T1D	rs560791209	6	32505123	A	C	1.9175	0.186282	7.54e-25	NA	NA	NA	NA	NA	NA	NA	NA	NA	NA
T1D	rs149033708	6	32746314	G	A	1.16491	0.140995	1.43e-16	NA	NA	NA	NA	NA	NA	NA	NA	NA	NA
T1D	rs12530114	6	30107014	T	C	0.168546	0.015147	9.25e-29	NA	NA	NA	NA	NA	NA	NA	NA	NA	NA
T1D	rs115337486	6	33387741	T	C	1.03022	0.037487	2.9e-166	NA	NA	NA	NA	NA	NA	NA	NA	NA	NA
T1D	rs201125976	6	32589733	A	G	0.7724	0.109801	2e-12	NA	NA	NA	NA	NA	NA	NA	NA	NA	NA
T1D	rs565574629	6	32518767	A	C	2.03645	0.295976	5.97e-12	NA	NA	NA	NA	NA	NA	NA	NA	NA	NA
T1D	rs112847791	6	32492952	G	C	1.21726	0.192133	2.37e-10	NA	NA	NA	NA	NA	NA	NA	NA	NA	NA
T1D	rs34958200	6	32579157	A	C	1.84618	0.109433	7.42e-64	NA	NA	NA	NA	NA	NA	NA	NA	NA	NA
T1D	rs111233437	6	32519126	G	T	0.818632	0.095935	1.42e-17	NA	NA	NA	NA	NA	NA	NA	NA	NA	NA
T1D	rs574264514	6	32579695	C	A	0.733616	0.047559	1.1e-53	NA	NA	NA	NA	NA	NA	NA	NA	NA	NA
T1D	rs28362365	6	32613905	C	A	-0.18801	0.017446	4.45e-27	NA	NA	NA	NA	NA	NA	NA	NA	NA	NA
T1D	rs574642751	6	32558060	T	A	0.634868	0.069441	6.1e-20	NA	NA	NA	NA	NA	NA	NA	NA	NA	NA
T1D	rs28366200	6	32589182	A	G	-0.889323	0.138505	1.35e-10	NA	NA	NA	NA	NA	NA	NA	NA	NA	NA
T1D	rs28371173	6	32644280	A	T	-1.03524	0.029699	1e-200	NA	NA	NA	NA	NA	NA	NA	NA	NA	NA
T1D	rs36194033	6	32522182	T	G	0.847953	0.092341	4.2e-20	NA	NA	NA	NA	NA	NA	NA	NA	NA	NA
T1D	rs17214134	6	33003905	A	G	-0.704663	0.092624	2.79e-14	NA	NA	NA	NA	NA	NA	NA	NA	NA	NA
T1D	rs72687965	1	113530530	C	G	0.375731	0.03537	2.33e-26	NA	NA	NA	NA	NA	NA	NA	NA	NA	NA
T1D	rs376558492	11	2269965	C	T	-0.255531	0.046764	4.65e-08	NA	NA	NA	NA	NA	NA	NA	NA	NA	NA
T1D	rs185774696	6	32650413	T	C	0.9484	0.053894	2.57e-69	NA	NA	NA	NA	NA	NA	NA	NA	NA	NA
T1D	rs185916624	6	32505906	A	G	0.310109	0.054126	1.01e-08	NA	NA	NA	NA	NA	NA	NA	NA	NA	NA
T1D	rs113185994	6	31394862	A	G	-0.611471	0.107946	1.47e-08	NA	NA	NA	NA	NA	NA	NA	NA	NA	NA
T1D	rs543783795	6	32518499	T	C	1.13101	0.079113	2.31e-46	NA	NA	NA	NA	NA	NA	NA	NA	NA	NA
T1D	rs543993279	6	32521798	G	C	0.427336	0.06701	1.8e-10	NA	NA	NA	NA	NA	NA	NA	NA	NA	NA
T1D	rs116752065	6	32514787	G	A	0.686843	0.081165	2.62e-17	NA	NA	NA	NA	NA	NA	NA	NA	NA	NA
T1D	rs547731442	6	32520299	A	G	0.539691	0.079879	1.42e-11	NA	NA	NA	NA	NA	NA	NA	NA	NA	NA
T1D	rs181241380	6	32520783	T	A	0.845349	0.050313	2.37e-63	NA	NA	NA	NA	NA	NA	NA	NA	NA	NA
T1D	rs182239097	6	32008451	T	C	0.45109	0.056886	2.2e-15	NA	NA	NA	NA	NA	NA	NA	NA	NA	NA
T1D	rs114085331	6	32511653	A	C	-0.45212	0.063011	7.22e-13	NA	NA	NA	NA	NA	NA	NA	NA	NA	NA
T1D	rs182547608	6	32446230	G	T	-1.88749	0.162106	2.47e-31	NA	NA	NA	NA	NA	NA	NA	NA	NA	NA
T1D	rs182559256	6	32505996	T	C	1.25009	0.108344	8.47e-31	NA	NA	NA	NA	NA	NA	NA	NA	NA	NA
T1D	rs184201485	6	32488660	T	C	1.7974	0.163593	4.41e-28	NA	NA	NA	NA	NA	NA	NA	NA	NA	NA
T1D	rs536602508	6	32528826	C	T	0.606932	0.058285	2.16e-25	NA	NA	NA	NA	NA	NA	NA	NA	NA	NA
T1D	rs558538827	6	32572701	C	T	0.561416	0.077114	3.33e-13	NA	NA	NA	NA	NA	NA	NA	NA	NA	NA
T1D	rs186324811	6	32491333	T	C	2.92955	0.340883	8.4e-18	NA	NA	NA	NA	NA	NA	NA	NA	NA	NA
T1D	rs9260340	6	29949481	T	C	-0.190162	0.029554	1.24e-10	NA	NA	NA	NA	NA	NA	NA	NA	NA	NA
T1D	rs114693948	6	32518096	T	G	0.56287	0.060233	9.2e-21	NA	NA	NA	NA	NA	NA	NA	NA	NA	NA
T1D	rs147168394	6	32466356	A	G	-1.12746	0.088245	2.22e-37	NA	NA	NA	NA	NA	NA	NA	NA	NA	NA
T1D	rs4236045	6	27718527	T	C	0.311515	0.049334	2.71e-10	NA	NA	NA	NA	NA	NA	NA	NA	NA	NA
T1D	rs189940530	6	32522863	A	T	1.08957	0.086868	4.35e-36	NA	NA	NA	NA	NA	NA	NA	NA	NA	NA
T1D	rs9266161	6	31356717	G	A	-0.484365	0.059965	6.61e-16	NA	NA	NA	NA	NA	NA	NA	NA	NA	NA
T1D	rs575287232	6	32576963	G	A	1.18411	0.076257	2.25e-54	NA	NA	NA	NA	NA	NA	NA	NA	NA	NA
T1D	rs115984130	6	32491578	G	C	0.639681	0.056346	7.19e-30	NA	NA	NA	NA	NA	NA	NA	NA	NA	NA
T1D	rs531678040	6	32167431	G	T	0.623955	0.111679	2.31e-08	NA	NA	NA	NA	NA	NA	NA	NA	NA	NA
T1D	rs534331448	6	32651312	C	T	0.49318	0.048184	1.38e-24	NA	NA	NA	NA	NA	NA	NA	NA	NA	NA
T1D	rs557987688	6	32556482	G	A	0.789196	0.069238	4.26e-30	NA	NA	NA	NA	NA	NA	NA	NA	NA	NA
T1D	rs59473977	6	32490204	T	C	0.555508	0.092777	2.13e-09	NA	NA	NA	NA	NA	NA	NA	NA	NA	NA
T1D	rs538569671	6	32518533	T	A	-0.333138	0.058545	1.27e-08	NA	NA	NA	NA	NA	NA	NA	NA	NA	NA
T1D	rs73396594	6	28108093	T	C	-0.557626	0.084033	3.23e-11	NA	NA	NA	NA	NA	NA	NA	NA	NA	NA
T1D	rs2254847	6	30966071	T	A	0.267473	0.031838	4.43e-17	NA	NA	NA	NA	NA	NA	NA	NA	NA	NA
T1D	rs41548618	6	32521968	G	C	0.50502	0.067254	5.95e-14	NA	NA	NA	NA	NA	NA	NA	NA	NA	NA
T1D	rs9273651	6	32661422	C	T	0.536795	0.067713	2.24e-15	NA	NA	NA	NA	NA	NA	NA	NA	NA	NA
T1D	rs544068844	6	32518766	T	G	0.890289	0.109304	3.79e-16	NA	NA	NA	NA	NA	NA	NA	NA	NA	NA
T1D	rs557315642	6	32555595	G	A	1.02052	0.103439	5.85e-23	NA	NA	NA	NA	NA	NA	NA	NA	NA	NA
T1D	rs554382157	6	32511114	A	C	1.24581	0.142429	2.19e-18	NA	NA	NA	NA	NA	NA	NA	NA	NA	NA
T1D	rs11753996	6	28611812	C	G	-0.247796	0.044491	2.55e-08	NA	NA	NA	NA	NA	NA	NA	NA	NA	NA
T1D	rs555991553	6	33313942	C	A	0.982264	0.118783	1.35e-16	NA	NA	NA	NA	NA	NA	NA	NA	NA	NA
T1D	rs558695715	6	32519099	T	C	-0.603092	0.101458	2.78e-09	NA	NA	NA	NA	NA	NA	NA	NA	NA	NA
T1D	rs9688547	6	30240568	G	A	-0.400206	0.066857	2.15e-09	NA	NA	NA	NA	NA	NA	NA	NA	NA	NA
T1D	rs142274031	6	32455270	T	C	-1.51994	0.118213	7.79e-38	NA	NA	NA	NA	NA	NA	NA	NA	NA	NA
T1D	rs41284712	6	32583512	T	G	0.571703	0.091699	4.53e-10	NA	NA	NA	NA	NA	NA	NA	NA	NA	NA
T1D	rs28397274	6	31196986	G	A	0.216322	0.017232	3.81e-36	NA	NA	NA	NA	NA	NA	NA	NA	NA	NA
T1D	rs76312591	6	32520886	C	T	-0.575858	0.103125	2.35e-08	NA	NA	NA	NA	NA	NA	NA	NA	NA	NA
T1D	rs577767363	6	32528858	A	G	0.372227	0.052469	1.3e-12	NA	NA	NA	NA	NA	NA	NA	NA	NA	NA
T1D	rs139101653	6	31306397	T	C	-0.680494	0.061774	3.2e-28	NA	NA	NA	NA	NA	NA	NA	NA	NA	NA
T1D	rs76308833	6	32492416	A	G	0.92378	0.088634	1.96e-25	NA	NA	NA	NA	NA	NA	NA	NA	NA	NA
T1D	rs577957196	6	32709810	C	T	1.28982	0.171564	5.56e-14	NA	NA	NA	NA	NA	NA	NA	NA	NA	NA
T1D	rs9368779	6	33848675	G	A	-0.115601	0.014995	1.26e-14	NA	NA	NA	NA	NA	NA	NA	NA	NA	NA
T1D	rs553276313	6	32648735	A	C	0.881024	0.049895	8.9e-70	NA	NA	NA	NA	NA	NA	NA	NA	NA	NA
T1D	rs140601964	11	2197809	A	G	-0.750014	0.102536	2.58e-13	NA	NA	NA	NA	NA	NA	NA	NA	NA	NA
T1D	rs141268310	6	33101809	T	C	0.425499	0.053473	1.76e-15	NA	NA	NA	NA	NA	NA	NA	NA	NA	NA
T1D	rs555911977	6	32567677	T	C	0.661177	0.054732	1.34e-33	NA	NA	NA	NA	NA	NA	NA	NA	NA	NA
T1D	rs182333719	6	32487232	C	T	2.05308	0.308242	2.73e-11	NA	NA	NA	NA	NA	NA	NA	NA	NA	NA
T1D	rs577372805	6	32573088	C	A	0.465758	0.077171	1.59e-09	NA	NA	NA	NA	NA	NA	NA	NA	NA	NA
T1D	rs145153097	6	32527181	T	C	1.65461	0.265684	4.73e-10	NA	NA	NA	NA	NA	NA	NA	NA	NA	NA
T1D	rs189165836	6	32522574	T	G	2.51029	0.316406	2.13e-15	NA	NA	NA	NA	NA	NA	NA	NA	NA	NA

## Sheet: Table S9
Table S9. SNPs used to construct polygenic risk score (PRS) of systemic lupus erythematosus (SLE)
Disease	SNP	chr	pos	Both sex				Female
				alt	ref	beta	pval	alt	ref	beta	se	pval
SLE	rs6679677	1	114303808	A	C	0.336472	4.54552e-13	A	C	0.000107241	0.000227828	0.637847
SLE	rs4661543	1	15229101	T	G	-0.274437	9.39891e-11	G	T	0.000178518	0.000208287	0.391403
SLE	rs6671847	1	161478810	A	G	0.198851	6.64016e-12	A	G	0.000334166	0.000138811	0.0160698
SLE	rs10912578	1	173251856	A	G	0.24686	1.64776e-15	G	A	6.92944e-05	0.00014871	0.641238
SLE	rs4916215	1	173314540	C	T	-0.223144	5.06636e-11	T	C	0.000326495	0.000155652	0.0359423
SLE	rs80087370	1	183224185	T	A	0.631272	1.47784e-10	T	A	0.000415601	0.000533384	0.435876
SLE	rs946173	1	183260659	G	A	0.270027	2.69112e-11	G	A	9.49814e-05	0.000210661	0.652081
SLE	rs78517564	1	183442324	C	A	-0.328504	1.89849e-10	C	A	-0.000212773	0.000209257	0.309251
SLE	rs17849501	1	183542323	T	C	0.81093	1.8137e-59	T	C	0.00092006	0.000310258	0.00302263
SLE	rs7097397	10	50025396	A	G	-0.18633	8.60398e-11	A	G	-7.43508e-05	0.000143204	0.603627
SLE	rs7899626	10	63825561	T	C	0.182322	4.18576e-08	T	C	0.000281636	0.00015243	0.0646565
SLE	rs353608	11	35101738	A	G	-0.18633	2.93228e-11	G	A	-0.00010965	0.00013838	0.428135
SLE	rs58688157	11	625085	G	A	-0.223144	2.96791e-11	G	A	-0.000609212	0.000154186	7.77996e-05
SLE	rs6421973	11	663174	C	T	0.173953	8.12028e-09	C	T	0.000299142	0.00013874	0.0310742
SLE	rs597808	12	111973358	G	A	-0.162519	3.50683e-08	G	A	-0.000242561	0.000138224	0.0792885
SLE	rs73050535	12	5012503	T	C	-0.71335	9.10536e-09	T	C	0.000398702	0.000451322	0.377016
SLE	rs1143679	16	31276811	A	G	0.582216	5.02694e-48	A	G	0.000528748	0.000232158	0.0227553
SLE	rs12598380	16	31282098	T	C	-0.235722	1.56454e-14	T	C	-0.000143917	0.000143324	0.315315
SLE	rs62051483	16	31327376	G	A	0.270027	4.00256e-15	A	G	0.000357864	0.000256479	0.162929
SLE	rs13332649	16	85966683	G	A	-0.314711	5.42755e-17	G	A	-0.000274577	0.000164852	0.0957946
SLE	rs11117433	16	86019516	C	G	-0.235722	2.21556e-08	C	G	-0.00016156	0.000167499	0.334776
SLE	rs143123127	17	38007190	A	G	0.470004	2.23174e-08	A	G	-5.84036e-05	0.000378785	0.877463
SLE	rs35251378	19	10459969	A	G	-0.235722	3.6103e-13	A	G	-0.000223859	0.000151834	0.140386
SLE	rs34536443	19	10463118	C	G	-0.673345	2.02551e-11	C	G	-0.000745454	0.000336941	0.0269389
SLE	rs73068668	19	55763262	A	G	-0.314711	4.39618e-08	A	G	-4.19568e-05	0.000263304	0.873395
SLE	rs13019891	2	113829869	T	G	-0.562119	1.64719e-83	T	G	4.1283e-05	0.000139363	0.767058
SLE	rs512681	2	119450163	A	C	-0.301105	8.74879e-13	A	C	0.000288751	0.000195884	0.140458
SLE	rs2293765	2	191520845	C	A	0.262364	3.60855e-19	A	C	-0.000277674	0.00013866	0.0452273
SLE	rs7601754	2	191940451	G	A	-0.385662	9.31063e-25	A	G	0.000280129	0.000184182	0.128278
SLE	rs4274624	2	191958656	C	T	0.559616	9.73273e-66	T	C	-0.000514273	0.000165116	0.00184218
SLE	rs149218447	2	191963305	A	G	0.559616	1.93927e-14	A	G	0.00012758	0.000382751	0.738891
SLE	rs10048743	2	213890232	G	T	0.231112	2.03803e-08	T	G	-8.65944e-05	0.000200107	0.665204
SLE	rs10200680	2	223961877	T	C	-0.248461	4.96262e-09	T	C	6.03825e-05	0.000195961	0.75798
SLE	rs2573219	2	233288667	C	A	0.587787	1.13327e-42	C	A	0.000193049	0.000240671	0.422479
SLE	rs34703115	2	40282854	C	T	-0.616186	4.08053e-09	C	T	-0.000206506	0.000439851	0.63872
SLE	rs268124	2	65654364	C	T	-0.18633	8.60306e-09	T	C	3.59252e-05	0.000156198	0.818094
SLE	rs3747093	22	21984379	A	G	0.262364	2.88112e-14	A	G	0.000317255	0.000176163	0.0717171
SLE	rs9852014	3	129084581	G	A	0.620576	2.25712e-36	G	A	-2.3484e-05	0.00027215	0.931236
SLE	rs1464446	3	146601295	T	G	-0.328504	2.79229e-16	T	G	-0.000197211	0.000175278	0.260535
SLE	rs13136219	4	102743687	T	C	-0.174353	3.50427e-10	T	C	-0.00018979	0.000143001	0.184446
SLE	rs4388254	5	133428601	T	C	0.378436	3.71046e-10	T	C	0.000677888	0.000369493	0.0665601
SLE	rs1078324	5	149202268	A	C	-0.71335	7.10544e-20	A	C	8.47278e-05	0.000299685	0.77739
SLE	rs6889239	5	150457771	C	T	0.277632	2.1896e-18	C	T	0.000309676	0.000162755	0.0570784
SLE	rs2431697	5	159879978	C	T	-0.223144	2.60144e-14	C	T	-0.000155838	0.000139407	0.263624
SLE	rs7768653	6	106574794	C	T	0.207014	3.10827e-12	T	C	-5.67928e-05	0.000140839	0.686767
SLE	rs670369	6	138147048	C	T	0.223144	6.83067e-09	T	C	-0.000219516	0.000190863	0.250094
SLE	rs58721818	6	138243739	T	C	0.65752	3.37674e-18	T	C	0.000882057	0.000391555	0.0242791
SLE	rs721803	6	25603622	G	A	0.198851	1.81024e-09	A	G	-0.000351383	0.000159331	0.0274296
SLE	rs9467711	6	26332605	C	A	0.392042	3.14562e-18	C	A	0.000960509	0.000209907	4.74513e-06
SLE	rs9348711	6	26360597	G	A	0.231112	8.61463e-12	G	A	0.000471711	0.00015755	0.00275351
SLE	rs6904024	6	26746421	A	G	0.392042	3.97192e-20	A	G	0.000745976	0.000192754	0.000108832
SLE	rs6923811	6	27289776	C	T	0.173953	2.83338e-08	C	T	0.00024634	0.000148007	0.0960375
SLE	rs200986	6	27824766	C	G	0.431782	7.54287e-25	C	G	0.000539359	0.000154622	0.000486335
SLE	rs13215804	6	28415572	G	A	0.182322	2.13472e-09	G	A	0.000321991	0.000143278	0.0246212
SLE	rs114115115	6	30989692	G	T	-0.356675	2.37462e-10	G	T	-0.000405138	0.000288951	0.160886
SLE	rs150180633	6	31010047	T	C	0.928219	2.66099e-41	T	C	6.63768e-05	0.000609624	0.913297
SLE	rs1265061	6	31078257	A	C	0.371564	1.77814e-35	A	C	0.000775703	0.000146367	1.16105e-07
SLE	rs2233959	6	31081065	C	T	0.277632	2.83906e-22	C	T	0.000612734	0.00014143	1.47564e-05
SLE	rs1265047	6	31081464	G	A	0.239017	8.69424e-17	G	A	0.000416128	0.000139567	0.00286807
SLE	rs3130568	6	31102884	C	T	0.235704	1.45481e-16	C	T	0.00048875	0.000138115	0.00040219
SLE	rs12721829	6	31324208	T	G	-0.328504	3.37989e-17	A	G	-0.000217641	0.000227675	0.33911
SLE	rs1131159	6	31324892	G	C	0.350657	2.05e-31	C	G	-0.000573575	0.000139667	4.01448e-05
SLE	rs2428493	6	31329135	A	C	-0.18633	8.97641e-11	A	C	-0.000619745	0.000140427	1.0186e-05
SLE	rs9266303	6	31329609	T	G	-0.235722	1.3169e-08	T	G	-0.000609102	0.000186979	0.00112378
SLE	rs116704939	6	31363584	C	T	-0.248461	1.34447e-11	C	T	3.63086e-05	0.000167877	0.828769
SLE	rs2904597	6	31461132	G	C	-0.248461	1.38591e-12	G	C	-0.00054626	0.000161535	0.000720591
SLE	rs2507967	6	31472956	C	G	-0.356675	3.12684e-24	C	G	-0.000583426	0.000158907	0.000241198
SLE	rs2515919	6	31564167	G	A	-0.223144	1.14312e-13	G	A	-0.000359496	0.00014271	0.0117675
SLE	rs2293861	6	31711124	T	C	-0.385662	9.84274e-21	T	C	-0.000562242	0.000202504	0.00549606
SLE	rs146903072	6	31847180	A	G	-0.916291	4.53363e-14	A	G	-0.000444011	0.000532762	0.404613
SLE	rs7746553	6	31895973	G	C	-0.274437	1.15647e-11	G	C	-0.000611181	0.000192139	0.00146829
SLE	rs2293751	6	31907837	G	A	0.314738	7.86347e-26	A	G	-0.000550123	0.000139138	7.6947e-05
SLE	rs1270942	6	31918860	G	A	0.928219	1.4455e-101	G	A	0.00164299	0.000202865	5.57602e-16
SLE	rs389512	6	31947594	C	G	-0.274437	2.46729e-10	C	G	-0.000350939	0.000203419	0.0844929
SLE	rs143810596	6	32390436	G	T	-0.616186	4.40935e-08	G	T	-0.000569358	0.000463874	0.219674
SLE	rs143553568	6	32531583	T	C	-0.314711	1.65557e-12	T	C	8.35499e-05	0.000195703	0.669437
SLE	rs36229731	6	32593547	C	A	-0.314711	1.2757e-09	T	A	-0.0015793	0.000751018	0.0354774
SLE	rs116334170	6	32598500	A	G	0.322083	2.92616e-23	A	G	0.000684244	0.000469765	0.145238
SLE	rs28383364	6	32606912	G	A	-0.356675	6.44266e-20	G	A	-0.000547027	0.000173963	0.00166392
SLE	rs145607970	6	32624017	A	C	0.500775	3.54288e-14	A	C	-0.00054198	0.000437885	0.21582
SLE	rs12055445	6	32626739	A	G	0.494269	3.91287e-62	G	A	-0.000617163	0.000138621	8.50614e-06
SLE	rs9274408	6	32632850	A	G	0.512824	1.0435e-48	A	G	0.000701634	0.000157233	8.11016e-06
SLE	rs9276807	6	32780156	A	G	0.239017	5.21119e-16	A	G	0.000388755	0.000149061	0.00910727
SLE	rs2856997	6	32781776	A	C	-0.235722	4.42618e-16	A	C	-0.000304277	0.00014141	0.0314193
SLE	rs3819720	6	32804570	A	G	0.239017	2.10226e-15	A	G	0.000232174	0.000143846	0.106519
SLE	rs2071466	6	32805307	T	C	0.19062	1.32877e-09	T	C	0.000540048	0.000151716	0.000371525
SLE	rs116540075	6	33470659	T	C	0.530628	8.22043e-14	T	C	0.00110649	0.000356821	0.00192912
SLE	rs501480	6	33563946	C	T	0.198851	2.07494e-11	C	T	0.000276526	0.000138643	0.0460972
SLE	rs7752538	6	34674502	A	G	0.336472	1.2249e-08	A	G	-5.81071e-05	0.000309616	0.851132
SLE	rs2004640	7	128578301	G	T	-0.34249	2.89921e-31	T	G	0.000425014	0.000137886	0.00205399
SLE	rs35000415	7	128585616	T	C	0.587787	1.8609e-45	T	C	0.000865172	0.000219998	8.40481e-05
SLE	rs12155244	7	128710988	T	C	-0.248461	1.36843e-10	C	T	0.000382248	0.000175963	0.0298331
SLE	rs7799991	7	128738941	T	A	0.19062	5.76968e-11	T	A	0.000168032	0.000139392	0.228027
SLE	rs117020262	7	128771234	A	G	0.609766	2.51965e-08	A	G	0.000460003	0.000502378	0.359851
SLE	rs2736332	8	11339965	C	G	0.277632	4.83401e-18	C	G	0.000302575	0.000155488	0.0516598
SLE	rs7386188	8	50609940	T	G	-0.494296	1.10468e-08	G	T	-0.00107873	0.000391892	0.00591261
SLE	rs7823055	8	55511676	G	T	0.350657	1.64303e-34	T	G	-8.31785e-05	0.000140462	0.553732
SLE	rs9266527	6	31341672	G	A	0.239017	3.00063e-14	NA	NA	NA	NA	NA
SLE	rs146526194	6	29748646	C	A	0.207014	2.90942e-12	NA	NA	NA	NA	NA
SLE	rs9273058	6	32612110	T	C	0.512824	1.61139e-63	NA	NA	NA	NA	NA
SLE	rs9273217	6	32613747	G	T	0.29267	6.88091e-19	NA	NA	NA	NA	NA
SLE	rs116572578	6	32491368	C	T	-0.385662	1.35962e-15	NA	NA	NA	NA	NA
SLE	rs111637026	6	32471012	A	G	-0.356675	1.77271e-26	NA	NA	NA	NA	NA
SLE	rs111984068	6	32455311	T	C	0.300105	1.8447e-18	NA	NA	NA	NA	NA
SLE	rs113008589	6	32479244	T	A	-0.248461	1.3467e-09	NA	NA	NA	NA	NA
SLE	rs184135501	6	32540441	G	A	-0.314711	5.11342e-11	NA	NA	NA	NA	NA
SLE	rs113154956	6	32537479	C	T	-0.328504	3.12094e-14	NA	NA	NA	NA	NA
SLE	rs114012503	6	32537489	G	A	0.41211	1.08563e-26	NA	NA	NA	NA	NA
SLE	rs189472473	6	32454753	T	A	-0.287682	2.71332e-16	NA	NA	NA	NA	NA
SLE	rs190437864	6	32459111	G	A	-0.287682	7.66549e-12	NA	NA	NA	NA	NA
SLE	rs116191291	6	32469662	T	C	-0.400478	5.68166e-34	NA	NA	NA	NA	NA
SLE	rs116292975	6	32523411	G	A	-0.261365	1.83935e-11	NA	NA	NA	NA	NA
SLE	rs9272543	6	32606865	C	G	0.438255	2.59581e-34	NA	NA	NA	NA	NA
SLE	rs2097294	6	32779583	T	C	0.698135	1.20508e-23	NA	NA	NA	NA	NA
SLE	rs142912783	6	32482518	G	A	-0.314711	5.97739e-17	NA	NA	NA	NA	NA
SLE	rs78325334	6	32460867	C	T	-0.356675	4.01704e-26	NA	NA	NA	NA	NA
SLE	rs140538649	6	32507946	T	C	0.371564	3.14315e-22	NA	NA	NA	NA	NA
SLE	rs117802264	6	32486145	T	C	-0.287682	2.85502e-09	NA	NA	NA	NA	NA
SLE	rs28465657	6	32619972	T	A	-0.446287	2.35355e-33	NA	NA	NA	NA	NA
SLE	rs74778143	6	32472536	C	T	-0.314711	5.99117e-13	NA	NA	NA	NA	NA
SLE	rs78897911	6	32455586	G	A	0.431782	5.03875e-39	NA	NA	NA	NA	NA
SLE	rs187582489	6	32539553	T	C	0.462034	1.4368e-43	NA	NA	NA	NA	NA
SLE	rs142174523	6	31294290	A	G	0.357674	1.54172e-22	NA	NA	NA	NA	NA
SLE	rs182793436	6	32547530	T	G	0.470004	6.77671e-34	NA	NA	NA	NA	NA
SLE	rs75560072	6	32472107	C	G	0.398776	8.66839e-34	NA	NA	NA	NA	NA
SLE	rs17843693	6	32622122	A	G	0.431782	7.62595e-42	NA	NA	NA	NA	NA
SLE	rs57760582	6	32479550	T	C	0.207014	7.66706e-10	NA	NA	NA	NA	NA
SLE	rs146222234	6	32485916	G	A	0.24686	3.07006e-12	NA	NA	NA	NA	NA
SLE	rs184348324	6	29863525	A	G	-0.18633	1.09787e-08	NA	NA	NA	NA	NA
SLE	rs34462676	6	32628922	C	G	-0.415515	1.4632e-23	NA	NA	NA	NA	NA

[truncated: 23 more sheets: Table S10, Table S11, Table S12, Table S13, Table S14, Table S15, Table S16, Table S17, Table S18, Table S19, Table S20, Table S21, Table S22, Table S23, Table S24, Table S25, Table S26, Table S27, Table S28, Table S29 …]
