# Supplementary material for: Disentangling the Complex Relationships Between Autoimmune Diseases and Cancer Through Polygenic Risk Scores: Evidence from a Large Prospective Study
Source: Research Square preprint supplement (doi:10.21203/rs.3.rs-6491161/v1), 2025-05-07
Supplement: Supplementary file 2 [file d558559cee4f94b1c2552140.docx]

**Supplementary Methods and Figure for**

**Large-scale population-based study highlights increased cancer risk among individuals with elevated genetic predisposition to autoimmune diseases**

**Supplementary Methods**

**Identification of related individuals**

The identification of related individuals (with relative 3rd degree or closer) was performed using the R package “igraph” 1,2. We first pruned the full pairwise kinship table, which only included White British participants, and then identified and chose the largest subset of individuals without relatedness by the algorithm implemented in the “largest_ivs” function.

**Construction of autoimmune disease polygenic risk scores**

For each autoimmune disease (AID), risk-associated variants with genome-wide significance (*P*<5×10-8) and corresponding effect sizes (beta) were obtained from published GWASs with the largest sample size (**Table S2**) by systematically searching the AID GWAS of European ancestry in PubMed and GWAS Catalog (https://www.ebi.ac.uk/gwas/). The LD clumping (r2<0.1 in ± 500 kb window) was performed to obtain independent susceptibility variants. We then constructed the PRS using independent variants for each AID following an additive model as described elsewhere 3. The dosage of each risk allele of variant for each participant was summed after multiplying its corresponding effect size of individual AID in the GWAS of both sexes. Given the different spectrum of AID incidence between males and females, we also constructed sex-specific AID-PRS, and the same SNP list and method were used, whereas the effect size for each SNP was extracted from sex-specific GWAS summary statistics. For SLE, GWAS summary statistics for males were not available; therefore, the male SLE-PRS was constructed based on the effect sizes from GWAS summary statistics of both sexes.

To establish an indicator of genetic predisposition for overall autoimmune disease, we further combined individual AID PRS into a composite PRS (CAID-PRS), weighted by incidence 3, as follows:

, where hn is the age-standardized incidence of individual AIDn among the UK population 4-6 (**Table S3**) and PRSi,n is the corresponding PRS of individual AIDn for the ith participant in the UKBB. For sex-specific CAID-PRS, we used the sex-specific individual AID-PRS and corresponding sex-specific disease incidence in UK accordingly. Details on SNPs used to construct AID-PRSs (both sexes and sex-specific) are shown in **Tables S4-S9**.

**Assessment of genetic correlation between AIDs and cancers**

For significant AID-cancer pairs in the PRS analysis, we further estimate overall genetic correlations between AIDs and cancers by employing LD score regression (LDSC) 7 based on genome-wide summary statistics. The information on GWAS summary statistics for autoimmune diseases and cancers is presented in **Tables S2 and S10**. GWAS summary statistics were converted to ldsc format for analysis by following the munge_sumstats.py function of LDSC. The LD score panel of 1000 Genomes Project Phase 3 EUR was used as the reference panel.

**Sensitivity analysis**

To assess the robustness of the findings, we further performed several sensitivity analyses. First, given that the large-scale population-based cohort contains an unbalanced number of cases and controls, we fitted Firth's bias-reduced logistic regression model by employing R package ‘logistf’ 8 to reevaluate the association between AID at baseline (yes or no) or genetic predisposition to AID and cancer risk. Second, for significant AID-PRS-cancer pairs, we added immunosuppressant use at baseline as a covariate (model 2) based on the initial multivariable-adjusted CPH model, considering the immunoregulation effect of immunosuppressive drugs. We additionally adjusted for the corresponding cancer PRS (model 3) to estimate the association of AID-PRS with cancer independent of inherited genetic liability of cancer. Third, for significant AID-PRS-cancer pairs, we also further evaluated the relationship between the corresponding AID at baseline and cancer using initial multivariable-adjusted CPH regression in the observational association analysis stage (model i). Additionally adjusted for the corresponding AID-PRS in model ii, the corresponding cancer PRS in model iii, and immunosuppressant use in model iv. For correction of multiple testing, the statistical significance was considered as false discovery rate (FDR) by Benjamini-Hochberg (BH) adjusted two-sided P-values <0.05. All data cleaning and statistical analyses were conducted in R version 4.2.2, unless otherwise specified.

**References**

1. Csardi G, Nepusz T. The Igraph Software Package for Complex Network Research. *InterJournal.* 2005;Complex Systems:1695.

2. Bycroft C, Freeman C, Petkova D, et al. The UK Biobank resource with deep phenotyping and genomic data. (1476-4687 (Electronic)).

3. Zhu M, Wang T, Huang Y, et al. Genetic Risk for Overall Cancer and the Benefit of Adherence to a Healthy Lifestyle. *Cancer research.* 2021;81(17):4618-4627.

4. Global burden of 369 diseases and injuries in 204 countries and territories, 1990-2019: a systematic analysis for the Global Burden of Disease Study 2019. *Lancet (London, England).* 2020;396(10258):1204-1222.

5. Pasvol TJ, Horsfall L, Bloom S, et al. Incidence and prevalence of inflammatory bowel disease in UK primary care: a population-based cohort study. *BMJ open.* 2020;10(7):e036584.

6. Tian J, Zhang D, Yao X, Huang Y, Lu Q. Global epidemiology of systemic lupus erythematosus: a comprehensive systematic analysis and modelling study. *Annals of the rheumatic diseases.* 2023;82(3):351-356.

7. Bulik-Sullivan B, Finucane HK, Anttila V, et al. An atlas of genetic correlations across human diseases and traits. *Nature genetics.* 2015;47(11):1236-1241.

8. Heinze G, Ploner M, Jiricka L, Steiner G. logistf: Firth's Bias-Reduced Logistic Regression. R package version 1.26.0. <https://CRAN.R-project.org/package=logistf>. 2023.

**Supplementary Figure**


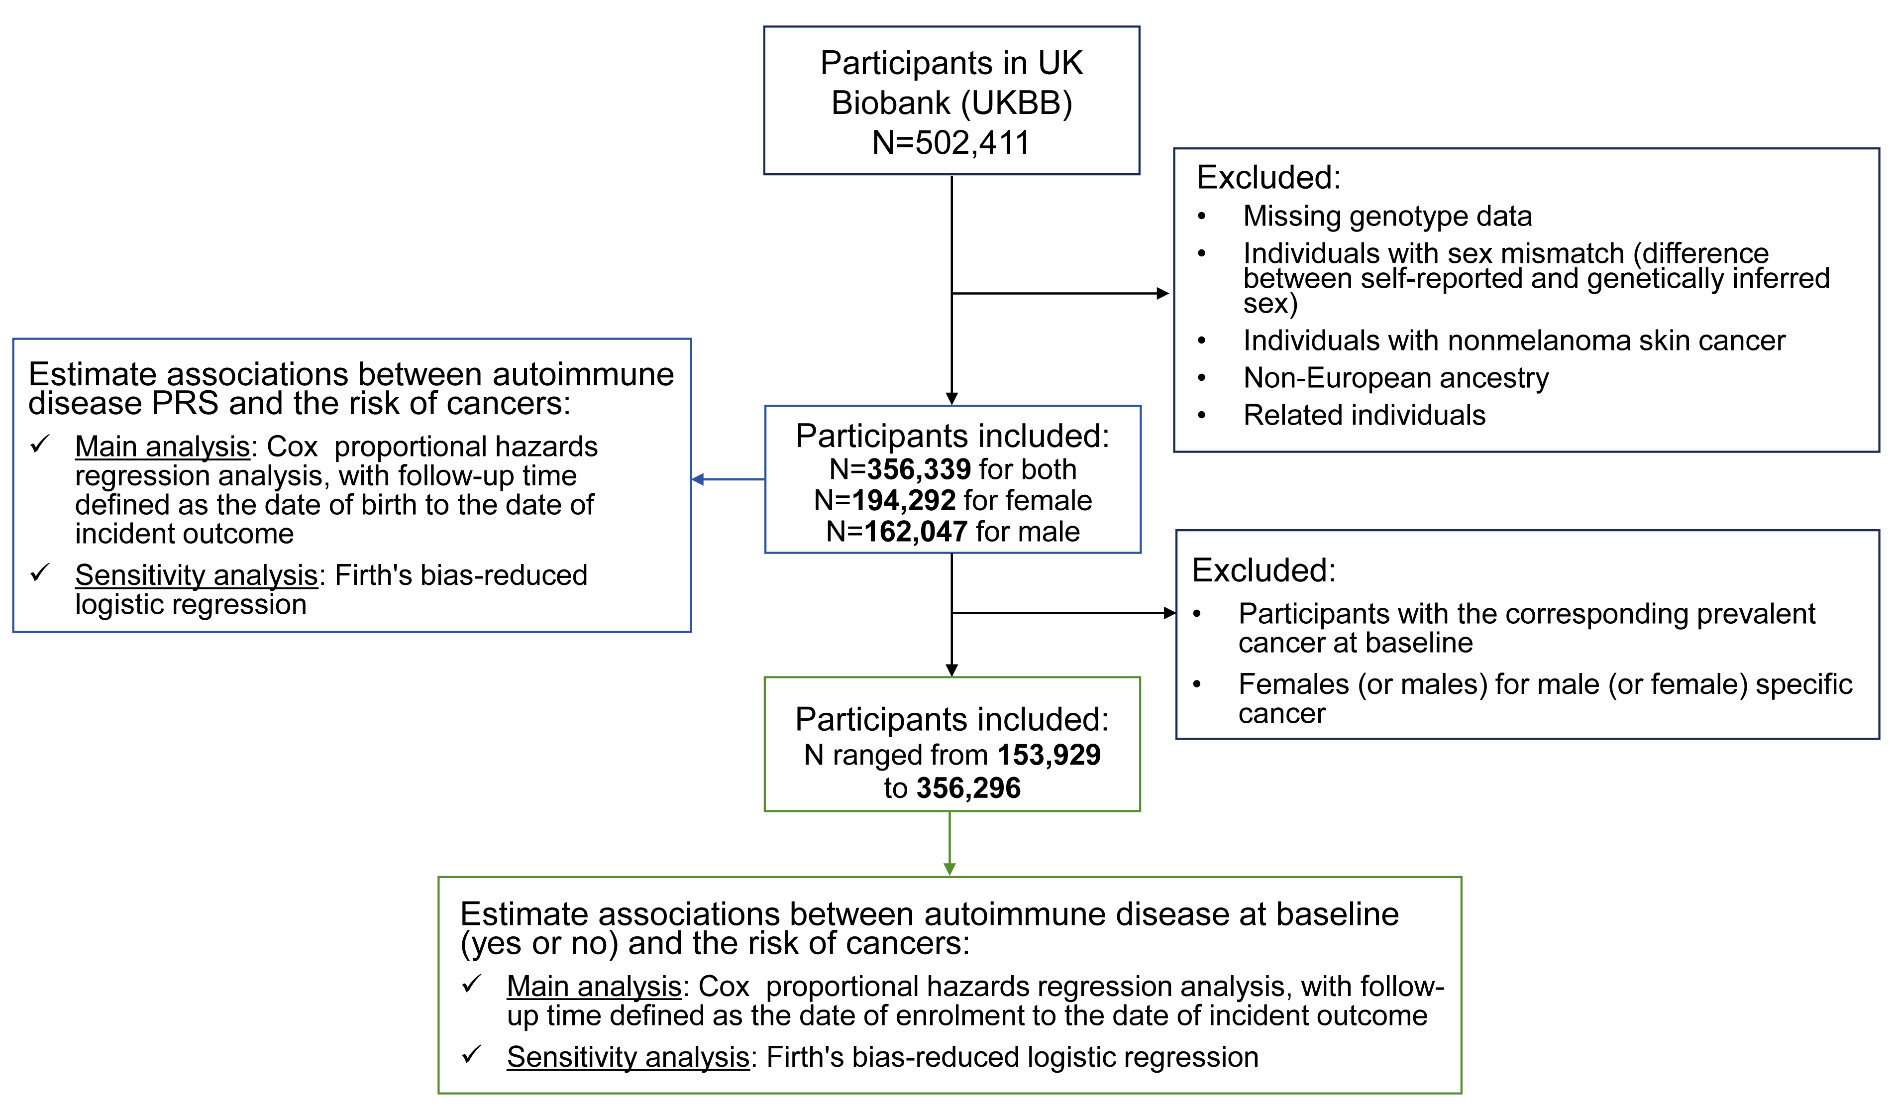


**Figure S1** Flowchart showing the selection of participants. PRS, polygenic risk score.
